# Supplementary material for: The Transcription and Translation Landscapes during Human Cytomegalovirus Infection Reveal Novel Host-Pathogen Interactions
Source: PLoS Pathog. 2015 Nov 24;11(11):e1005288. doi: 10.1371/journal.ppat.1005288 (PMC4658056; doi:10.1371/journal.ppat.1005288)
Supplement: S3 Table — Each sheet presents the analysis of the indicated cluster. (XLSX) [file ppat.1005288.s021.xlsx]

## Sheet: cluster_1
Ingenuity Canonical Pathways	-log(p-value)	Ratio	Molecules
Role of BRCA1 in DNA Damage Response	15.9	0.35	FANCM,FANCG,BARD1,ATRIP,MRE11A,FANCC,RBL1,RFC5,MLH1,RAD51,MSH2,RFC4,FANCD2,E2F1,MSH6,RFC2,BLM,BRCA1,FANCA,E2F2,RFC3
Mismatch Repair in Eukaryotes	12.8	0.688	PCNA,MSH2,RFC4,MSH6,RFC2,FEN1,RFC5,POLD1,MLH1,EXO1,RFC3
Cell Cycle Control of Chromosomal Replication	12.5	0.5	MCM5,MCM6,CDC45,CDT1,CDC6,CDC7,MCM4,RPA2,MCM3,RPA3,MCM2,ORC1,MCM7
Hereditary Breast Cancer Signaling	11.2	0.202	FANCM,CDC25C,FANCG,BARD1,MRE11A,FANCC,RFC5,CDK1,MLH1,RAD51,FANCD2,RFC4,MSH2,H2AFX,E2F1,MSH6,RFC2,PIK3CB,BLM,BRCA1,FANCA,RFC3
Role of CHK Proteins in Cell Cycle Checkpoint Control	7.71	0.236	PCNA,CDC25C,RFC4,E2F1,RFC2,CLSPN,MRE11A,BRCA1,RFC5,PPP2R1B,E2F2,CDK1,RFC3
Superpathway of Cholesterol Biosynthesis	7.09	0.346	FDFT1,EBP,NSDHL,ACAT2,MSMO1,HMGCR,TM7SF2,HMGCS1,SC5D
Cholesterol Biosynthesis I	5.75	0.462	FDFT1,EBP,NSDHL,MSMO1,TM7SF2,SC5D
Cholesterol Biosynthesis II (via 24,25-dihydrolanosterol)	5.75	0.462	FDFT1,EBP,NSDHL,MSMO1,TM7SF2,SC5D
Cholesterol Biosynthesis III (via Desmosterol)	5.75	0.462	FDFT1,EBP,NSDHL,MSMO1,TM7SF2,SC5D
ATM Signaling	4.69	0.169	RAD51,CDC25C,SMC2,FANCD2,H2AFX,CCNB2,MRE11A,BLM,BRCA1,CDK1
Mitotic Roles of Polo-Like Kinase	4.49	0.161	CDC25C,PLK4,CDC20,PRC1,CDC7,CCNB2,PKMYT1,PPP2R1B,CDK1,KIF11
BER pathway	3.33	0.333	PCNA,POLE,FEN1,POLB
Zymosterol Biosynthesis	3.18	0.5	NSDHL,MSMO1,TM7SF2
GADD45 Signaling	2.51	0.211	PCNA,CCND2,BRCA1,CDK1
tRNA Splicing	2.49	0.161	PDE7A,PDE9A,TSEN54,PDE4D,PDE6D
Ovarian Cancer Signaling	2.47	0.0859	RAD51,MSH2,FZD3,SUV39H1,E2F1,MSH6,PRKAG2,PIK3CB,BRCA1,MLH1,PGF
Ketogenesis	2.44	0.3	BDH1,ACAT2,HMGCS1
Cyclins and Cell Cycle Regulation	2.42	0.104	CDKN2D,CCND2,SUV39H1,E2F1,CCNB2,PPP2R1B,CDK1,E2F2
Mevalonate Pathway I	2.32	0.273	ACAT2,HMGCR,HMGCS1
Cell Cycle: G2/M DNA Damage Checkpoint Regulation	2.28	0.122	CDC25C,CCNB2,PKMYT1,AURKA,BRCA1,CDK1
Estrogen-mediated S-phase Entry	2.13	0.167	E2F1,RBL1,CDK1,E2F2
DNA Double-Strand Break Repair by Homologous Recombination	2	0.214	RAD51,MRE11A,BRCA1
dTMP De Novo Biosynthesis	1.99	0.4	TYMS,SHMT1
Superpathway of Geranylgeranyldiphosphate Biosynthesis I (via Mevalonate)	1.92	0.2	ACAT2,HMGCR,HMGCS1
Sonic Hedgehog Signaling	1.84	0.138	ARRB2,PTCH1,PRKAG2,CDK1
Pyridoxal 5'-phosphate Salvage Pathway	1.79	0.0968	MAP3K9,DAPK1,PIM1,PRKAA2,TTK,CDK1
Cell Cycle: G1/S Checkpoint Regulation	1.76	0.0952	CDKN2D,CCND2,SUV39H1,E2F1,RBL1,E2F2
Ketolysis	1.69	0.286	BDH1,ACAT2
Pyrimidine Deoxyribonucleotides De Novo Biosynthesis I	1.63	0.158	TYMS,RRM2,RRM1
DNA damage-induced 14-3-3Ïƒ Signaling	1.63	0.158	CCNB2,BRCA1,CDK1
Salvage Pathways of Pyrimidine Ribonucleotides	1.61	0.0805	UPRT,MAP3K9,DAPK1,PIM1,PRKAA2,TTK,CDK1
Molecular Mechanisms of Cancer	1.6	0.054	RND2,CDC25C,FZD3,SUV39H1,PTCH1,RAPGEF3,AURKA,RBL1,RAC3,CDKN2D,CCND2,FANCD2,E2F1,RHOU,PRKAG2,PIK3CB,RHOF,BRCA1,E2F2
Glutamate Removal from Folates	1.48	1	GGH
Anandamide Degradation	1.48	1	FAAH
Methylglyoxal Degradation VI	1.48	1	LDHD
L-cysteine Degradation II	1.48	1	CTH
UDP-N-acetyl-D-galactosamine Biosynthesis I	1.48	1	GALE
Glioma Invasiveness Signaling	1.46	0.0909	RND2,HMMR,RHOU,PIK3CB,RHOF
Triacylglycerol Degradation	1.41	0.13	FAAH,ABHD6,LIPE
Phototransduction Pathway	1.41	0.103	RGS9,PRKAG2,GUCY1B3,PDE6D
Embryonic Stem Cell Differentiation into Cardiac Lineages	1.39	0.2	MESP1,SP4
Superpathway of Methionine Degradation	1.2	0.107	SUV39H2,GOT1,CTH
Epoxysqualene Biosynthesis	1.19	0.5	FDFT1
L-cysteine Degradation III	1.19	0.5	GOT1
Uridine-5'-phosphate Biosynthesis	1.19	0.5	UMPS
Cysteine Biosynthesis/Homocysteine Degradation	1.19	0.5	CTH
Putrescine Biosynthesis III	1.19	0.5	ODC1
Glycine Biosynthesis I	1.19	0.5	SHMT1
Glutamate Dependent Acid Resistance	1.19	0.5	GAD1
AMPK Signaling	1.16	0.0611	CHRNB1,PRKAA2,PRKAG2,LIPE,PIK3CB,HMGCR,PPP2R1B,PPAT
Triacylglycerol Biosynthesis	1.09	0.0968	ELOVL2,MBOAT2,PPAP2C
Glioma Signaling	1.08	0.0652	CDKN2D,SUV39H1,E2F1,PIK3CB,RBL1,E2F2
Cysteine Biosynthesis III (mammalia)	1.07	0.133	SUV39H2,CTH
Methylglyoxal Degradation I	1.02	0.333	HAGH
5-aminoimidazole Ribonucleotide Biosynthesis I	1.02	0.333	PPAT
1,25-dihydroxyvitamin D3 Biosynthesis	1.02	0.333	CYP2R1
Tetrahydrobiopterin Biosynthesis I	1.02	0.333	SPR
D-glucuronate Degradation I	1.02	0.333	DCXR
Tetrahydrobiopterin Biosynthesis II	1.02	0.333	SPR
Glutamate Degradation II	1.02	0.333	GOT1
Aspartate Biosynthesis	1.02	0.333	GOT1
p53 Signaling	1.01	0.0625	PCNA,CCND2,PPP1R13B,E2F1,PIK3CB,BRCA1
D-myo-inositol (1,4,5)-trisphosphate Degradation	0.972	0.118	INPP5F,OCRL
Cell Cycle Regulation by BTG Family Proteins	0.968	0.0857	E2F1,PPP2R1B,E2F2
Reelin Signaling in Neurons	0.94	0.0641	MAP3K9,MAPK8IP2,PIK3CB,CDK5R1,PAFAH1B3
1D-myo-inositol Hexakisphosphate Biosynthesis II (Mammalian)	0.93	0.111	INPP5F,OCRL
D-myo-inositol (1,3,4)-trisphosphate Biosynthesis	0.93	0.111	INPP5F,OCRL
Superpathway of Inositol Phosphate Compounds	0.902	0.0514	CDC25C,INPP5F,PPP1R13B,PPFIA3,DUSP23,PIK3CB,IP6K2,OCRL,PIP4K2C
L-cysteine Degradation I	0.901	0.25	GOT1
Glutamate Degradation III (via 4-aminobutyrate)	0.901	0.25	GAD1
Relaxin Signaling	0.896	0.0551	PDE7A,PDE9A,PRKAG2,PIK3CB,PDE4D,GUCY1B3,PDE6D
Induction of Apoptosis by HIV1	0.887	0.0678	TRAF2,SLC25A4,HTRA2,TNFRSF1B
Pancreatic Adenocarcinoma Signaling	0.874	0.0571	RAD51,SUV39H1,E2F1,PIK3CB,E2F2,PGF
Selenocysteine Biosynthesis II (Archaea and Eukaryotes)	0.811	0.2	PSTK
Lysine Degradation II	0.811	0.2	AADAT
Lysine Degradation V	0.811	0.2	AADAT
Galactose Degradation I (Leloir Pathway)	0.811	0.2	GALE
Folate Polyglutamylation	0.811	0.2	SHMT1
Regulation of Actin-based Motility by Rho	0.797	0.0575	RND2,RHOU,RHOF,RAC3,PIP4K2C
Superpathway of D-myo-inositol (1,4,5)-trisphosphate Metabolism	0.757	0.087	INPP5F,OCRL
Glioblastoma Multiforme Signaling	0.755	0.0504	RND2,FZD3,E2F1,RHOU,PIK3CB,RHOF,E2F2
Chronic Myeloid Leukemia Signaling	0.741	0.0549	SUV39H1,E2F1,PIK3CB,RBL1,E2F2
SAPK/JNK Signaling	0.741	0.0549	MAP3K9,TRAF2,MAPK8IP2,PIK3CB,RAC3
Small Cell Lung Cancer Signaling	0.7	0.0571	TRAF2,SUV39H1,E2F1,PIK3CB
Superpathway of Serine and Glycine Biosynthesis I	0.679	0.143	SHMT1
Inositol Pyrophosphates Biosynthesis	0.679	0.143	IP6K2
Salvage Pathways of Pyrimidine Deoxyribonucleotides	0.679	0.143	TK1
Mineralocorticoid Biosynthesis	0.679	0.143	EBP
Glycine Betaine Degradation	0.679	0.143	SHMT1
Aspartate Degradation II	0.679	0.143	GOT1
Colorectal Cancer Metastasis Signaling	0.654	0.0439	RND2,MSH2,FZD3,MSH6,RHOU,PRKAG2,PIK3CB,RHOF,MLH1,PGF
Role of p14/p19ARF in Tumor Suppression	0.651	0.0741	E2F1,PIK3CB
Acute Myeloid Leukemia Signaling	0.63	0.0533	PIM1,CEBPA,PIK3CB,PIM2
Glucocorticoid Biosynthesis	0.628	0.125	EBP
TNFR2 Signaling	0.628	0.0714	TRAF2,TNFRSF1B
Semaphorin Signaling in Neurons	0.626	0.0588	RND2,RHOU,RHOF
Cardiac Î²-adrenergic Signaling	0.626	0.0476	PDE7A,PDE9A,PRKAG2,PDE4D,PPP2R1B,PDE6D
Sphingosine-1-phosphate Signaling	0.619	0.0495	RND2,S1PR1,RHOU,PIK3CB,RHOF
IL-8 Signaling	0.612	0.0444	RND2,ARRB2,CCND2,RHOU,PIK3CB,RHOF,RAC3,PGF
Germ Cell-Sertoli Cell Junction Signaling	0.608	0.0455	RND2,MAP3K9,TUBA4A,RHOU,PIK3CB,RHOF,RAC3
Retinoate Biosynthesis I	0.606	0.069	ALDH1A3,RDH13
mTOR Signaling	0.604	0.0442	RND2,PRKAA2,RHOU,PRKAG2,PIK3CB,RHOF,PPP2R1B,PGF
Ceramide Signaling	0.591	0.0513	S1PR1,PIK3CB,TNFRSF1B,PPP2R1B
UDP-N-acetyl-D-galactosamine Biosynthesis II	0.584	0.111	GALE
Folate Transformations I	0.584	0.111	SHMT1
eNOS Signaling	0.569	0.0455	CHRNB1,PRKAA2,PRKAG2,PIK3CB,GUCY1B3,PGF
3-phosphoinositide Degradation	0.569	0.0455	CDC25C,INPP5F,PPP1R13B,PPFIA3,DUSP23,OCRL
Actin Nucleation by ARP-WASP Complex	0.551	0.0536	RND2,RHOU,RHOF
Breast Cancer Regulation by Stathmin1	0.551	0.0426	STMN1,E2F1,TUBA4A,PRKAG2,PIK3CB,PPP2R1B,CDK1,E2F2
Dolichyl-diphosphooligosaccharide Biosynthesis	0.545	0.1	ALG6
Type II Diabetes Mellitus Signaling	0.536	0.0459	TRAF2,PRKAA2,PRKAG2,PIK3CB,TNFRSF1B
Bladder Cancer Signaling	0.533	0.0482	DAPK1,SUV39H1,E2F1,PGF
Assembly of RNA Polymerase III Complex	0.511	0.0909	GTF3C3
Glutaryl-CoA Degradation	0.511	0.0909	ACAT2
Purine Nucleotides De Novo Biosynthesis II	0.511	0.0909	PPAT
Nucleotide Excision Repair Pathway	0.509	0.0588	RPA3,RPA2
3-phosphoinositide Biosynthesis	0.493	0.0426	CDC25C,PPP1R13B,PPFIA3,DUSP23,PIK3CB,PIP4K2C
LXR/RXR Activation	0.49	0.0439	FDFT1,CD14,ABCG1,TNFRSF1B,HMGCR
Androgen Biosynthesis	0.48	0.0833	EBP
Histamine Degradation	0.48	0.0833	ALDH1A3
HMGB1 Signaling	0.465	0.0427	RND2,RHOU,PIK3CB,TNFRSF1B,RHOF
Non-Small Cell Lung Cancer Signaling	0.462	0.0476	SUV39H1,E2F1,PIK3CB
Death Receptor Signaling	0.462	0.0444	TRAF2,PARP2,HTRA2,TNFRSF1B
Netrin Signaling	0.461	0.0541	PRKAG2,RAC3
Notch Signaling	0.461	0.0541	DLL3,HEY1
Isoleucine Degradation I	0.452	0.0769	ACAT2
Phenylalanine Degradation IV (Mammalian, via Side Chain)	0.452	0.0769	GOT1
Fatty Acid Î±-oxidation	0.452	0.0769	ALDH1A3
Methionine Degradation I (to Homocysteine)	0.452	0.0769	SUV39H2
IL-15 Signaling	0.451	0.0469	TRAF2,PIK3CB,RAC3
Production of Nitric Oxide and Reactive Oxygen Species in Macrophages	0.448	0.04	RND2,MAP3K9,RHOU,PIK3CB,TNFRSF1B,RHOF,PPP2R1B
Neuroprotective Role of THOP1 in Alzheimer's Disease	0.446	0.0526	ECE2,PRKAG2
DNA Double-Strand Break Repair by Non-Homologous End Joining	0.426	0.0714	MRE11A
Telomere Extension by Telomerase	0.426	0.0714	MRE11A
Colanic Acid Building Blocks Biosynthesis	0.426	0.0714	GALE
Oxidative Ethanol Degradation III	0.426	0.0714	ALDH1A3
Parkinson's Signaling	0.426	0.0714	SNCA
Nitric Oxide Signaling in the Cardiovascular System	0.425	0.0426	PRKAG2,PIK3CB,GUCY1B3,PGF
Adipogenesis pathway	0.425	0.041	FOXC2,FZD3,EZH2,CEBPA,SAP30
Insulin Receptor Signaling	0.41	0.0403	INPP5F,PRKAG2,LIPE,PIK3CB,OCRL
Melanoma Signaling	0.405	0.0488	E2F1,PIK3CB
Serotonin Receptor Signaling	0.405	0.0488	HTR7,SPR
CDP-diacylglycerol Biosynthesis I	0.403	0.0667	MBOAT2
G-Protein Coupled Receptor Signaling	0.393	0.0372	PDE7A,PDE9A,HTR7,S1PR1,PRKAG2,PIK3CB,PDE4D,RAPGEF3,PDE6D
IL-4 Signaling	0.39	0.0429	INPP5F,PIK3CB,OCRL
Natural Killer Cell Signaling	0.384	0.0404	INPP5F,PIK3CB,OCRL,RAC3
D-myo-inositol-5-phosphate Metabolism	0.382	0.0391	CDC25C,PPP1R13B,PPFIA3,DUSP23,PIP4K2C
RAN Signaling	0.382	0.0625	CSE1L
Granzyme B Signaling	0.382	0.0625	LMNB1
Tryptophan Degradation X (Mammalian, via Tryptamine)	0.382	0.0625	ALDH1A3
Putrescine Degradation III	0.382	0.0625	ALDH1A3
Ethanol Degradation IV	0.382	0.0625	ALDH1A3
BMP signaling pathway	0.371	0.0417	PRKAG2,HOXC9,NOG
Phosphatidylglycerol Biosynthesis II (Non-plastidic)	0.362	0.0588	MBOAT2
Tryptophan Degradation III (Eukaryotic)	0.362	0.0588	ACAT2
Rac Signaling	0.361	0.0392	IQGAP2,PIK3CB,PIP4K2C,CDK5R1
Role of Oct4 in Mammalian Embryonic Stem Cell Pluripotency	0.357	0.0444	CCNF,BRCA1
PDGF Signaling	0.354	0.0405	INPP5F,PIK3CB,OCRL
Fc Epsilon RI Signaling	0.347	0.0385	INPP5F,PIK3CB,OCRL,RAC3
Ephrin A Signaling	0.346	0.0435	EFNA3,PIK3CB
Aryl Hydrocarbon Receptor Signaling	0.343	0.0373	CCND2,ALDH1A3,E2F1,RBL1,MCM7
Dopamine Receptor Signaling	0.329	0.039	PRKAG2,SPR,PPP2R1B
Dopamine Degradation	0.327	0.0526	ALDH1A3
Prostate Cancer Signaling	0.313	0.038	SUV39H1,E2F1,PIK3CB
DNA Methylation and Transcriptional Repression Signaling	0.311	0.05	SAP30
Aldosterone Signaling in Epithelial Cells	0.308	0.0357	DNAJC9,PIK3CB,DNAJB1,PIP4K2C,HSPA4L
Endometrial Cancer Signaling	0.306	0.04	PIK3CB,MLH1
Amyloid Processing	0.306	0.04	PRKAG2,CDK5R1
14-3-3-mediated Signaling	0.301	0.036	TRAF2,TUBA4A,PIK3CB,SNCA
CD27 Signaling in Lymphocytes	0.297	0.0392	MAP3K9,TRAF2
Endoplasmic Reticulum Stress Pathway	0.296	0.0476	TRAF2
Cellular Effects of Sildenafil (Viagra)	0.289	0.0354	SLC4A11,PRKAG2,PDE4D,GUCY1B3
Unfolded protein response	0.288	0.0385	TRAF2,CEBPA
cAMP-mediated signaling	0.282	0.034	PDE7A,PDE9A,HTR7,S1PR1,PDE4D,RAPGEF3,PDE6D
Polyamine Regulation in Colon Cancer	0.282	0.0455	ODC1
Lymphotoxin Î² Receptor Signaling	0.279	0.0377	TRAF2,PIK3CB
D-myo-inositol (1,4,5,6)-Tetrakisphosphate Biosynthesis	0.277	0.0348	CDC25C,PPP1R13B,PPFIA3,DUSP23
D-myo-inositol (3,4,5,6)-tetrakisphosphate Biosynthesis	0.277	0.0348	CDC25C,PPP1R13B,PPFIA3,DUSP23
IL-6 Signaling	0.277	0.0348	TRAF2,CD14,PIK3CB,TNFRSF1B
RANK Signaling in Osteoclasts	0.272	0.0353	MAP3K9,TRAF2,PIK3CB
PTEN Signaling	0.271	0.0345	INPP5F,PIK3CB,OCRL,RAC3
Role of PI3K/AKT Signaling in the Pathogenesis of Influenza	0.271	0.037	PIK3CB,MLH1
D-myo-inositol (1,4,5)-Trisphosphate Biosynthesis	0.269	0.0435	PIP4K2C
Glutathione-mediated Detoxification	0.269	0.0435	GGH
Glycolysis I	0.269	0.0435	ENO2
ILK Signaling	0.266	0.0335	RND2,RHOU,PIK3CB,RHOF,PPP2R1B,PGF
Apoptosis Signaling	0.265	0.0349	HTRA2,TNFRSF1B,CDK1
Factors Promoting Cardiogenesis in Vertebrates	0.259	0.0345	FZD3,CDC6,NOG
Pyrimidine Ribonucleotides De Novo Biosynthesis	0.257	0.0417	UMPS
Gluconeogenesis I	0.257	0.0417	ENO2
PI3K/AKT Signaling	0.255	0.0336	INPP5F,PIK3CB,PPP2R1B,OCRL
Ethanol Degradation II	0.246	0.04	ALDH1A3
Antiproliferative Role of Somatostatin Receptor 2	0.234	0.0339	PIK3CB,GUCY1B3
Retinol Biosynthesis	0.215	0.0357	LIPE
Noradrenaline and Adrenaline Degradation	0.215	0.0357	ALDH1A3
Role of JAK2 in Hormone-like Cytokine Signaling	0.197	0.0333	EPOR

## Sheet: cluster_2
Ingenuity Canonical Pathways	-log(p-value)	Ratio	Molecules
EIF2 Signaling	10.1	0.307	RPLP2,PDPK1,HRAS,KRAS,EIF4A2,PIK3R4,RPS23,RPS11,EIF1,EIF3B,RPS13,EIF3D,EIF5,PAIP1,GSK3B,RPL36,PPP1CA,PABPC1,RPL27,EIF2B3,EIF3E,RPL37A,EIF3M,FAU,RPL8,PPP1R15A,EIF2B5,EIF3K,PIK3CA,EIF2B4,RPL22L1,PPP1CC,UBA52,PIK3C3,EIF3A,RPS5,RPL31,RPL18,RPL4,NRAS,EIF3H,GRB2,RPS19,RPL23,RPS4Y1,RPS16,RPL28,EIF4A1,EIF3I,RPL37,EIF3L
Regulation of eIF4 and p70S6K Signaling	6.64	0.279	PIK3CA,EIF2B4,PPP2R5B,PDPK1,HRAS,KRAS,EIF4A2,PIK3R4,RPS23,RPS11,MTOR,EIF1,EIF3B,EIF3D,RPS13,PIK3C3,MKNK1,PAIP1,EIF3A,RPS5,PABPC1,RPS6KB1,NRAS,EIF3H,GRB2,RPS19,EIF2B3,ITGA5,EIF3E,EIF3M,FAU,RPS4Y1,RPS16,EIF4A1,EIF2B5,EIF3I,PPP2R5E,EIF3L,EIF3K
Protein Ubiquitination Pathway	6.44	0.234	USP45,PSMA7,UBR2,UBE2D2,PSMC5,USP7,HSPA4,USP8,USP10,NEDD4L,PSMB5,DNAJC27,USP9X,PSMD5,DNAJC2,THOP1,TRAF6,UBE2G2,ANAPC4,DNAJC5,CBL,UBE2H,UBE2G1,PSMA5,HSPB11,PSMB1,DNAJB6,UBE2J2,PSMB3,HSPB3,PSMD7,CUL1,CDC23,USP39,SMURF1,UCHL1,USO1,USP27X,USP47,USP16,UBE2M,PSMB6,USP33,UBE3A,PSMD8,HSPA12A,DNAJC11,UBE2E2,USP37,USP46,BTRC,CDC34,UBA1,PSMC3,DNAJB5,DNAJC7,USP25
Insulin Receptor Signaling	4.81	0.258	TSC1,FYN,PIK3CA,EIF2B4,TRIP10,PDPK1,HRAS,KRAS,GSK3A,PIK3R4,MTOR,PPP1CC,GYS1,PPP1R12A,PIK3C3,RPS6KB2,RPTOR,GSK3B,PPP1CA,RPS6KB1,NRAS,GRB2,CRKL,PRKAR2A,PPP1R14A,EIF2B3,ACLY,GRB10,PRKAR2B,CBL,EIF2B5,PRKACA
Assembly of RNA Polymerase II Complex	4.69	0.354	TAF12,TAF9,TAF11,POLR2F,CCNH,POLR2D,TBP,POLR2J,GTF2F1,GTF2E2,POLR2B,GTF2A1,POLR2A,TAF4,GTF2E1,ERCC3,TAF3
Estrogen Receptor Signaling	3.99	0.242	MED13,POLR2F,TAF11,POLR2D,MED23,POLR2J,HRAS,KRAS,POLR2B,GTF2A1,SMARCA4,EP300,POLR2A,TAF3,TAF12,TAF9,SRC,PELP1,CCNH,NRAS,MED1,GRB2,PHB2,TBP,HNRNPD,GTF2F1,NCOA3,TAF4,GTF2E1,ERCC3
Huntington's Disease Signaling	3.92	0.208	PIK3CA,POLR2F,POLR2D,VTI1A,REST,GNB2L1,CLTB,POLR2J,NAPG,PDPK1,HRAS,POLR2B,PIK3R4,EP300,GNB1,HDAC6,NSF,HSPA4,DYNC1I2,MTOR,POLR2A,PIK3C3,VAMP3,DLG4,GOSR1,GNB1L,CAPN10,DNM2,HDAC2,YKT6,GRB2,CLTC,HDAC1,APAF1,TBP,MAPK9,HIP1,PSME3,DNAJC5,ATP5B,TAF4,CAPN1,STX16,CAPN7,GOSR2
Colanic Acid Building Blocks Biosynthesis	3.27	0.5	GMPPB,TSTA3,GPI,GALK2,GMPPA,UGP2,GMDS
mTOR Signaling	3.17	0.204	TSC1,PIK3CA,RHOT2,PPP2R5B,PDPK1,HRAS,KRAS,EIF4A2,PIK3R4,RPS23,RPS11,VEGFA,MTOR,EIF3B,EIF3D,RPS13,RHOT1,PIK3C3,RPTOR,RPS6KB2,EIF3A,RPS5,GNB1L,RPS6KB1,NRAS,EIF3H,RPS19,EIF3E,EIF3M,FAU,RPS4Y1,RPS16,EIF4A1,EIF3I,PPP2R5E,EIF3L,EIF3K
CMP-N-acetylneuraminate Biosynthesis I (Eukaryotes)	3.04	0.8	GNE,NAGK,CMAS,NANP
Mitochondrial Dysfunction	2.58	0.198	HSD17B10,FURIN,COX6C,RHOT2,COX8A,ACO2,COX7A2L,PSENEN,NDUFA2,PDHA1,NDUFB9,NDUFS1,NDUFS6,NDUFA10,ATP5F1,COX4I1,NDUFA8,AIFM1,ATP5A1,GLRX2,MAPK9,NDUFS3,UQCRB,GSR,ATP5C1,PRDX3,ATP5B,UQCR10,NDUFA6,UQCRC2,COX7A2,UQCRC1
Integrin Signaling	2.46	0.188	FYN,RAP2A,PIK3CA,ARHGAP26,RALA,MAP3K11,ARHGEF7,RHOT2,WASL,HRAS,KRAS,PIK3R4,ITGB3,BRAF,PTK2,ITGAE,PPP1R12A,RHOT1,PIK3C3,ILKAP,GSK3B,VASP,CAPN10,MYL12A,SRC,PAK4,NRAS,GRB2,CRKL,ITGA6,ITGA5,GIT1,ARPC1A,CAPN1,CAPN7,TSPAN6
TCA Cycle II (Eukaryotic)	2.42	0.348	SUCLA2,CS,DHTKD1,SUCLG1,ACO2,DLD,MDH2,IDH3B
Inositol Pyrophosphates Biosynthesis	2.28	0.571	IPPK,IP6K1,IP6K2,PPIP5K2
Assembly of RNA Polymerase III Complex	2.23	0.455	BDP1,GTF3C2,GTF3C5,TBP,SF3A1
Glutaryl-CoA Degradation	2.23	0.455	HSD17B10,HSD17B4,HADHA,HADH,GCDH
IGF-1 Signaling	2.12	0.211	RPS6KB1,PIK3CA,YWHAG,NRAS,GRB2,PRKAR2A,SRF,HRAS,PDPK1,SOCS4,KRAS,PIK3R4,GRB10,PTK2,CSNK2A2,PRKAR2B,PIK3C3,RPS6KB2,PRKACA,SOCS7
RAN Signaling	2.1	0.375	KPNB1,KPNA3,KPNA6,RCC1,RANGAP1,IPO5
Oxidative Phosphorylation	2.08	0.206	COX6C,ATP5A1,COX8A,COX7A2L,NDUFS3,NDUFA2,UQCRB,ATP5C1,NDUFS1,NDUFB9,ATP5B,UQCR10,NDUFA6,UQCRC2,COX7A2,NDUFS6,NDUFA10,UQCRC1,ATP5F1,COX4I1,NDUFA8
Hereditary Breast Cancer Signaling	2.05	0.202	POLR2F,PIK3CA,NRAS,POLR2D,HDAC2,TUBG1,HDAC1,POLR2J,HRAS,RPA1,RFC1,KRAS,POLR2B,PIK3R4,SMARCA4,EP300,HDAC6,PALB2,POLR2A,PIK3C3,ATR,HLTF
CNTF Signaling	2.04	0.25	LIFR,RPS6KB1,MTOR,PIK3CA,NRAS,GRB2,PIK3C3,TYK2,RPS6KB2,HRAS,KRAS,PIK3R4
FAK Signaling	2.04	0.214	FYN,SRC,PAK4,PIK3CA,ARHGAP26,NRAS,GRB2,ARHGEF7,HRAS,PDPK1,ITGA5,KRAS,PIK3R4,PTK2,PIK3C3,CAPN1,CAPN7,CAPN10
Androgen Signaling	2.01	0.2	SRC,CCNH,POLR2F,POLR2D,GNB2L1,TBP,POLR2J,PRKAR2A,GTF2F1,GTF2E2,POLR2B,GTF2A1,EP300,GNB1,HSPA4,CALM1 (includes others),PRKAR2B,POLR2A,GTF2E1,ERCC3,PRKACA,GNB1L
SAPK/JNK Signaling	2	0.209	PIK3CA,MAP3K11,NRAS,GRB2,NFATC3,CRKL,HRAS,MAPK9,KRAS,MAP3K5,PIK3R4,NFATC1,HNRNPK,GNB1,PIK3C3,MAP3K7,DUSP4,MAP4K5,MAP3K2
PI3K/AKT Signaling	1.9	0.193	RPS6KB1,TSC1,PIK3CA,CDC37,YWHAG,NRAS,GRB2,NFKBIE,PPP2R5B,TYK2,ITGA5,HRAS,PDPK1,KRAS,GSK3A,MAP3K5,MTOR,GYS1,NFKBIA,RPS6KB2,GSK3B,PPP2R5E,CTNNB1
Methionine Degradation I (to Homocysteine)	1.87	0.385	PRMT3,PRMT5,FTSJ1,AHCYL2,PRMT1
Superpathway of Methionine Degradation	1.86	0.286	PRMT3,PRMT5,DLD,FTSJ1,AHCYL2,MUT,GOT2,PRMT1
Tetrahydrofolate Salvage from 5,10-methenyltetrahydrofolate	1.85	0.6	MTHFD2,MTHFD1,GART
Spliceosomal Cycle	1.85	1	LOC102724594/U2AF1,U2AF2
GDP-L-fucose Biosynthesis I (from GDP-D-mannose)	1.85	1	TSTA3,GMDS
Hypoxia Signaling in the Cardiovascular System	1.83	0.222	UBE2M,COPS5,NFKBIE,UBE2D2,EP300,UBE2G2,VEGFA,NFKBIA,UBE2H,UBE2G1,HIF1AN,UBE2E2,CDC34,UBE2J2
ERK/MAPK Signaling	1.82	0.176	HSPB3,FYN,PIK3CA,PPP2R5B,SRF,HRAS,KRAS,PIK3R4,NFATC1,EP300,PTK2,BRAF,PPP1CC,PPP1R12A,PIK3C3,MKNK1,PPP1CA,PPARG,ETS1,SRC,PAK4,YWHAG,NRAS,GRB2,CRKL,PRKAR2A,PPP1R14A,ITGA5,PRKAR2B,PRKACA,DUSP4,PPP2R5E
Assembly of RNA Polymerase I Complex	1.81	0.444	POLR1D,POLR1C,TAF1C,TBP
Nucleotide Excision Repair Pathway	1.81	0.265	POLR2F,CCNH,POLR2A,POLR2D,ERCC3,POLR2J,RPA1,POLR2B,RAD23B
Angiopoietin Signaling	1.77	0.219	PAK4,PIK3CA,NRAS,GRB2,NFKBIE,HRAS,KRAS,PIK3R4,BIRC5,PTK2,NFKBIA,PIK3C3,IKBKAP,STAT5B
Erythropoietin Signaling	1.72	0.215	RPS6KB1,SRC,PIK3CA,NRAS,GRB2,NFKBIE,PDPK1,HRAS,KRAS,PIK3R4,NFKBIA,CBL,PIK3C3,STAT5B
Virus Entry via Endocytic Pathways	1.67	0.2	FLNB,FYN,SRC,PIK3CA,NRAS,AP2B1,CLTB,CLTC,ITGA6,HRAS,ITGA5,KRAS,AP1B1,PIK3R4,ITGB3,PIK3C3,DNM2
Glucocorticoid Receptor Signaling	1.66	0.163	TAF11,PIK3CA,POLR2F,POLR2D,NFATC3,NFKBIE,POLR2J,HRAS,KRAS,GTF2E2,POLR2B,GTF2A1,PIK3R4,SMARCA4,NFATC1,EP300,HSPA4,NFKBIA,POLR2A,PIK3C3,MAP3K7,TAF3,STAT5B,TAF12,TAF9,SMAD2,CCNH,NRAS,MED1,GRB2,TBP,MAPK9,GTF2F1,NCOA3,TRAF6,POU2F1,TAF4,GTF2E1,ERCC3,PRKACA,HLTF
Prostate Cancer Signaling	1.65	0.203	PIK3CA,NRAS,PA2G4,TFDP1,GRB2,NFKBIE,PDPK1,HRAS,KRAS,PIK3R4,EP300,MTOR,NFKBIA,PIK3C3,GSK3B,CTNNB1
GDP-mannose Biosynthesis	1.59	0.5	GMPPB,GPI,GMPPA
Cysteine Biosynthesis III (mammalia)	1.59	0.333	PRMT3,PRMT5,FTSJ1,AHCYL2,PRMT1
ErbB2-ErbB3 Signaling	1.58	0.218	PIK3CA,NRAS,GRB2,PIK3C3,TYK2,PDPK1,HRAS,KRAS,GSK3A,GSK3B,STAT5B,PIK3R4
Actin Nucleation by ARP-WASP Complex	1.52	0.214	NRAS,ARPC1A,PPP1R12A,RHOT1,GRB2,RHOT2,BAIAP2,WASL,ITGA5,HRAS,KRAS,VASP
Endometrial Cancer Signaling	1.51	0.22	PIK3CA,NRAS,GRB2,PIK3C3,CTNNA1,PDPK1,HRAS,KRAS,GSK3B,PIK3R4,CTNNB1
Non-Small Cell Lung Cancer Signaling	1.49	0.206	STK4,PIK3CA,NRAS,PA2G4,TFDP1,GRB2,PIK3C3,ITPR3,HRAS,PDPK1,KRAS,RASSF5,PIK3R4
Systemic Lupus Erythematosus Signaling	1.48	0.166	CD2BP2,PIK3CA,PRPF19,NFATC3,TXNL4A,HNRNPA2B1,PRPF39,HRAS,KRAS,PIK3R4,NFATC1,SNRNP48,MTOR,RNPC3,EFTUD2,PIK3C3,PRPF40A,SNRPD3,NHP2L1,PRPF31,SNRNP40,LSM6,NRAS,GRB2,PRPF38B,PRPF18,CBL,CD40,SNRPC,SNRNP200,SNRNP70,SF3B4
Purine Nucleotides De Novo Biosynthesis II	1.48	0.364	ADSL,GMPS,PAICS,GART
Granzyme B Signaling	1.47	0.312	ENDOG,APAF1,BID,LMNB2,PARP1
Small Cell Lung Cancer Signaling	1.46	0.2	TRAF6,PTK2,PIK3CA,TRAF3,NFKBIA,TFDP1,PA2G4,PIK3C3,NFKBIE,TRAF4,APAF1,BID,PIK3R4,CDKN2B
AMPK Signaling	1.44	0.176	CAB39,TSC1,RPS6KB1,SRC,PIK3CA,PPP2R5B,PRKAR2A,PDPK1,PIK3R4,SMARCA4,PFKFB2,PPM1D,PFKM,MTOR,PRKAR2B,GYS1,PPM1B,PIK3C3,RPTOR,PRKACA,PPP2R5E,AK2,HLTF
Cyclins and Cell Cycle Regulation	1.44	0.195	E2F4,CCNH,TFDP1,HDAC2,PA2G4,PPP2R5B,CUL1,HDAC1,E2F3,CDKN2B,HDAC6,ATR,BTRC,GSK3B,PPP2R5E
NGF Signaling	1.43	0.183	RPS6KB1,PIK3CA,MAP3K11,NRAS,GRB2,HRAS,PDPK1,MAPK9,KRAS,MAP3K5,PIK3R4,EP300,TRAF6,SMPD4,PIK3C3,TRAF4,RPS6KB2,MAP3K7,MAP3K2
Breast Cancer Regulation by Stathmin1	1.42	0.165	PIK3CA,CAMK1,CAMK1D,ARHGEF7,GNB2L1,PPP2R5B,HRAS,KRAS,PIK3R4,E2F3,GNB1,PPP1CC,PPP1R12A,PIK3C3,RB1CC1,GNB1L,PPP1CA,E2F4,NRAS,GRB2,TUBG1,TUBB2A,PRKAR2A,ADCY6,PPP1R14A,CALM1 (includes others),PRKAR2B,ITPR3,PRKACA,UHMK1,PPP2R5E
B Cell Receptor Signaling	1.41	0.168	RAP2A,PIK3CA,MAP3K11,NFATC3,NFKBIE,HRAS,PDPK1,GSK3A,KRAS,MAP3K5,PIK3R4,NFATC1,EP300,PTK2,MTOR,NFKBIA,PIK3C3,MAP3K7,RPS6KB2,RASSF5,GSK3B,MAP3K2,ETS1,RPS6KB1,NRAS,GRB2,MAPK9,CALM1 (includes others)
3-phosphoinositide Degradation	1.41	0.174	TMEM55B,PPP1R8,PPP2R5B,MTMR14,PPTC7,PPP1R14A,IGBP1,STYXL1,PPP4R1,SET,NUDT5,ITPK1,ATP1A1,PPP1CC,PPP1R12A,MTM1,PGAM5,ILKAP,MTMR2,PPP2R5E,PPP1CA,SIRPA,DUSP16
Inosine-5'-phosphate Biosynthesis II	1.41	0.667	ADSL,PAICS
1D-myo-inositol Hexakisphosphate Biosynthesis V (from Ins(1,3,4)P3)	1.41	0.667	ITPK1,IPPK
Reelin Signaling in Neurons	1.39	0.192	FYN,SRC,PIK3CA,MAP3K11,CRKL,ITGA6,ITGA5,MAPK9,PIK3R4,ITGB3,YES1,PIK3C3,LRP8,GSK3B,PAFAH1B1
Remodeling of Epithelial Adherens Junctions	1.39	0.2	SRC,RALA,TUBB2A,TUBG1,CTNNA1,RAB7A,MAPRE2,MET,ARPC1A,EXOC2,CTNNB1,DNM2,MAPRE3
RANK Signaling in Osteoclasts	1.38	0.188	SRC,PIK3CA,MAP3K11,NFKBIE,TAB2,MAPK9,MAP3K5,PIK3R4,NFATC1,TRAF6,CALM1 (includes others),CBL,NFKBIA,PIK3C3,MAP3K7,MAP3K2
FcÎ³RIIB Signaling in B Lymphocytes	1.37	0.225	PIK3CA,NRAS,GRB2,PIK3C3,MAPK9,PDPK1,HRAS,KRAS,PIK3R4
Glioma Signaling	1.37	0.185	PIK3CA,E2F4,CAMK1,NRAS,PA2G4,TFDP1,CAMK1D,GRB2,PDGFA,HRAS,KRAS,E2F3,PIK3R4,CDKN2B,CALM1 (includes others),MTOR,PIK3C3
Antiproliferative Role of Somatostatin Receptor 2	1.36	0.203	GNB1,BRAF,SRC,PIK3CA,NRAS,PIK3C3,GNB2L1,HRAS,SST,KRAS,GNB1L,PIK3R4
Tryptophan Degradation III (Eukaryotic)	1.36	0.294	HSD17B10,HSD17B4,HADHA,HADH,GCDH
Lymphotoxin Î² Receptor Signaling	1.34	0.208	TRAF6,TRAF3,PIK3CA,NFKBIA,PIK3C3,TRAF4,APAF1,PDPK1,IKBKAP,PIK3R4,EP300
Cleavage and Polyadenylation of Pre-mRNA	1.34	0.333	PAPOLA,NUDT21,CPSF3,WDR33
Macropinocytosis Signaling	1.34	0.197	MET,SRC,PIK3CA,NRAS,PDGFA,PIK3C3,ANKFY1,USP6NL,HRAS,ITGA5,KRAS,PIK3R4,ITGB3
PAK Signaling	1.3	0.184	PAK4,PIK3CA,NRAS,GRB2,PDGFA,ARHGEF7,WASL,HRAS,ITGA5,MAPK9,KRAS,PIK3R4,GIT1,PTK2,PIK3C3,MYL12A
EGF Signaling	1.29	0.204	RPS6KB1,SRC,CSNK2A2,MTOR,PIK3CA,GRB2,PIK3C3,ITPR3,SRF,HRAS,PIK3R4
D-myo-inositol (1,4,5,6)-Tetrakisphosphate Biosynthesis	1.28	0.174	PPP1R8,PPP2R5B,PPTC7,PPP1R14A,IGBP1,STYXL1,PPP4R1,SET,NUDT5,ITPK1,PPP1CC,ATP1A1,PPP1R12A,PGAM5,MTMR2,ILKAP,PPP2R5E,PPP1CA,SIRPA,DUSP16
D-myo-inositol (3,4,5,6)-tetrakisphosphate Biosynthesis	1.28	0.174	PPP1R8,PPP2R5B,PPTC7,PPP1R14A,IGBP1,STYXL1,PPP4R1,SET,NUDT5,ITPK1,PPP1CC,ATP1A1,PPP1R12A,PGAM5,MTMR2,ILKAP,PPP2R5E,PPP1CA,SIRPA,DUSP16
NRF2-mediated Oxidative Stress Response	1.27	0.163	PIK3CA,NQO2,HRAS,GCLC,KRAS,MAP3K5,PIK3R4,EP300,CUL3,PIK3C3,MAP3K7,DNAJA3,TXN,GSK3B,CBR1,NRAS,SOD1,GSTM3,MAPK9,DNAJC11,GSR,DNAJC5,CDC34,DNAJB6,PTPLAD1,DNAJC7,DNAJB5,MGST3
Melanocyte Development and Pigmentation Signaling	1.23	0.183	RPS6KB1,SRC,PIK3CA,NRAS,GRB2,PRKAR2A,ADCY6,HRAS,KRAS,PIK3R4,EP300,PRKAR2B,PIK3C3,RPS6KB2,PRKACA
Isoleucine Degradation I	1.23	0.308	HSD17B10,DLD,ACADSB,HADHA
Mitotic Roles of Polo-Like Kinase	1.22	0.194	SLK,ANAPC4,CAPN1,PPP2R5B,FBXO5,CDC23,ANAPC7,PPP2R5E,STAG2,CDC27,RAD21,SMC1A
Superpathway of Inositol Phosphate Compounds	1.2	0.16	PIK3CA,PPP2R5B,IPPK,IGBP1,STYXL1,PIK3R4,SET,PPP1CC,ATP1A1,PPP1R12A,PIK3C3,PGAM5,IP6K1,ILKAP,MTMR2,IP6K2,PPP1CA,TMEM55B,PPP1R8,PPTC7,PPP1R14A,PPP4R1,NUDT5,ITPK1,PPP2R5E,PPIP5K2,SIRPA,DUSP16
tRNA Charging	1.18	0.216	YARS2,RARS,FARS2,TARSL2,LARS2,HARS,TARS,FARSB
Cell Cycle: G1/S Checkpoint Regulation	1.18	0.19	HDAC6,E2F4,TFDP1,HDAC2,PA2G4,CUL1,HDAC1,BTRC,ATR,GSK3B,E2F3,CDKN2B
Caveolar-mediated Endocytosis Signaling	1.17	0.186	FLNB,FYN,SRC,ITGA6,COPE,ITGA5,COPG2,COPB2,DYRK3,ITGB3,ITGAE,DNM2,MAP3K2
FLT3 Signaling in Hematopoietic Progenitor Cells	1.17	0.186	RPS6KB1,PIK3CA,NRAS,GRB2,PDPK1,HRAS,KRAS,PIK3R4,EP300,MTOR,CBL,PIK3C3,STAT5B
Prolactin Signaling	1.17	0.186	FYN,PIK3CA,NRAS,GRB2,PDPK1,HRAS,KRAS,SOCS4,PIK3R4,EP300,PIK3C3,STAT5B,SOCS7
JAK/Stat Signaling	1.17	0.186	PIK3CA,NRAS,GRB2,TYK2,HRAS,KRAS,SOCS4,PIK3R4,MTOR,PIAS4,PIK3C3,STAT5B,SOCS7
IL-4 Signaling	1.17	0.186	RPS6KB1,MTOR,PIK3CA,NRAS,NFATC3,GRB2,PIK3C3,TYK2,RPS6KB2,HRAS,KRAS,PIK3R4,NFATC1
Role of NFAT in Cardiac Hypertrophy	1.16	0.16	PIK3CA,CAMK1,CAMK1D,GNB2L1,HRAS,KRAS,PIK3R4,EP300,GNB1,HDAC6,PIK3C3,MAP3K7,GSK3B,GNB1L,SRC,NRAS,HDAC2,GRB2,HDAC1,PRKAR2A,ADCY6,MAPK9,MEF2B,CALM1 (includes others),PRKAR2B,ITPR3,PRKACA
Chronic Myeloid Leukemia Signaling	1.15	0.176	PIK3CA,E2F4,NRAS,PA2G4,TFDP1,HDAC2,GRB2,CRKL,HDAC1,HRAS,KRAS,PIK3R4,E2F3,HDAC6,PIK3C3,STAT5B
Myc Mediated Apoptosis Signaling	1.15	0.193	PIK3CA,YWHAG,NRAS,GRB2,PIK3C3,APAF1,MAPK9,BID,HRAS,KRAS,PIK3R4
2-ketoglutarate Dehydrogenase Complex	1.14	0.5	DHTKD1,DLD
Heme Degradation	1.14	0.5	BLVRA,HMOX2
N-acetylglucosamine Degradation II	1.14	0.5	NAGK,GNPDA2
Molybdenum Cofactor Biosynthesis	1.14	0.5	MOCS2,GPHN
RAR Activation	1.14	0.159	SRC,SMAD2,PIK3CA,CCNH,SMAD9,RDH11,MED1,ADCY6,PRKAR2A,MAPK9,PDPK1,SNW1,MAP3K5,PSMC5,SMARCA4,PRMT1,PARP1,EP300,VEGFA,CSNK2A2,PRKAR2B,TAF4,ERCC3,PRKACA,STAT5B,HLTF,SCAND1
3-phosphoinositide Biosynthesis	1.14	0.163	PIK3CA,PPP1R8,PPP2R5B,PPTC7,PPP1R14A,IGBP1,STYXL1,PPP4R1,PIK3R4,SET,NUDT5,ITPK1,ATP1A1,PPP1CC,PPP1R12A,PIK3C3,PGAM5,ILKAP,MTMR2,PPP2R5E,PPP1CA,SIRPA,DUSP16
Docosahexaenoic Acid (DHA) Signaling	1.12	0.211	PIK3CA,PIK3C3,APAF1,BID,PDPK1,GSK3A,GSK3B,PIK3R4
DNA Double-Strand Break Repair by Homologous Recombination	1.12	0.286	LIG1,GEN1,POLA1,RPA1
DNA Double-Strand Break Repair by Non-Homologous End Joining	1.12	0.286	WRN,DCLRE1C,XRCC5,PARP1
CD27 Signaling in Lymphocytes	1.12	0.196	NFKBIA,MAP3K11,NFKBIE,APAF1,MAP3K7,MAPK9,BID,IKBKAP,MAP3K5,MAP3K2
HIPPO signaling	1.12	0.176	TEAD4,SMAD2,YWHAG,PPP2R5B,CUL1,PPP1R14A,ITCH,STK4,PPP1CC,PPP1R12A,DLG4,BTRC,MOB1A,PPP2R5E,PPP1CA
D-myo-inositol-5-phosphate Metabolism	1.1	0.164	TMEM55B,PPP1R8,PPP2R5B,PPTC7,PPP1R14A,IGBP1,STYXL1,PPP4R1,SET,NUDT5,ITPK1,ATP1A1,PPP1CC,PPP1R12A,PGAM5,MTMR2,ILKAP,PPP2R5E,PPP1CA,SIRPA,DUSP16
DNA Methylation and Transcriptional Repression Signaling	1.09	0.25	HDAC2,MBD3,HDAC1,MTA2,SUDS3
NF-ÎºB Activation by Viruses	1.09	0.181	PIK3CA,NRAS,NFKBIE,ITGA6,TBP,ITGA5,HRAS,KRAS,PIK3R4,ITGB3,NFKBIA,PIK3C3,IKBKAP
UDP-N-acetyl-D-galactosamine Biosynthesis II	1.09	0.333	GPI,PGM3,GNPDA2
VEGF Signaling	1.05	0.172	SRC,PIK3CA,EIF2B4,NRAS,GRB2,HRAS,EIF2B3,KRAS,PIK3R4,ELAVL1,VEGFA,PTK2,EIF1,PIK3C3,EIF2B5
Role of p14/p19ARF in Tumor Suppression	1.03	0.222	PIK3CA,PIK3C3,SENP3,TTF1,SF3A1,PIK3R4
HGF Signaling	1.02	0.167	ETS1,PIK3CA,MAP3K11,NRAS,GRB2,CRKL,HRAS,ITGA5,MAPK9,KRAS,MAP3K5,PIK3R4,MET,PTK2,PIK3C3,MAP3K7,MAP3K2
Role of PKR in Interferon Induction and Antiviral Response	1.02	0.2	TRAF6,TRAF3,NFKBIA,NFKBIE,TAB2,APAF1,MAP3K7,BID
B Cell Activating Factor Signaling	1.02	0.2	TRAF6,TRAF3,NFKBIA,NFATC3,NFKBIE,MAPK9,IKBKAP,NFATC1
Renal Cell Carcinoma Signaling	1.02	0.179	VEGFA,MET,ETS1,PAK4,PIK3CA,NRAS,GRB2,PIK3C3,HRAS,KRAS,PIK3R4,EP300
PDGF Signaling	1.01	0.176	SRC,PIK3CA,NRAS,GRB2,PDGFA,CRKL,TYK2,SRF,HRAS,KRAS,PIK3R4,CSNK2A2,PIK3C3
Germ Cell-Sertoli Cell Junction Signaling	0.992	0.156	SRC,PAK4,PIK3CA,MAP3K11,NRAS,TUBG1,WASL,TUBB2A,RHOT2,CTNNA1,ITGA6,MAPK9,PDPK1,HRAS,KRAS,MAP3K5,PIK3R4,PTK2,RHOT1,PIK3C3,MAP3K7,MTMR2,CTNNB1,MAP3K2
Estrogen-Dependent Breast Cancer Signaling	0.982	0.18	HSD17B10,SRC,PIK3CA,NRAS,PIK3C3,HRAS,KRAS,STAT5B,PIK3R4,HSD17B4,EP300
14-3-3-mediated Signaling	0.969	0.162	SRC,TSC1,PIK3CA,YWHAG,NRAS,GRB2,TUBG1,TUBB2A,EDC3,HRAS,MAPK9,KRAS,GSK3A,MAP3K5,PIK3R4,CBL,PIK3C3,GSK3B
Cardiac Hypertrophy Signaling	0.965	0.149	PIK3CA,EIF2B4,MAP3K11,GNB2L1,RHOT2,SRF,HRAS,KRAS,MAP3K5,PIK3R4,EP300,GNB1,MTOR,RHOT1,PIK3C3,MAP3K7,GSK3B,GNB1L,MYL12A,MAP3K2,RPS6KB1,NRAS,GRB2,ADCY6,PRKAR2A,EIF2B3,MAPK9,MEF2B,CALM1 (includes others),PRKAR2B,EIF2B5,PRKACA
CDK5 Signaling	0.957	0.165	NRAS,PPP2R5B,ITGA6,PRKAR2A,ADCY6,MAPK9,PPP1R14A,HRAS,KRAS,PPP1CC,PRKAR2B,PPP1R12A,CAPN1,PRKACA,PPP2R5E,PPP1CA
Paxillin Signaling	0.957	0.165	SRC,PAK4,PIK3CA,NRAS,GRB2,ARHGEF7,ITGA6,HRAS,ITGA5,MAPK9,KRAS,PIK3R4,ITGB3,ITGAE,PTK2,PIK3C3
Lysine Degradation II	0.955	0.4	AASDHPPT,AASS
2-oxobutanoate Degradation I	0.955	0.4	DLD,MUT
Polyamine Regulation in Colon Cancer	0.949	0.227	PPARG,OAZ2,KRAS,CTNNB1,PSME3
Glioma Invasiveness Signaling	0.947	0.182	PTK2,PIK3CA,NRAS,RHOT1,PIK3C3,RHOT2,HRAS,KRAS,PIK3R4,ITGB3
Regulation of Cellular Mechanics by Calpain Protease	0.947	0.182	PTK2,SRC,NRAS,GRB2,CAPN1,ITGA5,HRAS,KRAS,CAPN7,CAPN10
Valine Degradation I	0.944	0.25	HIBCH,DLD,ACADSB,HADHA
Cell Cycle Regulation by BTG Family Proteins	0.938	0.2	E2F4,CNOT7,PPP2R5B,BTG1,PPP2R5E,E2F3,PRMT1
Acyl Carrier Protein Metabolism	0.924	1	AASDHPPT
S-methyl-5'-thioadenosine Degradation II	0.924	1	MTAP
Acetyl-CoA Biosynthesis III (from Citrate)	0.924	1	ACLY
Threonine Degradation II	0.924	1	GCAT
Asparagine Biosynthesis I	0.924	1	ASNS
Adenine and Adenosine Salvage VI	0.924	1	ADK
UVC-Induced MAPK Signaling	0.921	0.19	BRAF,SRC,NRAS,SMPD4,MAPK9,HRAS,KRAS,ATR
CD40 Signaling	0.907	0.175	TRAF6,TRAF3,PIK3CA,NFKBIA,CD40,PIK3C3,NFKBIE,MAP3K7,MAPK9,IKBKAP,PIK3R4
ERK5 Signaling	0.907	0.175	RPS6KB1,SRC,YWHAG,NRAS,RPS6KB2,HRAS,KRAS,WNK1,MEF2B,MAP3K2,EP300
Ovarian Cancer Signaling	0.907	0.156	RPS6KB1,SRC,PIK3CA,NRAS,PA2G4,TFDP1,PRKAR2A,HRAS,KRAS,PIK3R4,BRAF,VEGFA,MTOR,PRKAR2B,PIK3C3,RPS6KB2,PRKACA,FZD6,GSK3B,CTNNB1
NF-ÎºB Signaling	0.889	0.151	TRAF3,PIK3CA,NFKBIE,TAB2,HRAS,KRAS,PIK3R4,EP300,BRAF,NFKBIA,PIK3C3,MAP3K7,TDP2,GSK3B,NRAS,HDAC2,HDAC1,TBK1,TAB3,TRAF6,CSNK2A2,CD40,PRKACA,BTRC,FGFRL1
Cdc42 Signaling	0.872	0.156	SRC,EXOC1,PAK4,MAP3K11,RALA,DIAPH3,WASL,ITGA5,MAPK9,DIAPH1,EXOC8,ARPC1A,PPP1R12A,BAIAP2,EXOC2,EXOC5,CDC42SE1,GSK3B,MYL12A
Amyloid Processing	0.871	0.18	CSNK2A2,PRKAR2B,CAPN1,PRKAR2A,PRKACA,PSENEN,CAPN7,GSK3B,CAPN10
Molecular Mechanisms of Cancer	0.86	0.139	TAB2,HRAS,KRAS,GSK3A,PIK3R4,PTK2,ZBTB17,MAP3K7,GSK3B,SMAD2,E2F4,SMAD9,TFDP1,TYK2,ITGA5,CBL,FZD6,PRKACA,FYN,RAP2A,PIK3CA,RALA,PA2G4,ARHGEF7,NFKBIE,RHOT2,CTNNA1,PSENEN,MAP3K5,E2F3,CDKN2B,EP300,BRAF,NFKBIA,RHOT1,PIK3C3,BID,CTNNB1,SRC,PAK4,NRAS,GRB2,APAF1,PRKAR2A,ADCY6,MAPK9,PRKAR2B,RBPJ,ATR
Role of JAK2 in Hormone-like Cytokine Signaling	0.856	0.2	TYK2,SOCS4,SOCS7,STAT5B,HLTF,SIRPA
TGF-Î² Signaling	0.855	0.163	SMAD2,NRAS,SMAD9,GRB2,HDAC1,MAPK9,HRAS,KRAS,SMURF1,EP300,TRAF6,PIAS4,RNF111,MAP3K7
Apoptosis Signaling	0.855	0.163	ENDOG,NRAS,NFKBIE,APAF1,HRAS,KRAS,MAP3K5,PARP1,NFKBIA,CAPN1,BID,CAPN7,CAPN10,AIFM1
LPS-stimulated MAPK Signaling	0.842	0.167	PIK3CA,NRAS,NFKBIA,PIK3C3,NFKBIE,SRF,MAP3K7,MAPK9,HRAS,KRAS,MAP3K5,PIK3R4
Telomerase Signaling	0.835	0.16	ETS1,PIK3CA,NRAS,HDAC2,GRB2,PPP2R5B,HDAC1,PDPK1,HRAS,KRAS,PIK3R4,TERF2,HDAC6,PIK3C3,PPP2R5E
PKCÎ¸ Signaling in T Lymphocytes	0.827	0.156	FYN,PIK3CA,MAP3K11,NRAS,GRB2,NFATC3,NFKBIE,HRAS,KRAS,MAP3K5,PIK3R4,NFATC1,POU2F1,NFKBIA,PIK3C3,MAP3K7,MAP3K2
Tumoricidal Function of Hepatic Natural Killer Cells	0.826	0.208	ENDOG,M6PR,APAF1,BID,AIFM1
Tight Junction Signaling	0.815	0.148	YKT6,VTI1A,PPP2R5B,NAPG,PRKAR2A,MPP5,CTNNA1,YBX3,SMURF1,NSF,PRKAR2B,CLDN12,NUDT21,VAMP3,PRKACA,STX16,CPSF3,SAFB,PVRL1,GOSR1,PPP2R5E,GOSR2,CTNNB1,VASP
Histidine Degradation III	0.813	0.333	MTHFD2,MTHFD1
Pentose Phosphate Pathway (Non-oxidative Branch)	0.813	0.333	TALDO1,RPIA
Acetyl-CoA Biosynthesis I (Pyruvate Dehydrogenase Complex)	0.813	0.333	PDHA1,DLD
Glycogen Biosynthesis II (from UDP-D-Glucose)	0.813	0.333	GYS1,UGP2
April Mediated Signaling	0.797	0.184	TRAF6,TRAF3,NFKBIA,NFATC3,NFKBIE,MAPK9,NFATC1
IL-2 Signaling	0.795	0.173	CSNK2A2,PIK3CA,NRAS,GRB2,PIK3C3,HRAS,KRAS,STAT5B,PIK3R4
UVA-Induced MAPK Signaling	0.789	0.16	RPS6KB1,PIK3CA,NRAS,MAPK9,HRAS,KRAS,PIK3R4,PARP1,MTOR,SMPD4,PIK3C3,RPS6KB2,PARP11
BER pathway	0.785	0.25	LIG1,POLG,PARP1
HER-2 Signaling in Breast Cancer	0.78	0.162	TSC1,PIK3CA,NRAS,GRB2,PIK3C3,HRAS,KRAS,GSK3A,MAP3K5,GSK3B,PIK3R4,ITGB3
GNRH Signaling	0.778	0.151	SRC,PAK4,MAP3K11,NRAS,GRB2,PRKAR2A,ADCY6,HRAS,MAPK9,KRAS,MAP3K5,EP300,PTK2,PRKAR2B,ITPR3,PRKACA,MAP3K7,DNM2,MAP3K2
Agrin Interactions at Neuromuscular Junction	0.772	0.164	PTK2,SRC,PAK4,NRAS,ARHGEF7,ITGA6,ITGA5,MAPK9,HRAS,KRAS,ITGB3
Transcriptional Regulatory Network in Embryonic Stem Cells	0.755	0.179	RIF1,REST,CDYL,GATA6,SKIL,SET,SMARCAD1
Acute Myeloid Leukemia Signaling	0.751	0.16	BRAF,RPS6KB1,MTOR,PIK3CA,NRAS,GRB2,PIK3C3,RPS6KB2,HRAS,KRAS,STAT5B,PIK3R4
PPAR Signaling	0.745	0.156	TRAF6,PPARG,NFKBIA,NRAS,MED1,PDGFA,GRB2,NFKBIE,MAP3K7,HRAS,KRAS,STAT5B,SCAND1,EP300
fMLP Signaling in Neutrophils	0.743	0.152	PIK3CA,NRAS,NFATC3,NFKBIE,GNB2L1,HRAS,KRAS,PIK3R4,NFATC1,GNB1,CALM1 (includes others),ARPC1A,NFKBIA,PIK3C3,ITPR3,GNB1L
Pancreatic Adenocarcinoma Signaling	0.743	0.152	SMAD2,PIK3CA,E2F4,RALA,PA2G4,TFDP1,GRB2,TYK2,MAPK9,KRAS,PIK3R4,E2F3,BIRC5,CDKN2B,VEGFA,PIK3C3
Î±-Adrenergic Signaling	0.734	0.157	GNB1,CALM1 (includes others),PRKAR2B,GYS1,NRAS,ITPR3,GNB2L1,PRKACA,ADCY6,PRKAR2A,HRAS,KRAS,GNB1L
ErbB Signaling	0.734	0.157	RPS6KB1,MTOR,PIK3CA,PAK4,NRAS,GRB2,PIK3C3,HRAS,PDPK1,MAPK9,KRAS,GSK3B,PIK3R4
GM-CSF Signaling	0.733	0.164	ETS1,PIK3CA,NRAS,GRB2,PIK3C3,GNB2L1,HRAS,KRAS,STAT5B,PIK3R4
CREB Signaling in Neurons	0.724	0.145	POLR2F,PIK3CA,NRAS,POLR2D,GRB2,GNB2L1,TBP,ADCY6,PRKAR2A,POLR2J,HRAS,KRAS,POLR2B,PIK3R4,EP300,GNB1,CALM1 (includes others),POLR2A,PRKAR2B,PIK3C3,ITPR3,PRKACA,GNB1L
Regulation of IL-2 Expression in Activated and Anergic T Lymphocytes	0.723	0.158	SMAD2,FYN,CALM1 (includes others),NRAS,NFKBIA,GRB2,NFATC3,NFKBIE,MAPK9,HRAS,KRAS,NFATC1
Antiproliferative Role of TOB in T Cell Signaling	0.719	0.192	PABPC1,SMAD2,PABPC4,CUL1,CDC34
IL-1 Signaling	0.719	0.154	ECSIT,NFKBIE,GNB2L1,TAB2,PRKAR2A,ADCY6,MAPK9,TRAF6,GNB1,PRKAR2B,NFKBIA,PRKACA,MAP3K7,GNB1L
T Cell Receptor Signaling	0.719	0.154	FYN,PIK3CA,NRAS,GRB2,NFATC3,HRAS,KRAS,PIK3R4,NFATC1,SHB,CALM1 (includes others),CBL,NFKBIA,PIK3C3
Oncostatin M Signaling	0.714	0.182	NRAS,GRB2,TYK2,HRAS,KRAS,STAT5B
Role of NFAT in Regulation of the Immune Response	0.706	0.144	FYN,PIK3CA,NRAS,CSNK1G1,GRB2,NFATC3,NFKBIE,CSNK1G3,GNB2L1,HRAS,GSK3A,KRAS,PIK3R4,NFATC1,MEF2B,GNB1,CALM1 (includes others),NFKBIA,PIK3C3,ITPR3,IKBKAP,GSK3B,GNB1L
IL-17A Signaling in Airway Cells	0.702	0.161	TRAF6,PIK3CA,NFKBIA,PIK3C3,NFKBIE,TYK2,MAP3K7,MAPK9,GSK3B,PIK3R4
Aspartate Degradation II	0.701	0.286	MDH2,GOT2
Sertoli Cell-Sertoli Cell Junction Signaling	0.7	0.143	SRC,MAP3K11,NRAS,TUBG1,TUBB2A,CTNNA1,PRKAR2A,HRAS,YBX3,ITGA5,MAPK9,KRAS,GSK3A,MAP3K5,PRKAR2B,TJAP1,CLDN12,PRKACA,MAP3K7,MTMR2,PVRL1,GSK3B,CTNNB1,MAP3K2
Mouse Embryonic Stem Cell Pluripotency	0.694	0.152	PIK3CA,NRAS,SMAD9,GRB2,TYK2,HRAS,KRAS,PIK3R4,LIFR,PIK3C3,FZD6,MAP3K7,GSK3B,CTNNB1
PPARÎ±/RXRÎ± Activation	0.687	0.143	SMAD2,MED23,NRAS,GRB2,MED1,NFKBIE,ADCY6,PRKAR2A,CKAP5,HRAS,KRAS,TGS1,NCOA3,EP300,TRAF6,CAND1,PRKAR2B,NFKBIA,CLOCK,PRKACA,MAP3K7,STAT5B,GOT2
Neuregulin Signaling	0.682	0.153	SRC,RPS6KB1,MTOR,NRAS,GRB2,CRKL,RPS6KB2,DLG4,HRAS,PDPK1,ITGA5,KRAS,STAT5B
Melanoma Signaling	0.677	0.171	BRAF,PIK3CA,NRAS,PIK3C3,HRAS,KRAS,PIK3R4
Glioblastoma Multiforme Signaling	0.666	0.144	TSC1,RPS6KB1,SRC,PIK3CA,E2F4,NRAS,GRB2,PDGFA,RHOT2,HRAS,KRAS,E2F3,PIK3R4,MTOR,RHOT1,PIK3C3,ITPR3,FZD6,GSK3B,CTNNB1
ErbB4 Signaling	0.661	0.161	PIK3CA,NRAS,GRB2,PIK3C3,PDPK1,HRAS,PSENEN,KRAS,PIK3R4
Cell Cycle: G2/M DNA Damage Checkpoint Regulation	0.651	0.163	YWHAG,CUL1,TRIP12,TOP2A,BTRC,ATR,PPM1D,EP300
Epoxysqualene Biosynthesis	0.65	0.5	SQLE
All-trans-decaprenyl Diphosphate Biosynthesis	0.65	0.5	PDSS2
Flavin Biosynthesis IV (Mammalian)	0.65	0.5	FLAD1
Sulfate Activation for Sulfonation	0.65	0.5	PAPSS1
Thiosulfate Disproportionation III (Rhodanese)	0.65	0.5	TST
L-glutamine Biosynthesis II (tRNA-dependent)	0.65	0.5	QRSL1
ILK Signaling	0.645	0.14	FLNB,PIK3CA,PPP2R5B,RHOT2,PDPK1,GSK3A,PIK3R4,EP300,ITGB3,VEGFA,PTK2,MTOR,PPP1R12A,RHOT1,PIK3C3,ILKAP,GSK3B,CTNNB1,DSP,TESK1,NACA,SNAI1,MAPK9,KRT18,PPP2R5E
Telomere Extension by Telomerase	0.642	0.214	TERF2,HNRNPA2B1,XRCC5
Dermatan Sulfate Degradation (Metazoa)	0.642	0.214	HYAL3,HYAL2,FGFRL1
G Beta Gamma Signaling	0.633	0.149	GNB1,SRC,PRKAR2B,NRAS,GRB2,GNB2L1,PRKACA,PRKAR2A,HRAS,PDPK1,KRAS,GNB1L,DNM2
BMP signaling pathway	0.63	0.153	NRAS,PRKAR2B,SMAD9,GRB2,PRKAR2A,PRKACA,MAP3K7,MAPK9,HRAS,KRAS,SMURF1
Fatty Acid Î²-oxidation I	0.628	0.179	HSD17B10,HSD17B4,SLC27A4,HADHA,HADH
Cardiac Î²-adrenergic Signaling	0.619	0.143	AKAP8,PDE12,PPP2R5B,AKAP9,GNB2L1,PRKAR2A,ADCY6,PPP1R14A,GNB1,PPP1CC,PRKAR2B,PPP1R12A,PRKACA,AKAP10,TDP2,PPP2R5E,PPP1CA,GNB1L
Nur77 Signaling in T Lymphocytes	0.619	0.16	CALM1 (includes others),HDAC2,SIN3B,HDAC1,APAF1,NFATC1,MAP3K2,EP300
Neurotrophin/TRK Signaling	0.616	0.154	PIK3CA,NRAS,GRB2,PIK3C3,PDPK1,HRAS,KRAS,MAP3K5,PIK3R4,EP300
p53 Signaling	0.602	0.146	PIK3CA,MED1,HDAC1,APAF1,C12orf5,PIK3R4,BIRC5,EP300,TP53I3,PIK3C3,CCNK,ATR,GSK3B,CTNNB1
Thrombin Signaling	0.597	0.137	SRC,RPS6KB1,PIK3CA,NRAS,CAMK1,CAMK1D,GRB2,GNB2L1,RHOT2,TBP,ADCY6,PDPK1,HRAS,KRAS,PIK3R4,GATA2,PTK2,GNB1,PPP1R12A,RHOT1,PIK3C3,ITPR3,GATA6,GNB1L,MYL12A
Role of RIG1-like Receptors in Antiviral Innate Immunity	0.596	0.167	TRAF6,TRAF3,NFKBIA,NFKBIE,TBK1,EP300
CTLA4 Signaling in Cytotoxic T Lymphocytes	0.595	0.148	FYN,PIK3CA,GRB2,PIK3C3,AP2B1,CLTB,CLTC,PPP2R5B,AP1B1,PPP2R5E,PIK3R4,AP1G1
GÎ±12/13 Signaling	0.59	0.143	SRC,PIK3CA,NRAS,CDH4,NFKBIE,MAPK9,HRAS,KRAS,MAP3K5,PIK3R4,MEF2B,PTK2,NFKBIA,PIK3C3,CTNNB1,MYL12A
Growth Hormone Signaling	0.59	0.152	RPS6KB1,PIK3CA,PIK3C3,SRF,RPS6KB2,PDPK1,SOCS4,SOCS7,STAT5B,PIK3R4
Sonic Hedgehog Signaling	0.587	0.172	PRKAR2B,GLIS2,PRKAR2A,PRKACA,GSK3B
Clathrin-mediated Endocytosis Signaling	0.583	0.137	SRC,PIK3CA,GRB2,PDGFA,AP2B1,WASL,CLTC,USP9X,CLTB,GAK,RAB7A,ITGA5,AP1B1,HIP1,PIK3R4,ITGB3,MET,VEGFA,CSNK2A2,ARPC1A,CBL,PIK3C3,CLU,DNM2
Renin-Angiotensin Signaling	0.575	0.143	PAK4,PIK3CA,NRAS,GRB2,PRKAR2A,ADCY6,MAPK9,HRAS,KRAS,PIK3R4,PTK2,PRKAR2B,PIK3C3,ITPR3,PRKACA
Role of Tissue Factor in Cancer	0.575	0.143	FYN,RPS6KB1,SRC,PIK3CA,NRAS,ITGA6,HRAS,KRAS,PIK3R4,ITGB3,VEGFA,YES1,MTOR,PIK3C3,STAT5B
Netrin Signaling	0.561	0.162	PRKAR2B,NFATC3,PRKAR2A,PRKACA,NFATC1,ENAH
Role of NANOG in Mammalian Embryonic Stem Cell Pluripotency	0.556	0.142	PIK3CA,NRAS,SMAD9,GRB2,TYK2,HRAS,KRAS,PIK3R4,LIFR,RIF1,PIK3C3,FZD6,GATA6,GSK3B,CTNNB1
Role of BRCA1 in DNA Damage Response	0.549	0.15	E2F4,POU2F1,RFC1,ATR,RPA1,UIMC1,E2F3,HLTF,SMARCA4
Gap Junction Signaling	0.542	0.137	SRC,PIK3CA,NRAS,CSNK1G1,GRB2,CSNK1G3,TUBG1,TUBB2A,PRKAR2A,ADCY6,HRAS,KRAS,PIK3R4,PRKAR2B,SP3,PIK3C3,ITPR3,PRKACA,CTNNB1,MAP3K2
Glycolysis I	0.537	0.174	ENO1,GPI,TPI1,PFKM
Glycogen Degradation II	0.535	0.222	PGM3,AGL
Folate Transformations I	0.535	0.222	MTHFD2,MTHFD1
PI3K Signaling in B Lymphocytes	0.534	0.139	FYN,PIK3CA,NRAS,ATF5,NFATC3,NFKBIE,PDPK1,HRAS,KRAS,NFATC1,CALM1 (includes others),CBL,NFKBIA,CD40,ITPR3,PLEKHA1
IL-6 Signaling	0.534	0.139	HSPB3,PIK3CA,NRAS,GRB2,NFKBIE,SRF,MAPK9,HRAS,KRAS,PIK3R4,VEGFA,TRAF6,CSNK2A2,NFKBIA,PIK3C3,MAP3K7
Thrombopoietin Signaling	0.532	0.151	PIK3CA,NRAS,GRB2,PIK3C3,HRAS,KRAS,STAT5B,PIK3R4
Neuroprotective Role of THOP1 in Alzheimer's Disease	0.529	0.158	PRKAR2B,NFYA,PRKAR2A,PRKACA,SST,THOP1
PEDF Signaling	0.517	0.145	PPARG,PIK3CA,NRAS,NFKBIA,PIK3C3,NFKBIE,SRF,HRAS,KRAS,PIK3R4
PTEN Signaling	0.516	0.138	RPS6KB1,PIK3CA,NRAS,GRB2,HRAS,ITGA5,PDPK1,GSK3A,KRAS,PTK2,CSNK2A2,CBL,MAGI1,RPS6KB2,FGFRL1,GSK3B
4-1BB Signaling in T Lymphocytes	0.512	0.161	NFKBIA,NFKBIE,MAPK9,IKBKAP,MAP3K5
Triacylglycerol Biosynthesis	0.512	0.161	LCLAT1,PPP2R2D,LPCAT4,DGAT1,ELOVL6
Dopamine Receptor Signaling	0.512	0.143	PPP1CC,PRKAR2B,PPP1R12A,PPP2R5B,NCS1,PRKAR2A,ADCY6,PRKACA,PPP1R14A,PPP2R5E,PPP1CA
Activation of IRF by Cytosolic Pattern Recognition Receptors	0.506	0.148	TRAF6,TRAF3,NFKBIA,CD40,NFKBIE,MAPK9,IKBKAP,TBK1
Role of PI3K/AKT Signaling in the Pathogenesis of Influenza	0.506	0.148	KPNA3,PIK3CA,NFKBIA,CRKL,PIK3C3,NFKBIE,GSK3B,PIK3R4
Type II Diabetes Mellitus Signaling	0.5	0.138	PPARG,PIK3CA,NFKBIE,MAPK9,PDPK1,SOCS4,MAP3K5,PIK3R4,SLC27A4,MTOR,NFKBIA,SMPD4,PIK3C3,MAP3K7,SOCS7
Diphthamide Biosynthesis	0.5	0.333	EEF2
5-aminoimidazole Ribonucleotide Biosynthesis I	0.5	0.333	GART
Coenzyme A Biosynthesis	0.5	0.333	COASY
Glutathione Biosynthesis	0.5	0.333	GCLC
Glutathione Redox Reactions II	0.5	0.333	GSR
Hypusine Biosynthesis	0.5	0.333	DHPS
Spermidine Biosynthesis I	0.5	0.333	SRM
Oxidized GTP and dGTP Detoxification	0.5	0.333	RUVBL2
Glutamate Degradation II	0.5	0.333	GOT2
N-acetylglucosamine Degradation I	0.5	0.333	GNPDA2
Aspartate Biosynthesis	0.5	0.333	GOT2
Thyroid Cancer Signaling	0.498	0.154	PPARG,BRAF,NRAS,HRAS,KRAS,CTNNB1
Gluconeogenesis I	0.496	0.167	ENO1,GPI,ME1,MDH2
Rac Signaling	0.484	0.137	PTK2,RPS6KB1,PIK3CA,PAK4,ARPC1A,NRAS,MAP3K11,PIK3C3,BAIAP2,HRAS,ITGA5,KRAS,PIK3R4,NCKAP1
Role of CHK Proteins in Cell Cycle Checkpoint Control	0.481	0.145	E2F4,HUS1,PPP2R5B,RFC1,ATR,RPA1,PPP2R5E,E2F3
IL-17 Signaling	0.473	0.141	TRAF6,PIK3CA,NRAS,PIK3C3,MAP3K7,MAPK9,HRAS,KRAS,GSK3B,PIK3R4
STAT3 Pathway	0.473	0.141	SRC,NRAS,MAP3K11,TYK2,MAPK9,HRAS,KRAS,SOCS4,FGFRL1,SOCS7
Pentose Phosphate Pathway	0.471	0.2	TALDO1,RPIA
IL-15 Signaling	0.454	0.141	PTK2,PIK3CA,NRAS,PIK3C3,TYK2,HRAS,KRAS,STAT5B,PIK3R4
TWEAK Signaling	0.448	0.152	TRAF3,NFKBIA,NFKBIE,APAF1,BID
p70S6K Signaling	0.433	0.133	RPS6KB1,SRC,PIK3CA,YWHAG,NRAS,EEF2,GRB2,PPP2R5B,PDPK1,HRAS,KRAS,PIK3R4,MTOR,PIK3C3,PPP2R5E
P2Y Purigenic Receptor Signaling Pathway	0.433	0.133	PIK3CA,NRAS,GNB2L1,PRKAR2A,ADCY6,HRAS,KRAS,PIK3R4,EP300,ITGB3,GNB1,PRKAR2B,PIK3C3,PRKACA,GNB1L
Adipogenesis pathway	0.419	0.131	PPARG,ATG5,RPS6KB1,CCNH,HDAC2,SMAD9,SIN3B,HDAC1,SENP2,HDAC6,PAXIP1,ERCC3,CLOCK,FZD6,FGFRL1,STAT5B
Glycogen Degradation III	0.416	0.182	PGM3,AGL
Role of JAK1 and JAK3 in Î³c Cytokine Signaling	0.413	0.138	PIK3CA,NRAS,GRB2,PIK3C3,HRAS,KRAS,STAT5B,PIK3R4
GDNF Family Ligand-Receptor Interactions	0.412	0.136	PIK3CA,NRAS,GRB2,PIK3C3,ITPR3,MAPK9,HRAS,KRAS,PIK3R4
Chemokine Signaling	0.412	0.136	PTK2,CALM1 (includes others),SRC,NRAS,CAMK1,CAMK1D,PPP1R12A,HRAS,KRAS
Arsenate Detoxification I (Glutaredoxin)	0.4	0.25	GLRX2
Branched-chain Î±-keto acid Dehydrogenase Complex	0.4	0.25	DLD
Methylmalonyl Pathway	0.4	0.25	MUT
Glycine Cleavage Complex	0.4	0.25	DLD
Myo-inositol Biosynthesis	0.4	0.25	IMPAD1
L-cysteine Degradation I	0.4	0.25	GOT2
iCOS-iCOSL Signaling in T Helper Cells	0.399	0.131	CALM1 (includes others),PIK3CA,NFKBIA,CD40,NFATC3,GRB2,PIK3C3,NFKBIE,ITPR3,PDPK1,PLEKHA1,PIK3R4,NFATC1
CXCR4 Signaling	0.397	0.128	SRC,PAK4,PIK3CA,NRAS,RHOT2,GNB2L1,ADCY6,HRAS,MAPK9,KRAS,PIK3R4,PTK2,GNB1,RHOT1,PIK3C3,ITPR3,GNB1L,ELMO2,MYL12A
Induction of Apoptosis by HIV1	0.392	0.136	NFKBIA,NFKBIE,APAF1,SLC25A3,MAPK9,BID,IKBKAP,MAP3K5
IL-17A Signaling in Fibroblasts	0.391	0.143	TRAF6,NFKBIA,NFKBIE,MAP3K7,GSK3B
Semaphorin Signaling in Neurons	0.391	0.137	PTK2,MET,FYN,SEMA3A,PAK4,RHOT1,RHOT2
CD28 Signaling in T Helper Cells	0.386	0.13	FYN,PIK3CA,GRB2,NFATC3,NFKBIE,MAPK9,PDPK1,PIK3R4,NFATC1,CALM1 (includes others),NFKBIA,ARPC1A,PIK3C3,ITPR3
Cholecystokinin/Gastrin-mediated Signaling	0.384	0.13	SRC,NRAS,GRB2,RHOT2,SRF,MAPK9,HRAS,KRAS,MEF2B,PTK2,RHOT1,ITPR3,SST
Unfolded protein response	0.37	0.135	PPARG,SEL1L,HSPA4,SYVN1,INSIG1,PPP1R15A,MAP3K5
Ubiquinol-10 Biosynthesis (Eukaryotic)	0.369	0.167	COQ3,MICAL3
nNOS Signaling in Neurons	0.368	0.136	CALM1 (includes others),CAPN1,DLG4,CAPN7,CAPN10,PFKM
Relaxin Signaling	0.351	0.126	PIK3CA,PDE12,NFKBIE,GNB2L1,PRKAR2A,ADCY6,PIK3R4,BRAF,VEGFA,GNB1,NFKBIA,PRKAR2B,PIK3C3,PRKACA,TDP2,GNB1L
Role of Oct4 in Mammalian Embryonic Stem Cell Pluripotency	0.346	0.133	AQR,REST,PPP1R8,IGF2BP1,ASH2L,PARP1
Notch Signaling	0.342	0.135	FURIN,MAML3,PSENEN,RBPJ,JAG1
IL-3 Signaling	0.339	0.129	PIK3CA,NRAS,GRB2,CRKL,PIK3C3,HRAS,KRAS,STAT5B,PIK3R4
Colorectal Cancer Metastasis Signaling	0.335	0.123	PIK3CA,RHOT2,GNB2L1,HRAS,KRAS,PIK3R4,GNB1,VEGFA,BRAF,APPL1,RHOT1,PIK3C3,GSK3B,CTNNB1,GNB1L,SRC,SMAD2,E2F4,NRAS,GRB2,TYK2,PRKAR2A,ADCY6,MAPK9,BIRC5,PRKAR2B,PRKACA,FZD6
Protein Kinase A Signaling	0.335	0.122	FLNB,AKAP8,NFATC3,PDE12,NFKBIE,GNB2L1,AKAP9,CDC23,GSK3A,NFATC1,EP300,BRAF,PTK2,GNB1,PPP1CC,NFKBIA,GYS1,PPP1R12A,TDP2,GSK3B,CTNNB1,DUSP12,PPP1CA,GNB1L,VASP,MYL12A,YWHAG,ADCY6,PRKAR2A,PPP1R14A,ANAPC7,PTP4A1,ANAPC4,CALM1 (includes others),PRKAR2B,EYA3,ITPR3,AKAP10,PRKACA,DUSP4,CDC27,SIRPA,DUSP16
Pyruvate Fermentation to Lactate	0.328	0.2	LDHB
Ceramide Biosynthesis	0.328	0.2	SPTLC2
UDP-N-acetyl-D-glucosamine Biosynthesis II	0.328	0.2	PGM3
Lysine Degradation V	0.328	0.2	AASDHPPT
Citrulline-Nitric Oxide Cycle	0.328	0.2	ASL
Galactose Degradation I (Leloir Pathway)	0.328	0.2	GALK2
Folate Polyglutamylation	0.328	0.2	MTHFD1
Chondroitin Sulfate Degradation (Metazoa)	0.328	0.154	HYAL3,HYAL2
Cholesterol Biosynthesis I	0.328	0.154	SQLE,LBR
Cholesterol Biosynthesis II (via 24,25-dihydrolanosterol)	0.328	0.154	SQLE,LBR
Cholesterol Biosynthesis III (via Desmosterol)	0.328	0.154	SQLE,LBR
HIF1Î± Signaling	0.322	0.125	VEGFA,PIK3CA,NRAS,COPS5,PIK3C3,MAPK9,HRAS,KRAS,NAA10,PIK3R4,LDHB,EP300
Ephrin B Signaling	0.307	0.125	PTK2,GNB1,RGS3,CBL,GNB2L1,HRAS,GNB1L,CTNNB1,HNRNPK
FGF Signaling	0.298	0.123	MET,PIK3CA,GRB2,CRKL,PIK3C3,HRAS,FGFRL1,MAP3K5,PIK3R4,EP300
Aldosterone Signaling in Epithelial Cells	0.296	0.121	HSPB3,PIK3CA,DNAJC27,PDPK1,KRAS,DNAJC2,PIK3R4,HSPA12A,DNAJC11,HSPA4,DNAJC5,PIK3C3,ITPR3,HSPB11,DNAJB6,DNAJB5,DNAJC7
nNOS Signaling in Skeletal Muscle Cells	0.292	0.143	CALM1 (includes others),DMD
Vitamin-C Transport	0.292	0.143	SLC23A2,TXN
Synaptic Long Term Potentiation	0.289	0.121	CALM1 (includes others),PPP1CC,PRKAR2B,NRAS,PPP1R12A,ITPR3,PRKACA,PRKAR2A,HRAS,PPP1R14A,KRAS,PPP1CA,EP300
Production of Nitric Oxide and Reactive Oxygen Species in Macrophages	0.283	0.12	PIK3CA,MAP3K11,NFKBIE,PPP2R5B,RHOT2,TYK2,MAPK9,PPP1R14A,MAP3K5,PIK3R4,PPP1CC,NFKBIA,PPP1R12A,RHOT1,PIK3C3,MAP3K7,PPP2R5E,PPP1CA,CLU,SIRPA,MAP3K2
Phospholipase C Signaling	0.28	0.119	FYN,RALA,NFATC3,ARHGEF7,RHOT2,GNB2L1,HRAS,KRAS,NFATC1,EP300,GNB1,HDAC6,PPP1R12A,RHOT1,GNB1L,MYL12A,SRC,NRAS,HDAC2,GRB2,HDAC1,ADCY6,ITGA5,PPP1R14A,MEF2B,CALM1 (includes others),ITPR3
Mechanisms of Viral Exit from Host Cells	0.279	0.125	SNF8,CHMP4B,LMNB2,VPS37C,VPS4A
Arginine Biosynthesis IV	0.273	0.167	ASL
Urea Cycle	0.273	0.167	ASL
Chondroitin and Dermatan Biosynthesis	0.273	0.167	CHSY1
Thioredoxin Pathway	0.273	0.167	TXN
Superoxide Radicals Degradation	0.273	0.167	SOD1
Zymosterol Biosynthesis	0.273	0.167	LBR
Glycoaminoglycan-protein Linkage Region Biosynthesis	0.273	0.167	B3GAT3
Pregnenolone Biosynthesis	0.273	0.167	MICAL3
GDP-glucose Biosynthesis	0.273	0.167	PGM3
Granzyme A Signaling	0.261	0.133	SET,EP300
Glutathione Redox Reactions I	0.261	0.133	GSR,MGST3
CDP-diacylglycerol Biosynthesis I	0.261	0.133	LCLAT1,LPCAT4
IL-22 Signaling	0.254	0.125	TYK2,MAPK9,STAT5B
Estrogen-mediated S-phase Entry	0.254	0.125	E2F4,TFDP1,E2F3
IL-9 Signaling	0.248	0.121	PIK3CA,PIK3C3,STAT5B,PIK3R4
Mismatch Repair in Eukaryotes	0.233	0.125	RFC1,RPA1
IL-15 Production	0.232	0.12	PTK2,MAP3K11,TYK2
Role of JAK family kinases in IL-6-type Cytokine Signaling	0.232	0.12	TYK2,MAPK9,STAT5B
Glucose and Glucose-1-phosphate Degradation	0.23	0.143	PGM3
Phosphatidylcholine Biosynthesis I	0.23	0.143	PCYT1A
Ketolysis	0.23	0.143	HADHA
Sphingomyelin Metabolism	0.23	0.143	SMPD4
Sucrose Degradation V (Mammalian)	0.195	0.125	TPI1
Histidine Degradation VI	0.195	0.125	MICAL3

## Sheet: cluster_3
Ingenuity Canonical Pathways	-log(p-value)	Ratio	Molecules
Hepatic Fibrosis / Hepatic Stellate Cell Activation	7.84	0.127	TGFBR1,CTGF,COL4A1,FN1,COL6A2,FGF2,FGFR1,IFNGR2,VEGFC,IL1R1,COL4A2,FGF1,MYL9,TLR4,LY96,COL5A3,COL6A1,CSF1,IGF1R,EDNRA,IL1B,PDGFD,A2M,TIMP2
Epithelial Adherens Junction Signaling	4.75	0.113	ACTR2,AKT2,TGFBR1,LMO7,ACTB,FGFR1,BMPR2,RAP1A,FGF1,MYL9,CDH2,NOTCH2,RRAS2,ACTR3,ZYX,VCL
Integrin Signaling	4.22	0.0942	MYL9,ITGB1,TSPAN3,ACTR2,ARF6,AKT2,RRAS2,ACTR3,TSPAN5,LIMS1,ACTB,ITGA8,ITGAV,ZYX,ITGA1,VCL,RAP1A,ITGA4
Bladder Cancer Signaling	4.08	0.133	CDKN2A,RRAS2,FGF2,MMP14,CDKN1A,VEGFC,MDM2,CCND1,FGF1,MMP19,FGF5
Role of Macrophages, Fibroblasts and Endothelial Cells in Rheumatoid Arthritis	3.82	0.0786	IL6ST,AKT2,FN1,FGF2,IL32,VEGFC,IL17RC,IL1R1,CEBPB,CREB5,CCND1,ROCK2,TLR4,TRAF3IP2,RRAS2,CAMK2D,CSF1,IL1B,SFRP1,PDGFD,WNT5B,RYK
Role of Tissue Factor in Cancer	3.77	0.114	ITGB1,F10,AKT2,CTGF,RRAS2,PTPN11,CSF1,ITGAV,VEGFC,IL1B,CYR61,FGF5
Glioma Signaling	3.68	0.12	CDKN2A,AKT2,RBL2,RRAS2,CAMK2D,CDKN1A,IGF1R,CDKN2C,MDM2,PDGFD,CCND1
Acute Phase Response Signaling	3.62	0.0943	C1R,IL6ST,AKT2,SERPING1,RRAS2,SOD2,FN1,PTPN11,C1S,SERPINF1,IL1B,OSMR,CEBPB,IL1R1,A2M
Regulation of the Epithelial-Mesenchymal Transition Pathway	3.6	0.0904	ID2,AKT2,TGFBR1,FGF2,FGFR1,ZEB1,FGF1,CDH2,NOTCH2,RRAS2,ARAF,PTPN11,PDGFD,JAK3,WNT5B,FGF5
Ephrin Receptor Signaling	3.33	0.0888	ITGB1,ACTR2,AKT2,VEGFC,CREB5,RAP1A,FGF1,ROCK2,ACTR3,RRAS2,SDCBP,PTPN11,PDGFD,GNG5,ITGA4
HGF Signaling	3.28	0.108	ITGB1,CDKN2A,AKT2,RRAS2,PTPN11,MAP3K6,CDKN1A,CCND1,RAP1A,ELK3,ITGA4
Oncostatin M Signaling	3.2	0.182	MT2A,IL6ST,TIMP3,RRAS2,OSMR,JAK3
Superoxide Radicals Degradation	3.18	0.5	SOD2,NQO1,SOD3
Mouse Embryonic Stem Cell Pluripotency	3.06	0.109	IL6ST,ID1,AKT2,ID2,RRAS2,PTPN11,BMPR2,JAK3,ID3,XIAP
Leukocyte Extravasation Signaling	2.97	0.082	ITGB1,TIMP3,ACTB,MMP14,JAM2,THY1,RAP1A,ROCK2,PTPN11,CD44,ITGA1,VCL,MMP19,ITGA4,TIMP2
IGF-1 Signaling	2.95	0.105	IGFBP6,AKT2,NEDD4,CTGF,RRAS2,NOV,PTPN11,IGF1R,IRS2,CYR61
Inhibition of Matrix Metalloproteases	2.92	0.162	TIMP3,ADAM12,MMP14,A2M,TIMP2,MMP19
JAK/Stat Signaling	2.69	0.114	STAT6,AKT2,RRAS2,PTPN11,CDKN1A,STAT2,CEBPB,JAK3
Melanoma Signaling	2.68	0.146	CDKN2A,AKT2,RRAS2,CDKN1A,MDM2,CCND1
Chronic Myeloid Leukemia Signaling	2.52	0.0989	CDKN2A,AKT2,RBL2,RRAS2,TGFBR1,PTPN11,CDKN1A,MDM2,CCND1
Actin Cytoskeleton Signaling	2.49	0.0732	ITGB1,ACTR2,FN1,FGF2,ACTB,FGF1,ROCK2,MYL9,ACTR3,RRAS2,VCL,PDGFD,ARHGAP24,ITGA4,FGF5
Paxillin Signaling	2.34	0.0928	ITGB1,ARF6,RRAS2,ACTB,ITGA8,ITGAV,ITGA1,VCL,ITGA4
PTEN Signaling	2.31	0.0862	ITGB1,AKT2,RRAS2,TGFBR1,FGFR1,CDKN1A,IGF1R,BMPR2,CCND1,ITGA4
Clathrin-mediated Endocytosis Signaling	2.28	0.0743	ITGB1,ACTR2,FGF2,ACTB,VEGFC,MDM2,PCYOX1,FGF1,ARF6,ACTR3,PDGFD,FGF5,APOD
PI3K/AKT Signaling	2.23	0.084	ITGB1,AKT2,RRAS2,LIMS1,PPP2R3A,CDKN1A,MDM2,JAK3,CCND1,ITGA4
Molecular Mechanisms of Cancer	2.19	0.0597	ITGB1,CDKN2A,AKT2,TGFBR1,SMAD6,BMPR2,CDKN2C,MDM2,RAP1A,CCND1,RALBP1,XIAP,NBN,RRAS2,CAMK2D,PTPN11,CDKN1A,CFLAR,JAK3,WNT5B,ITGA4
PEDF Signaling	2.13	0.101	ROCK2,AKT2,SOD2,RRAS2,SERPINF1,ZEB1,CFLAR
Wnt/Î²-catenin Signaling	2.12	0.0736	CDKN2A,CDH2,AKT2,TGFBR1,PPARD,PPP2R3A,CD44,BMPR2,MDM2,SFRP1,CCND1,WNT5B
Pancreatic Adenocarcinoma Signaling	2.11	0.0857	CDKN2A,AKT2,TGFBR1,CDKN1A,VEGFC,MDM2,JAK3,CCND1,RALBP1
FLT3 Signaling in Hematopoietic Progenitor Cells	2.1	0.1	STAT6,AKT2,RRAS2,PTPN11,FLT3LG,STAT2,CREB5
Human Embryonic Stem Cell Pluripotency	2.04	0.0787	S1PR3,AKT2,TGFBR1,FGF2,FGFR1,SMAD6,BMPR2,PDGFD,INHBA,WNT5B
RhoGDI Signaling	2.04	0.0719	ROCK2,ITGB1,MYL9,ACTR2,CDH2,ACTR3,ACTB,CD44,GNG5,CDH13,ARHGDIB,ITGA4
Actin Nucleation by ARP-WASP Complex	2	0.107	ROCK2,ITGB1,ACTR2,ACTR3,RRAS2,ITGA4
Aryl Hydrocarbon Receptor Signaling	1.89	0.0746	CDKN2A,RBL2,GSTA4,NQO1,CDKN1A,IL1B,MDM2,CCND1,ALDH7A1,HSPB1
LPS/IL-1 Mediated Inhibition of RXR Function	1.87	0.066	TLR4,LY96,GSTA4,ACSL5,CHST3,IL1B,FABP3,SLC27A3,IL1R1,CES2,ABCC3,SOD3,ALDH7A1
IL-6 Signaling	1.87	0.0783	IL6ST,AKT2,RRAS2,PTPN11,IL1B,IL1R1,CEBPB,A2M,HSPB1
HIF1Î± Signaling	1.86	0.0833	AKT2,RRAS2,SLC2A1,MMP14,VEGFC,MDM2,VHL,MMP19
Pregnenolone Biosynthesis	1.83	0.333	CYP7B1,MICAL2
ILK Signaling	1.81	0.067	ITGB1,MYL9,AKT2,FN1,LIMS1,PPP2R3A,ACTB,MUC1,VEGFC,IRS2,CREB5,CCND1
FGF Signaling	1.77	0.0864	AKT2,PTPN11,FGF2,FGFR1,CREB5,FGF1,FGF5
Cell Cycle: G1/S Checkpoint Regulation	1.77	0.0952	CDKN2A,RBL2,CDKN1A,CDKN2C,MDM2,CCND1
TR/RXR Activation	1.74	0.0854	KLF9,F10,AKT2,SLC2A1,SLC16A2,MDM2,RCAN2
Remodeling of Epithelial Adherens Junctions	1.71	0.0923	ACTR2,ARF6,ACTR3,ACTB,ZYX,VCL
Coagulation System	1.7	0.125	F10,TFPI,A2M,BDKRB1
NF-ÎºB Signaling	1.67	0.0663	TLR4,AKT2,RRAS2,TGFBR1,ARAF,FGFR1,RELB,IGF1R,BMPR2,IL1B,IL1R1
Agrin Interactions at Neuromuscular Junction	1.65	0.0896	ITGB1,RRAS2,ACTB,ITGA1,AGRN,ITGA4
Renal Cell Carcinoma Signaling	1.65	0.0896	AKT2,RRAS2,SLC2A1,PTPN11,RAP1A,VHL
VEGF Signaling	1.61	0.0805	ROCK2,AKT2,RRAS2,PTPN11,ACTB,VEGFC,VCL
Ovarian Cancer Signaling	1.6	0.0703	CDKN2A,AKT2,RRAS2,PTGS1,CD44,VEGFC,EDNRA,CCND1,WNT5B
Histidine Degradation VI	1.58	0.25	CYP7B1,MICAL2
Caveolar-mediated Endocytosis Signaling	1.56	0.0857	ITGB1,ACTB,ITGA8,ITGAV,ITGA1,ITGA4
Axonal Guidance Signaling	1.56	0.0517	ITGB1,ACTR2,AKT2,PLXNA3,VEGFC,SLIT2,RAP1A,ADAMTS2,MYL9,ROCK2,ACTR3,SDCBP,RRAS2,ADAM12,SEMA3D,PTPN11,SEMA3C,PDGFD,GNG5,WNT5B,ITGA4
Death Receptor Signaling	1.54	0.0778	ACTB,PARP4,PARP3,CFLAR,XIAP,ARHGDIB,HSPB1
STAT3 Pathway	1.54	0.0845	RRAS2,TGFBR1,FGFR1,CDKN1A,IGF1R,BMPR2
NF-ÎºB Activation by Viruses	1.51	0.0833	ITGB1,AKT2,RRAS2,ITGAV,ITGA1,ITGA4
BMP signaling pathway	1.51	0.0833	FST,RRAS2,SMAD6,BMPR2,GREM1,XIAP
Thio-molybdenum Cofactor Biosynthesis	1.48	1	MOCOS
Sulfite Oxidation IV	1.48	1	SUOX
Prostanoid Biosynthesis	1.48	0.222	PTGES,PTGS1
Glioma Invasiveness Signaling	1.47	0.0909	TIMP3,RRAS2,ITGAV,CD44,TIMP2
Regulation of Cellular Mechanics by Calpain Protease	1.47	0.0909	ITGB1,RRAS2,VCL,CCND1,ITGA4
LXR/RXR Activation	1.46	0.0702	TLR4,LY96,MYLIP,SERPINF1,IL1B,PCYOX1,IL1R1,APOD
HER-2 Signaling in Breast Cancer	1.46	0.0811	ITGB1,AKT2,RRAS2,CDKN1A,MDM2,CCND1
Signaling by Rho Family GTPases	1.45	0.0578	MYL9,ROCK2,ITGB1,ACTR2,CDH2,NEDD4,NOX4,ACTR3,ACTB,CDC42EP2,GNG5,CDH13,ITGA4
Docosahexaenoic Acid (DHA) Signaling	1.45	0.105	AKT2,SERPINF1,IL1B,APP
IL-8 Signaling	1.45	0.0611	ROCK2,MYL9,AKT2,NOX4,RRAS2,ARAF,ITGAV,VEGFC,GNG5,CCND1,TEK
Atherosclerosis Signaling	1.45	0.0696	COL5A3,CSF1,PLA2G4C,IL1B,PCYOX1,PDGFD,ITGA4,APOD
p53 Signaling	1.41	0.0729	CDKN2A,AKT2,CDKN1A,PERP,MDM2,CCND1,SERPINE2
Glioblastoma Multiforme Signaling	1.4	0.0647	CDKN2A,AKT2,RRAS2,CDKN1A,IGF1R,MDM2,PDGFD,CCND1,WNT5B
Role of JAK1 and JAK3 in Î³c Cytokine Signaling	1.38	0.0862	STAT6,RRAS2,PTPN11,IRS2,JAK3
Role of IL-17F in Allergic Inflammatory Airway Diseases	1.38	0.1	TRAF3IP2,IL17RC,IL1B,CREB5
RhoA Signaling	1.37	0.0672	ROCK2,MYL9,ACTR2,NEDD4,ACTR3,ACTB,IGF1R,CDC42EP2
Role of Osteoblasts, Osteoclasts and Chondrocytes in Rheumatoid Arthritis	1.35	0.0571	ITGB1,AKT2,CTSK,CSF1,MMP14,SMAD6,BMPR2,IL1B,IL1R1,SFRP1,WNT5B,XIAP
Prostate Cancer Signaling	1.34	0.0759	AKT2,RRAS2,CDKN1A,MDM2,CREB5,CCND1
Agranulocyte Adhesion and Diapedesis	1.34	0.0606	ITGB1,MYL9,FN1,MMP14,ACTB,IL1B,ITGA1,IL1R1,ITGA4,MMP19
Role of JAK family kinases in IL-6-type Cytokine Signaling	1.32	0.12	IL6ST,PTPN11,OSMR
Calcium Signaling	1.32	0.0602	MYL9,CAMK2D,ATP2B1,TPM1,TRPC4,ASPH,CREB5,TPM2,RCAN2,RAP1A
Estrogen-Dependent Breast Cancer Signaling	1.3	0.082	AKT2,RRAS2,IGF1R,CREB5,CCND1
GM-CSF Signaling	1.3	0.082	AKT2,RRAS2,CAMK2D,PTPN11,CCND1
Rac Signaling	1.29	0.0686	ITGB1,ACTR2,NOX4,ACTR3,RRAS2,CD44,ITGA4
iNOS Signaling	1.28	0.093	TLR4,LY96,IFNGR2,JAK3
Complement System	1.28	0.115	C1R,SERPING1,C1S
NGF Signaling	1.26	0.0673	ROCK2,AKT2,RRAS2,PTPN11,MAP3K6,CREB5,RAP1A
Ubiquinol-10 Biosynthesis (Eukaryotic)	1.24	0.167	CYP7B1,MICAL2
Role of p14/p19ARF in Tumor Suppression	1.24	0.111	CDKN2A,NPM3,MDM2
FAK Signaling	1.24	0.0714	ITGB1,AKT2,RRAS2,ACTB,VCL,ITGA4
Neuregulin Signaling	1.22	0.0706	ITGB1,AKT2,RRAS2,PTPN11,EREG,ITGA4
Choline Degradation I	1.19	0.5	ALDH7A1
S-adenosyl-L-methionine Biosynthesis	1.19	0.5	MAT2B
4-aminobutyrate Degradation I	1.19	0.5	SUCLG2
L-serine Degradation	1.19	0.5	SDSL
Macropinocytosis Signaling	1.18	0.0758	ITGB1,ARF6,RRAS2,CSF1,PDGFD
Fatty Acid Activation	1.18	0.154	ACSL5,SLC27A3
Regulation of Actin-based Motility by Rho	1.18	0.069	ITGB1,MYL9,ACTR2,ACTR3,ACTB,ITGA4
Granulocyte Adhesion and Diapedesis	1.15	0.0581	ITGB1,MMP14,THY1,IL1B,ITGA1,IL1R1,HSPB1,ITGA4,MMP19
Colorectal Cancer Metastasis Signaling	1.13	0.0526	IL6ST,TLR4,AKT2,RRAS2,TGFBR1,MMP14,VEGFC,JAK3,GNG5,CCND1,WNT5B,MMP19
ERK/MAPK Signaling	1.11	0.0549	ITGB1,RRAS2,ARAF,PPP2R3A,PLA2G4C,CREB5,RAP1A,ELK3,HSPB1,ITGA4
IL-17 Signaling	1.08	0.0704	AKT2,TRAF3IP2,RRAS2,IL17RC,CEBPB
Extrinsic Prothrombin Activation Pathway	1.07	0.133	F10,TFPI
MIF-mediated Glucocorticoid Regulation	1.06	0.0938	TLR4,LY96,PLA2G4C
Telomerase Signaling	1.05	0.0638	AKT2,RRAS2,PPP2R3A,CDKN1A,TPP1,ELK3
Retinoic acid Mediated Apoptosis Signaling	1.04	0.0769	PARP4,TNFRSF10D,PARP3,CFLAR
IL-2 Signaling	1.04	0.0769	AKT2,RRAS2,PTPN11,JAK3
Stearate Biosynthesis I (Animals)	1	0.0882	ACOT2,ACSL5,SLC27A3
Interferon Signaling	1	0.0882	IFNGR2,STAT2,IFITM2
Acute Myeloid Leukemia Signaling	0.999	0.0667	AKT2,RRAS2,ARAF,FLT3LG,CCND1
Î³-linolenate Biosynthesis II (Animals)	0.975	0.118	ACSL5,SLC27A3
Mitochondrial L-carnitine Shuttle Pathway	0.975	0.118	ACSL5,SLC27A3
IL-17A Signaling in Fibroblasts	0.972	0.0857	TRAF3IP2,IL17RC,CEBPB
Xenobiotic Metabolism Signaling	0.967	0.0492	RRAS2,CAMK2D,MAP3K6,PPP2R3A,GSTA4,NQO1,CHST3,IL1B,CES2,ABCC3,SOD3,ALDH7A1
Cyclins and Cell Cycle Regulation	0.962	0.0649	CDKN2A,PPP2R3A,CDKN1A,CDKN2C,CCND1
NRF2-mediated Oxidative Stress Response	0.942	0.0523	AKR7A2,SOD2,RRAS2,DNAJC4,GSTA4,ACTB,NQO1,ENC1,SOD3
Myc Mediated Apoptosis Signaling	0.931	0.0702	CDKN2A,AKT2,RRAS2,IGF1R
Production of Nitric Oxide and Reactive Oxygen Species in Macrophages	0.909	0.0514	TLR4,AKT2,MAP3K6,PPP2R3A,IFNGR2,PCYOX1,JAK3,RAP1A,APOD
Glutamate Degradation III (via 4-aminobutyrate)	0.903	0.25	SUCLG2
Cardiomyocyte Differentiation via BMP Receptors	0.894	0.105	SMAD6,BMPR2
GADD45 Signaling	0.894	0.105	CDKN1A,CCND1
Tec Kinase Signaling	0.892	0.0526	ITGB1,TLR4,STAT6,ACTB,STAT2,JAK3,GNG5,ITGA4
ATM Signaling	0.891	0.0678	CDKN1A,MDM2,CREB5,NBN
Antiproliferative Role of Somatostatin Receptor 2	0.891	0.0678	RRAS2,PTPN11,CDKN1A,GNG5
Dendritic Cell Maturation	0.88	0.0523	TLR4,COL5A3,AKT2,IL32,RELB,IL1B,STAT2,CREB5
Germ Cell-Sertoli Cell Junction Signaling	0.869	0.0519	ITGB1,CDH2,RRAS2,TGFBR1,MAP3K6,ACTB,ZYX,A2M
Role of NANOG in Mammalian Embryonic Stem Cell Pluripotency	0.866	0.0566	IL6ST,AKT2,RRAS2,BMPR2,JAK3,WNT5B
MIF Regulation of Innate Immunity	0.844	0.075	TLR4,LY96,PLA2G4C
IL-17A Signaling in Airway Cells	0.835	0.0645	AKT2,TRAF3IP2,IL17RC,JAK3
Pyridoxal 5'-phosphate Salvage Pathway	0.835	0.0645	AKT2,FAM20B,ARAF,MAP3K6
Virus Entry via Endocytic Pathways	0.831	0.0588	ITGB1,RRAS2,ACTB,ITGA1,ITGA4
Endoplasmic Reticulum Stress Pathway	0.823	0.0952	ERN1,XBP1
Non-Small Cell Lung Cancer Signaling	0.817	0.0635	CDKN2A,AKT2,RRAS2,CCND1
ERK5 Signaling	0.817	0.0635	IL6ST,RRAS2,PTPN11,CREB5
Hypoxia Signaling in the Cardiovascular System	0.817	0.0635	NQO1,MDM2,CREB5,VHL
TGF-Î² Signaling	0.816	0.0581	RRAS2,TGFBR1,SMAD6,BMPR2,INHBA
Lysine Degradation II	0.813	0.2	ALDH7A1
Lysine Degradation V	0.813	0.2	ALDH7A1
PAK Signaling	0.801	0.0575	ITGB1,MYL9,RRAS2,PDGFD,ITGA4
IL-15 Signaling	0.799	0.0625	STAT6,AKT2,RRAS2,JAK3
Angiopoietin Signaling	0.799	0.0625	AKT2,RRAS2,PTPN11,TEK
Role of JAK1, JAK2 and TYK2 in Interferon Signaling	0.79	0.0909	IFNGR2,STAT2
GÎ±12/13 Signaling	0.787	0.0536	ROCK2,MYL9,CDH2,AKT2,RRAS2,CDH13
T Helper Cell Differentiation	0.782	0.0615	IL6ST,STAT6,TGFBR1,IFNGR2
TREM1 Signaling	0.766	0.0606	ITGB1,TLR4,AKT2,IL1B
Glutathione-mediated Detoxification	0.76	0.087	GSTA4,ANPEP
PPAR Signaling	0.759	0.0556	RRAS2,PPARD,IL1B,IL1R1,PDGFD
p38 MAPK Signaling	0.75	0.0522	TGFBR1,PLA2G4C,IL1B,IL1R1,CREB5,HSPB1
Regulation of eIF4 and p70S6K Signaling	0.749	0.05	ITGB1,AKT2,RRAS2,EIF4EBP3,PPP2R3A,RPS27L,ITGA4
Glycoaminoglycan-protein Linkage Region Biosynthesis	0.741	0.167	XYLT1
MSP-RON Signaling Pathway	0.737	0.0667	TLR4,CSF1,ACTB
FcÎ³ Receptor-mediated Phagocytosis in Macrophages and Monocytes	0.732	0.0543	ACTR2,AKT2,ARF6,ACTR3,ACTB
Estrogen-mediated S-phase Entry	0.731	0.0833	CDKN1A,CCND1
HMGB1 Signaling	0.727	0.0513	TLR4,AKT2,RRAS2,IFNGR2,IL1B,IL1R1
Sertoli Cell-Sertoli Cell Junction Signaling	0.724	0.0476	ITGB1,AKT2,RRAS2,MAP3K6,ACTB,JAM2,A2M,ITGA4
Heparan Sulfate Biosynthesis	0.717	0.0652	XYLT1,CHST3,EXT1
Role of NFAT in Cardiac Hypertrophy	0.714	0.0473	IL6ST,AKT2,RRAS2,TGFBR1,CAMK2D,IGF1R,GNG5,RCAN2
IL-4 Signaling	0.703	0.0571	STAT6,AKT2,RRAS2,JAK3
Glycine Betaine Degradation	0.681	0.143	SDSL
CNTF Signaling	0.68	0.0625	IL6ST,RRAS2,PTPN11
Antiproliferative Role of TOB in T Cell Signaling	0.678	0.0769	TGFBR1,TWSG1
Cdc42 Signaling	0.672	0.0492	ITGB1,MYL9,ACTR2,ACTR3,CDC42EP2,ITGA4
Adipogenesis pathway	0.672	0.0492	CDKN2A,FGF2,FGFR1,XBP1,CEBPB,FGF1
Cell Cycle: G2/M DNA Damage Checkpoint Regulation	0.663	0.0612	CDKN2A,CDKN1A,MDM2
IL-12 Signaling and Production in Macrophages	0.661	0.0488	TLR4,STAT6,AKT2,PCYOX1,CEBPB,APOD
VEGF Family Ligand-Receptor Interactions	0.66	0.0548	AKT2,RRAS2,PLA2G4C,VEGFC
Intrinsic Prothrombin Activation Pathway	0.654	0.0741	F10,COL5A3
Endometrial Cancer Signaling	0.646	0.06	AKT2,RRAS2,CCND1
Amyloid Processing	0.646	0.06	AKT2,BACE1,APP
Fatty Acid Î²-oxidation I	0.63	0.0714	ACSL5,SLC27A3
Superpathway of Methionine Degradation	0.63	0.0714	MAT2B,SUOX
Unfolded protein response	0.613	0.0577	ERN1,XBP1,CEBPB
VDR/RXR Activation	0.607	0.0519	IGFBP6,PPARD,CDKN1A,CEBPB
Hepatic Cholestasis	0.604	0.0452	TLR4,LY96,CYP7B1,IL1B,IL1R1,ABCC3,ATP8B1
Thrombopoietin Signaling	0.598	0.0566	RRAS2,PTPN11,IRS2
Ceramide Signaling	0.595	0.0513	S1PR3,AKT2,RRAS2,PPP2R3A
Reelin Signaling in Neurons	0.595	0.0513	ITGB1,ITGA1,ITGA4,APP
Role of JAK2 in Hormone-like Cytokine Signaling	0.587	0.0667	PTPN11,IRS2
Calcium Transport I	0.585	0.111	ATP2B1
Methylglyoxal Degradation III	0.585	0.111	AKR7A2
Altered T Cell and B Cell Signaling in Rheumatoid Arthritis	0.583	0.0506	TLR4,CSF1,RELB,IL1B
fMLP Signaling in Neutrophils	0.58	0.0476	ACTR2,NOX4,ACTR3,RRAS2,GNG5
Role of CHK Proteins in Cell Cycle Checkpoint Control	0.568	0.0545	PPP2R3A,CDKN1A,NBN
ErbB2-ErbB3 Signaling	0.568	0.0545	RRAS2,JAK3,CCND1
tRNA Splicing	0.567	0.0645	TSEN15,PDE4B
Synaptic Long Term Potentiation	0.56	0.0467	RRAS2,CAMK2D,CACNA1C,CREB5,RAP1A
Cardiac Hypertrophy Signaling	0.558	0.0419	ROCK2,MYL9,RRAS2,TGFBR1,MAP3K6,IGF1R,CACNA1C,GNG5,HSPB1
Protein Ubiquitination Pathway	0.549	0.041	CRYAB,PSMD10,NEDD4,USP13,DNAJC4,PSMB10,MDM2,VHL,XIAP,HSPB1
Inhibition of Angiogenesis by TSP1	0.547	0.0625	AKT2,TGFBR1
NAD Phosphorylation and Dephosphorylation	0.547	0.1	PXYLP1
Tight Junction Signaling	0.546	0.0432	MYL9,AKT2,TGFBR1,PPP2R3A,ACTB,JAM2,VCL
Type II Diabetes Mellitus Signaling	0.54	0.0459	AKT2,ACSL5,IRS2,SLC27A3,CEBPB
Hereditary Breast Cancer Signaling	0.54	0.0459	AKT2,RRAS2,CDKN1A,CCND1,NBN
IL-9 Signaling	0.529	0.0606	IRS2,JAK3
Eicosanoid Signaling	0.514	0.0508	PTGES,PLA2G4C,PTGS1
Acyl-CoA Hydrolysis	0.512	0.0909	ACOT2
B Cell Receptor Signaling	0.508	0.0419	AKT2,RRAS2,CAMK2D,PTPN11,MAP3K6,CREB5,RAP1A
Role of BRCA1 in DNA Damage Response	0.501	0.05	RBL2,CDKN1A,NBN
Cell Cycle Regulation by BTG Family Proteins	0.495	0.0571	PPP2R3A,CCND1
G Beta Gamma Signaling	0.494	0.046	AKT2,RRAS2,CAV2,GNG5
Salvage Pathways of Pyrimidine Ribonucleotides	0.494	0.046	AKT2,FAM20B,ARAF,MAP3K6
PCP pathway	0.489	0.0492	ROCK2,WNT5B,HSPB1
PI3K Signaling in B Lymphocytes	0.485	0.0435	TLR4,AKT2,RRAS2,CAMK2D,IRS2
GÎ±i Signaling	0.485	0.0435	S1PR3,RRAS2,RGS4,GNG5,RAP1A
Role of IL-17A in Psoriasis	0.481	0.0833	IL17RC
Hematopoiesis from Multipotent Stem Cells	0.481	0.0833	CSF1
Histamine Degradation	0.481	0.0833	ALDH7A1
PXR/RXR Activation	0.477	0.0484	AKT2,CES2,ABCC3
FXR/RXR Activation	0.477	0.0431	AKT2,SERPINF1,IL1B,PCYOX1,APOD
Chondroitin Sulfate Degradation (Metazoa)	0.453	0.0769	CD44
Phenylalanine Degradation IV (Mammalian, via Side Chain)	0.453	0.0769	SLC27A3
Fatty Acid Î±-oxidation	0.453	0.0769	ALDH7A1
Methionine Degradation I (to Homocysteine)	0.453	0.0769	MAT2B
Role of MAPK Signaling in the Pathogenesis of Influenza	0.443	0.0462	AKT2,RRAS2,PLA2G4C
Neurotrophin/TRK Signaling	0.443	0.0462	RRAS2,PTPN11,CREB5
Thyroid Cancer Signaling	0.434	0.0513	RRAS2,CCND1
GDNF Family Ligand-Receptor Interactions	0.432	0.0455	PDLIM7,RRAS2,IRS2
Chemokine Signaling	0.432	0.0455	ROCK2,RRAS2,CAMK2D
Amyotrophic Lateral Sclerosis Signaling	0.428	0.0426	CACNA1C,VEGFC,GRIK2,XIAP
DNA Double-Strand Break Repair by Homologous Recombination	0.427	0.0714	NBN
DNA Double-Strand Break Repair by Non-Homologous End Joining	0.427	0.0714	NBN
Telomere Extension by Telomerase	0.427	0.0714	NBN
nNOS Signaling in Skeletal Muscle Cells	0.427	0.0714	SNTB2
Dermatan Sulfate Degradation (Metazoa)	0.427	0.0714	CD44
Î³-glutamyl Cycle	0.427	0.0714	ANPEP
Oxidative Ethanol Degradation III	0.427	0.0714	ALDH7A1
Vitamin-C Transport	0.427	0.0714	SLC2A1
Mechanisms of Viral Exit from Host Cells	0.42	0.05	NEDD4,ACTB
Heparan Sulfate Biosynthesis (Late Stages)	0.42	0.05	CHST3,EXT1
Glutathione Redox Reactions I	0.404	0.0667	CLIC2
Cysteine Biosynthesis III (mammalia)	0.404	0.0667	MAT2B
UVC-Induced MAPK Signaling	0.394	0.0476	RRAS2,ARAF
IL-3 Signaling	0.392	0.0429	STAT6,AKT2,RRAS2
Prolactin Signaling	0.392	0.0429	RRAS2,PTPN11,CEBPB
Tryptophan Degradation X (Mammalian, via Tryptamine)	0.383	0.0625	ALDH7A1
Putrescine Degradation III	0.383	0.0625	ALDH7A1
Ethanol Degradation IV	0.383	0.0625	ALDH7A1
Chondroitin Sulfate Biosynthesis	0.382	0.0465	XYLT1,CHST3
Endothelin-1 Signaling	0.378	0.038	RRAS2,ARAF,PLA2G4C,PTGS1,EDNRA,CASP4
Toll-like Receptor Signaling	0.373	0.0417	TLR4,LY96,IL1B
CREB Signaling in Neurons	0.372	0.0377	AKT2,RRAS2,CAMK2D,GRIK2,CREB5,GNG5
Sphingosine-1-phosphate Signaling	0.371	0.0396	S1PR3,AKT2,CASP4,PDGFD
AMPK Signaling	0.365	0.0382	AKT2,SLC2A1,PPP2R3A,AK3,IRS2
Dermatan Sulfate Biosynthesis	0.359	0.0444	XYLT1,CHST3
PDGF Signaling	0.356	0.0405	RRAS2,PDGFD,JAK3
Fc Epsilon RI Signaling	0.349	0.0385	AKT2,RRAS2,PTPN11,PLA2G4C
Role of Cytokines in Mediating Communication between Immune Cells	0.348	0.0435	IL32,IL1B
Ephrin A Signaling	0.348	0.0435	ROCK2,PTPN11
Differential Regulation of Cytokine Production in Macrophages and T Helper Cells by IL-17A and IL-17F	0.345	0.0556	IL1B
Phospholipase C Signaling	0.332	0.0354	ITGB1,MYL9,RRAS2,PLA2G4C,CREB5,GNG5,RAP1A,ITGA4
Dopamine Degradation	0.328	0.0526	ALDH7A1
NAD Salvage Pathway II	0.328	0.0526	PXYLP1
DNA damage-induced 14-3-3Ïƒ Signaling	0.328	0.0526	AKT2
Glutamate Receptor Signaling	0.327	0.0417	GRIK2,GNG5
CD28 Signaling in T Helper Cells	0.322	0.037	ACTR2,AKT2,ACTR3,PTPN11
GÎ±s Signaling	0.322	0.037	ADD3,CREB5,GNG5,RAP1A
Lipid Antigen Presentation by CD1	0.312	0.05	ARF6
Maturity Onset Diabetes of Young (MODY) Signaling	0.312	0.05	CACNA1C
CCR3 Signaling in Eosinophils	0.309	0.0364	ROCK2,RRAS2,PLA2G4C,GNG5
Crosstalk between Dendritic Cells and Natural Killer Cells	0.308	0.0375	TLR4,CAMK2D,ACTB
Wnt/Ca+ pathway	0.308	0.04	CREB5,WNT5B
CTLA4 Signaling in Cytotoxic T Lymphocytes	0.301	0.037	AKT2,PTPN11,PPP2R3A
UVA-Induced MAPK Signaling	0.301	0.037	RRAS2,PARP4,PARP3
Semaphorin Signaling in Neurons	0.298	0.0392	ROCK2,ITGB1
Melanocyte Development and Pigmentation Signaling	0.294	0.0366	RRAS2,PTPN11,CREB5
Cellular Effects of Sildenafil (Viagra)	0.291	0.0354	MYL9,ACTB,CACNA1C,PDE4B
P2Y Purigenic Receptor Signaling Pathway	0.291	0.0354	AKT2,RRAS2,CREB5,GNG5
Lymphotoxin Î² Receptor Signaling	0.281	0.0377	AKT2,RELB
RANK Signaling in Osteoclasts	0.274	0.0353	AKT2,MAP3K6,XIAP
HIPPO signaling	0.274	0.0353	TEAD1,PPP2R3A,CD44
Activation of IRF by Cytosolic Pattern Recognition Receptors	0.273	0.037	STAT2,ADAR
Differential Regulation of Cytokine Production in Intestinal Epithelial Cells by IL-17A and IL-17F	0.27	0.0435	IL1B
CXCR4 Signaling	0.269	0.0338	ROCK2,MYL9,AKT2,RRAS2,GNG5
G-Protein Coupled Receptor Signaling	0.265	0.0331	S1PR3,AKT2,RRAS2,CAMK2D,RGS4,PDE4B,CREB5,RAP1A
Factors Promoting Cardiogenesis in Vertebrates	0.261	0.0345	NOX4,TGFBR1,BMPR2
IL-22 Signaling	0.258	0.0417	AKT2
Thrombin Signaling	0.256	0.033	ROCK2,MYL9,AKT2,RRAS2,CAMK2D,GNG5
IL-15 Production	0.247	0.04	JAK3
IL-17A Signaling in Gastric Cells	0.247	0.04	IL17RC
Ethanol Degradation II	0.247	0.04	ALDH7A1
TNFR2 Signaling	0.216	0.0357	XIAP
Retinol Biosynthesis	0.216	0.0357	CES2
Noradrenaline and Adrenaline Degradation	0.216	0.0357	ALDH7A1
G Protein Signaling Mediated by Tubby	0.207	0.0345	GNG5

## Sheet: cluster_4
Ingenuity Canonical Pathways	-log(p-value)	Ratio	Molecules
tRNA Charging	4.47	0.324	PARS2,LARS,CARS,TARS2,YARS,AARS2,EARS2,DARS2,HARS2,SARS2,SARS,EPRS
Heme Biosynthesis from Uroporphyrinogen-III I	4.28	1	UROD,PPOX,FECH,CPOX
Granzyme A Signaling	3.96	0.467	HIST1H1B,HIST1H1C,H1FX,CREBBP,HMGB2,H1F0,APEX1
ATM Signaling	3.48	0.237	SMC3,BRAT1,MAPK14,GADD45B,GADD45A,CREBBP,TP53BP1,MAPK13,CREB3L4,TDP1,MAPK12,CBX5,MAPK11,RAD50
Fatty Acid Î²-oxidation III (Unsaturated, Odd Number)	3.21	1	ECI2,EHHADH,ECI1
Oxidative Ethanol Degradation III	3.21	0.429	ALDH4A1,ALDH1B1,ALDH2,ALDH3A2,ACSS2,ALDH9A1
Putrescine Degradation III	2.85	0.375	ALDH4A1,ALDH1B1,ALDH2,ALDH3A2,SAT2,ALDH9A1
Ethanol Degradation IV	2.85	0.375	ALDH4A1,ALDH1B1,ALDH2,ALDH3A2,ACSS2,ALDH9A1
TNFR1 Signaling	2.8	0.234	MAP4K2,FADD,CASP6,IKBKB,MAP3K14,TRADD,PAK1,MADD,CASP9,CRADD,CASP2
Histamine Degradation	2.68	0.417	ALDH4A1,ALDH1B1,ALDH2,ALDH3A2,ALDH9A1
BER pathway	2.68	0.417	PNKP,APEX1,OGG1,XRCC1,LIG3
Proline Biosynthesis I	2.64	0.75	PYCRL,PYCR2,PYCR1
Amyloid Processing	2.57	0.22	CSNK1E,CAPN5,MAPK14,CDK5,CSNK1D,PRKAR1B,APH1B,PSEN2,MAPK13,MAPK12,MAPK11
Fatty Acid Î±-oxidation	2.5	0.385	ALDH4A1,ALDH1B1,ALDH2,ALDH3A2,ALDH9A1
Ethanol Degradation II	2.41	0.28	ALDH4A1,ALDH1B1,ALDH2,ALDH3A2,ACSS2,PECR,ALDH9A1
Parkinson's Signaling	2.34	0.357	MAPK14,CASP9,MAPK13,MAPK12,MAPK11
Leucine Degradation I	2.34	0.444	BCAT2,MCCC1,HMGCL,IVD
Heme Biosynthesis II	2.34	0.444	UROD,PPOX,FECH,CPOX
Selenocysteine Biosynthesis II (Archaea and Eukaryotes)	2.27	0.6	SEPHS2,SARS2,SARS
Galactose Degradation I (Leloir Pathway)	2.27	0.6	GALT,GALK1,GALM
Salvage Pathways of Pyrimidine Ribonucleotides	2.2	0.172	PYCRL,AK1,PAK1,NME4,CDK5,PIM1,CDK4,CSNK1D,LIMK2,PLK1,GRK5,MAPK7,UCKL1,PKN1,NME6
Palmitate Biosynthesis I (Animals)	2.14	1	OXSM,FASN
Fatty Acid Biosynthesis Initiation II	2.14	1	OXSM,FASN
Cardiolipin Biosynthesis II	2.14	1	PTPMT1,PGS1
AMPK Signaling	2.14	0.153	PRKAB2,PRKAB1,STRADA,PPP2R5D,SMARCD2,MAPK13,MAPK12,MAPK11,PPP2R5A,AK1,MAPK14,FASN,PRKAR1B,CPT2,ACACA,PIK3R2,MLYCD,CPT1C,INSR,ADRA1B
Tryptophan Degradation X (Mammalian, via Tryptamine)	2.06	0.312	ALDH4A1,ALDH1B1,ALDH2,ALDH3A2,ALDH9A1
Valine Degradation I	2.06	0.312	BCAT2,BCKDHA,ACAD8,DBT,EHHADH
Proline Biosynthesis II (from Arginine)	2	0.5	PYCRL,PYCR2,PYCR1
Arginine Degradation VI (Arginase 2 Pathway)	2	0.5	PYCRL,PYCR2,PYCR1
B Cell Receptor Signaling	1.84	0.138	MAP3K14,RAC2,GAB2,MAP2K7,CSK,CREBBP,SOS2,INPPL1,MAP3K4,CREB3L4,MAPK13,MAPK12,TCF3,MAPK11,CALM1 (includes others),IKBKB,MAPK14,FOXO1,GAB1,CARD10,INPP5K,PIK3R2,MAP3K3
Pyridoxal 5'-phosphate Salvage Pathway	1.84	0.177	PAK1,PNPO,CDK5,PIM1,CSNK1D,CDK4,GRK5,PLK1,LIMK2,MAPK7,PKN1
Dopamine Degradation	1.73	0.263	ALDH4A1,ALDH1B1,ALDH2,ALDH3A2,ALDH9A1
NAD Salvage Pathway II	1.73	0.263	ACP2,NMRK1,ACP6,NUDT12,NMNAT1
TWEAK Signaling	1.72	0.212	FADD,CASP6,IKBKB,MAP3K14,TRADD,CASP9,BAG4
Isoleucine Degradation I	1.7	0.308	BCAT2,ACAD8,ACAT1,EHHADH
NADH Repair	1.69	0.667	APOA1BP,CARKD
NAD Salvage Pathway III	1.69	0.667	NMRK1,NMNAT1
Methionine Salvage II (Mammalian)	1.69	0.667	MTR,BHMT2
Noradrenaline and Adrenaline Degradation	1.56	0.214	ALDH4A1,ALDH1B1,ALDH2,ALDH3A2,PECR,ALDH9A1
Superpathway of Methionine Degradation	1.56	0.214	CBS/LOC102724560,PCCA,MTR,FTSJ2,BHMT2,AHCY
Branched-chain Î±-keto acid Dehydrogenase Complex	1.41	0.5	BCKDHA,DBT
Phenylethylamine Degradation I	1.41	0.5	ALDH2,ALDH3A2
Eumelanin Biosynthesis	1.41	0.5	MIF,DDT
Myo-inositol Biosynthesis	1.41	0.5	ISYNA1,IMPA2
Phenylalanine Degradation I (Aerobic)	1.41	0.5	PCBD1,QDPR
Molybdenum Cofactor Biosynthesis	1.41	0.5	NFS1,MOCS3
April Mediated Signaling	1.41	0.184	IKBKB,MAP3K14,MAP2K7,MAPK14,MAPK13,MAPK12,MAPK11
4-1BB Signaling in T Lymphocytes	1.36	0.194	IKBKB,MAP3K14,MAPK14,MAPK13,MAPK12,MAPK11
Pyrimidine Ribonucleotides De Novo Biosynthesis	1.32	0.208	NME4,AK1,CTPS2,CAD,NME6
B Cell Activating Factor Signaling	1.31	0.175	IKBKB,MAP3K14,MAP2K7,MAPK14,MAPK13,MAPK12,MAPK11
Phosphatidylglycerol Biosynthesis II (Non-plastidic)	1.3	0.235	AGPAT4,GPAM,PTPMT1,PGS1
D-myo-inositol (1,4,5)-trisphosphate Degradation	1.3	0.235	INPP5E,IMPA2,INPPL1,INPP5K
Molecular Mechanisms of Cancer	1.28	0.111	RAC2,RAPGEF1,GAB2,SMAD3,BMP2,SOS2,LRP6,CDK4,PSEN2,MAPK13,MAPK11,CDC25B,CASP6,PAK1,CASP9,RHOB,CDK5,RHOD,SUFU,PRKAR1B,ARHGEF3,PIK3R2,WNT2B,CREBBP,DVL1,GNAI1,TCF3,MAPK12,APC,SIN3A,FADD,MAPK14,FOXO1,GAB1,APH1B,ARHGEF18,LEF1,ADCY7,CTNND1
Role of JAK family kinases in IL-6-type Cytokine Signaling	1.25	0.2	MAPK14,IL6R,MAPK13,MAPK12,MAPK11
Assembly of RNA Polymerase III Complex	1.22	0.273	GTF3C1,GTF3C4,BRF1
Serine Biosynthesis	1.22	0.4	PSPH,PHGDH
Adenine and Adenosine Salvage III	1.22	0.4	ADAL,ADA
Purine Ribonucleosides Degradation to Ribose-1-phosphate	1.22	0.4	ADAL,ADA
Cell Cycle Control of Chromosomal Replication	1.19	0.192	ORC2,CDK5,ORC3,ORC5,CDK4
Superpathway of Cholesterol Biosynthesis	1.19	0.192	FDPS,DHCR7,DHCR24,MVK,ACAT1
CDK5 Signaling	1.18	0.134	LAMA5,PPP2R5D,MAPK13,MAPK12,MAPK11,PPP2R5A,PPP1R3D,MAPK14,CDK5,PPP1R7,PRKAR1B,MAPK7,ADCY7
GNRH Signaling	1.17	0.127	MAP3K14,MAP2K7,CREBBP,SOS2,GNAI1,MAP3K4,CREB3L4,MAPK13,MAPK12,MAPK11,PAK1,MAPK14,PRKAR1B,MAPK7,MAP3K3,ADCY7
iNOS Signaling	1.16	0.163	IKBKB,CALM1 (includes others),MAPK14,CREBBP,MAPK13,MAPK12,MAPK11
GADD45 Signaling	1.14	0.211	GADD45B,GADD45A,CDK4,MAP3K4
Pyrimidine Deoxyribonucleotides De Novo Biosynthesis I	1.14	0.211	NME4,AK1,DTYMK,NME6
Cleavage and Polyadenylation of Pre-mRNA	1.12	0.25	CSTF1,CPSF1,CPSF4
SAPK/JNK Signaling	1.08	0.132	MAP4K2,FADD,RAC2,TRADD,MAP2K7,GADD45A,GAB1,SOS2,PIK3R2,MAP3K4,MAPK12,MAP3K3
Fatty Acid Î²-oxidation I	1.08	0.179	ECI2,EHHADH,IVD,ACAA2,ECI1
Lipoate Biosynthesis and Incorporation II	1.07	1	LIAS
4-hydroxyproline Degradation I	1.07	1	ALDH4A1
Phosphatidylethanolamine Biosynthesis III	1.07	1	PTDSS2
D-mannose Degradation	1.07	1	MPI
Alanine Biosynthesis III	1.07	1	NFS1
Phenylalanine Degradation IV (Mammalian, via Side Chain)	1.04	0.231	AASDH,ALDH2,ALDH3A2
3-phosphoinositide Degradation	1.03	0.121	PPP1R12C,INPP5E,PPP2R5D,EPHX2,NUDT12,PTPMT1,MTMR1,INPPL1,PPP2R5A,CDC25B,MTMR4,TMEM55A,PPP1R7,INPP5K,ALPL,THTPA
Germ Cell-Sertoli Cell Junction Signaling	0.984	0.117	RAC2,MAP3K14,MAP2K7,LIMK2,MAP3K4,MAPK12,TUBB2B,EPN2,PAK1,AGGF1,MAPK14,RHOB,RHOD,KEAP1,PIK3R2,JUP,MAP3K3,CTNND1
RANK Signaling in Osteoclasts	0.979	0.129	IKBKB,CALM1 (includes others),MAP3K14,MAP2K7,MAPK14,MAPK13,PIK3R2,MAP3K4,MAPK12,MAPK11,MAP3K3
IL-10 Signaling	0.978	0.136	IKBKB,MAP3K14,IL4R,MAPK14,SP1,BLVRB,MAPK13,MAPK12,MAPK11
Role of Wnt/GSK-3Î² Signaling in the Pathogenesis of Influenza	0.978	0.136	CSNK1E,SIAH1,NCOA2,DVL1,WNT2B,CSNK1D,LEF1,TCF3,APC
DNA Double-Strand Break Repair by Non-Homologous End Joining	0.958	0.214	RAD50,XRCC1,LIG3
Colanic Acid Building Blocks Biosynthesis	0.958	0.214	GALT,GALK1,MPI
Pyrimidine Ribonucleotides Interconversion	0.953	0.182	NME4,AK1,CTPS2,NME6
Basal Cell Carcinoma Signaling	0.947	0.134	KIF7,SUFU,BMP2,DVL1,WNT2B,LEF1,TCF3,HKR1,APC
Superpathway of Serine and Glycine Biosynthesis I	0.944	0.286	PSPH,PHGDH
Induction of Apoptosis by HIV1	0.903	0.136	FADD,IKBKB,MAP3K14,TRADD,MAP2K7,CASP9,SLC25A10,MAPK12
Superpathway of D-myo-inositol (1,4,5)-trisphosphate Metabolism	0.899	0.174	INPP5E,IMPA2,INPPL1,INPP5K
Nur77 Signaling in T Lymphocytes	0.89	0.14	CALM1 (includes others),HDAC9,CASP9,MEF2D,MAPK7,MAP3K3,SIN3A
Superpathway of Geranylgeranyldiphosphate Biosynthesis I (via Mevalonate)	0.888	0.2	FDPS,MVK,ACAT1
Cysteine Biosynthesis III (mammalia)	0.888	0.2	CBS/LOC102724560,FTSJ2,AHCY
Circadian Rhythm Signaling	0.882	0.156	CSNK1E,PER1,CREBBP,CSNK1D,CREB3L4
Role of BRCA1 in DNA Damage Response	0.872	0.133	FANCE,GADD45A,FANCF,SMARCD2,SLC19A1,PLK1,FANCL,RAD50
FLT3 Signaling in Hematopoietic Progenitor Cells	0.861	0.129	GAB2,MAPK14,SOS2,CREBBP,CREB3L4,MAPK13,PIK3R2,MAPK12,MAPK11
CD27 Signaling in Lymphocytes	0.857	0.137	IKBKB,MAP3K14,MAP2K7,CASP9,MAP3K4,MAPK12,MAP3K3
PPARÎ±/RXRÎ± Activation	0.854	0.112	MAP3K14,MAP2K7,PRKAB2,PRKAB1,SMAD3,CREBBP,SOS2,NCOA6,BCL3,PLCL2,ACVR2B,IKBKB,MAPK14,FASN,PRKAR1B,INSR,ADCY7,MED24
IL-22 Signaling	0.848	0.167	MAPK14,MAPK13,MAPK12,MAPK11
Sucrose Degradation V (Mammalian)	0.843	0.25	GALM,DAK
Oleate Biosynthesis II (Animals)	0.843	0.25	SCD5,UFSP2
Mitochondrial Dysfunction	0.836	0.111	SDHA,UCP2,NDUFA7,ATP5D,NDUFS7,NDUFV3,NDUFB8,PSEN2,DHODH,MAPK12,CASP9,TXN2,NDUFS2,APH1B,NDUFA3,ATPAF2,CPT1C,ACO1
Wnt/Î²-catenin Signaling	0.819	0.11	AXIN2,PPP2R5D,CREBBP,DVL1,LRP6,WNT2B,CSNK1D,TLE1,BCL9,ACVR2B,TCF3,APC,PPP2R5A,CSNK1E,CDH3,TLE3,LEF1,PIN1
TR/RXR Activation	0.805	0.122	UCP2,LDLR,SCARB1,GPS2,NCOA2,FASN,NCOA6,ACACA,BCL3,PIK3R2
Mouse Embryonic Stem Cell Pluripotency	0.805	0.12	MAPK14,DVL1,SOS2,CREBBP,LEF1,MAPK13,PIK3R2,MAPK12,TCF3,MAPK11,APC
IL-17A Signaling in Gastric Cells	0.801	0.16	MAPK14,MAPK13,MAPK12,MAPK11
L-carnitine Biosynthesis	0.788	0.5	ALDH9A1
Dolichol and Dolichyl Phosphate Biosynthesis	0.788	0.5	DHDDS
Proline Degradation	0.788	0.5	ALDH4A1
Alanine Degradation III	0.788	0.5	GPT2
Alanine Biosynthesis II	0.788	0.5	GPT2
L-cysteine Degradation III	0.788	0.5	MPST
Uridine-5'-phosphate Biosynthesis	0.788	0.5	CAD
GDP-L-fucose Biosynthesis II (from L-fucose)	0.788	0.5	FUK
Thiosulfate Disproportionation III (Rhodanese)	0.788	0.5	MOCS3
L-glutamine Biosynthesis II (tRNA-dependent)	0.788	0.5	GATB
Cysteine Biosynthesis/Homocysteine Degradation	0.788	0.5	CBS/LOC102724560
NAD Biosynthesis III	0.788	0.5	NMNAT1
4-aminobutyrate Degradation I	0.788	0.5	ALDH5A1
Glutamate Biosynthesis II	0.788	0.5	GLUD2
Glutamate Degradation X	0.788	0.5	GLUD2
CD40 Signaling	0.786	0.127	IKBKB,MAP3K14,MAP2K7,MAPK14,MAPK13,PIK3R2,MAPK12,MAPK11
Insulin Receptor Signaling	0.775	0.113	RAPGEF1,FOXO4,SOS2,INPPL1,NCK1,VAMP2,PPP1R3D,GAB1,FOXO1,PPP1R7,PRKAR1B,INSR,INPP5K,PIK3R2
EGF Signaling	0.765	0.13	MAP2K7,MAPK14,SOS2,MAPK13,PIK3R2,MAPK12,MAPK11
Fc Epsilon RI Signaling	0.765	0.115	RAC2,MAP2K7,MAPK14,GAB1,SOS2,INPPL1,MAPK13,PIK3R2,INPP5K,MAPK12,MAPK11,JMJD7-PLA2G4B
IL-17A Signaling in Fibroblasts	0.763	0.143	IKBKB,MAPK14,MAPK13,MAPK12,MAPK11
p38 MAPK Signaling	0.75	0.113	FADD,CDC25B,TRADD,MAPK14,MAPKAPK3,MEF2D,CREBBP,MKNK2,MAPK13,CREB3L4,MAPK12,MAPK11,JMJD7-PLA2G4B
Corticotropin Releasing Hormone Signaling	0.745	0.114	CALM1 (includes others),MAPK14,MEF2D,CREBBP,GNAI1,PRKAR1B,CREB3L4,MAPK13,MAPK12,ADCY7,MAPK11,NPR2
Role of CHK Proteins in Cell Cycle Checkpoint Control	0.736	0.127	PPP2R5D,RAD17,SLC19A1,PLK1,RAD50,PPP2R5A,RAD1
HIPPO signaling	0.736	0.118	CSNK1E,PPP1R3D,PPP1R7,PPP2R5D,SMAD3,CSNK1D,INADL,AMOT,DLG3,PPP2R5A
PTEN Signaling	0.731	0.112	MAST2,FOXO4,RAC2,SOS2,INPPL1,CNKSR3,IKBKB,CASP9,FOXO1,PIK3R2,INPP5K,INSR,MAGI2
Xenobiotic Metabolism Signaling	0.721	0.102	MAP3K14,ALDH1B1,ALDH4A1,MAP2K7,PPP2R5D,CREBBP,MAF,MAPK13,MAP3K4,MAPK12,MAPK11,PPP2R5A,ALDH9A1,CHST15,MAPK14,ALDH3A2,KEAP1,GSTM4,CHST10,MAPK7,NDST2,PIK3R2,ALDH16A1,MAP3K3,ALDH5A1
HIF1Î± Signaling	0.719	0.115	EGLN2,MAPK14,MMP15,CREBBP,VEGFB,MAPK13,PIK3R2,MAPK7,MAPK12,MAPK11,APEX1
1D-myo-inositol Hexakisphosphate Biosynthesis II (Mammalian)	0.714	0.167	INPP5E,INPPL1,INPP5K
D-myo-inositol (1,3,4)-trisphosphate Biosynthesis	0.714	0.167	INPP5E,INPPL1,INPP5K
Serotonin Degradation	0.714	0.13	ALDH4A1,ALDH1B1,ALDH2,ALDH3A2,PECR,ALDH9A1
TGF-Î² Signaling	0.714	0.116	ZFYVE9,MAPK14,SMAD3,BMP2,SOS2,CREBBP,MAPK13,ACVR2B,MAPK12,MAPK11
Ketogenesis	0.685	0.2	ACAT1,HMGCL
NAD Phosphorylation and Dephosphorylation	0.685	0.2	ACP2,ACP6
Pentose Phosphate Pathway	0.685	0.2	PGD,TKT
Dolichyl-diphosphooligosaccharide Biosynthesis	0.685	0.2	ALG3,DPAGT1
Cardiac Hypertrophy Signaling	0.678	0.102	MAP3K14,MAP2K7,MAPKAPK3,CREBBP,MYL5,IL6R,GNAI1,MAP3K4,PLCL2,MAPK13,MAPK12,MAPK11,CALM1 (includes others),MAPK14,RHOB,RHOD,MEF2D,PRKAR1B,PIK3R2,MAP3K3,ADCY7,ADRA1B
Hereditary Breast Cancer Signaling	0.668	0.11	FANCE,HDAC9,GADD45B,GADD45A,CREBBP,FANCF,CDK4,SMARCD2,SLC19A1,PIK3R2,FANCL,RAD50
Reelin Signaling in Neurons	0.666	0.115	PAFAH1B2,APBB1,APOE,MAP2K7,CDK5,ARHGEF3,PIK3R2,MAPK12,VLDLR
Sonic Hedgehog Signaling	0.639	0.138	ADRBK1,SUFU,PRKAR1B,HKR1
Production of Nitric Oxide and Reactive Oxygen Species in Macrophages	0.635	0.103	APOE,MAP3K14,MAP2K7,PPP2R5D,CREBBP,MAP3K4,MAPK13,MAPK12,MAPK11,PPP2R5A,IKBKB,PPP1R3D,MAPK14,RHOB,PPP1R7,RHOD,PIK3R2,MAP3K3
Death Receptor Signaling	0.632	0.111	FADD,CASP6,IKBKB,MAP3K14,TRADD,MAP2K7,CASP9,CRADD,CASP2,PARP8
Diphthamide Biosynthesis	0.631	0.333	DPH6
5-aminoimidazole Ribonucleotide Biosynthesis I	0.631	0.333	PFAS
Coenzyme A Biosynthesis	0.631	0.333	PPCDC
D-glucuronate Degradation I	0.631	0.333	CRYL1
Inosine-5'-phosphate Biosynthesis II	0.631	0.333	ATIC
Oxidized GTP and dGTP Detoxification	0.631	0.333	DDX6
Tyrosine Degradation I	0.631	0.333	GSTZ1
Tyrosine Biosynthesis IV	0.631	0.333	PCBD1
Adipogenesis pathway	0.626	0.107	HDAC9,LPIN1,ATG7,CDK5,FOXO1,BMP2,SMAD3,KLF5,SETDB1,FBXW7,KLF3,ERCC2,SIN3A
DNA Methylation and Transcriptional Repression Signaling	0.622	0.15	DNMT3A,CHD4,SIN3A
Glutaryl-CoA Degradation	0.622	0.182	ACAT1,EHHADH
Mevalonate Pathway I	0.622	0.182	MVK,ACAT1
Bile Acid Biosynthesis, Neutral Pathway	0.622	0.182	AMACR,CYP27A1
Purine Nucleotides De Novo Biosynthesis II	0.622	0.182	PFAS,ATIC
IL-1 Signaling	0.613	0.11	IKBKB,MAP3K14,MAP2K7,MAPK14,GNAI1,PRKAR1B,MAPK13,MAPK12,ADCY7,MAPK11
HGF Signaling	0.605	0.108	RAPGEF1,MAP3K14,MAP2K7,PAK1,ELF2,GAB1,SOS2,PIK3R2,MAP3K4,MAPK12,MAP3K3
FGF Signaling	0.604	0.111	MAPK14,GAB1,SOS2,CREBBP,CREB3L4,MAPK13,PIK3R2,MAPK12,MAPK11
Type I Diabetes Mellitus Signaling	0.588	0.107	FADD,IKBKB,MAP3K14,TRADD,MAP2K7,MAPK14,CASP9,SOCS6,MAPK13,MAPK12,MAPK11
LPS-stimulated MAPK Signaling	0.574	0.111	IKBKB,MAP3K14,PAK1,MAPK14,MAPK13,PIK3R2,MAPK12,MAPK11
Triacylglycerol Biosynthesis	0.572	0.129	AGPAT4,GPAM,LPIN1,DBT
NGF Signaling	0.571	0.106	IKBKB,MAP3K14,GAB1,SOS2,CREBBP,CREB3L4,PIK3R2,MAPK7,MAP3K4,MAPK12,MAP3K3
ErbB Signaling	0.565	0.108	PAK1,MAPK14,FOXO1,SOS2,MAPK13,NCK1,PIK3R2,MAPK12,MAPK11
Mitotic Roles of Polo-Like Kinase	0.564	0.113	CDC25B,KIF23,SMC3,PPP2R5D,PLK2,PLK1,PPP2R5A
Inhibition of Angiogenesis by TSP1	0.542	0.125	MAPK14,MAPK13,MAPK12,MAPK11
Arsenate Detoxification I (Glutaredoxin)	0.524	0.25	AS3MT
NAD Biosynthesis from 2-amino-3-carboxymuconate Semialdehyde	0.524	0.25	NMNAT1
Pentose Phosphate Pathway (Oxidative Branch)	0.524	0.25	PGD
Heme Degradation	0.524	0.25	BLVRB
Spermine and Spermidine Degradation I	0.524	0.25	SAT2
Methylmalonyl Pathway	0.524	0.25	PCCA
Geranylgeranyldiphosphate Biosynthesis	0.524	0.25	FDPS
Biotin-carboxyl Carrier Protein Assembly	0.524	0.25	ACACA
Arginine Degradation I (Arginase Pathway)	0.524	0.25	ALDH4A1
Trans, trans-farnesyl Diphosphate Biosynthesis	0.524	0.25	FDPS
Glutamate Degradation III (via 4-aminobutyrate)	0.524	0.25	ALDH5A1
Acetate Conversion to Acetyl-CoA	0.524	0.25	ACSS2
Dopamine-DARPP32 Feedback in cAMP Signaling	0.52	0.0993	PPP2R5D,CREBBP,CSNK1D,GNAI1,PLCL2,CREB3L4,PPP2R5A,CSNK1E,CALM1 (includes others),PPP1R3D,CDK5,PPP1R7,CAMKK1,PRKAR1B,ADCY7
Cholesterol Biosynthesis I	0.517	0.154	DHCR7,DHCR24
Cholesterol Biosynthesis II (via 24,25-dihydrolanosterol)	0.517	0.154	DHCR7,DHCR24
Cholesterol Biosynthesis III (via Desmosterol)	0.517	0.154	DHCR7,DHCR24
Methionine Degradation I (to Homocysteine)	0.517	0.154	FTSJ2,AHCY
Paxillin Signaling	0.51	0.103	PAK1,TLN2,MAPK14,CSK,SOS2,MAPK13,NCK1,PIK3R2,MAPK12,MAPK11
Epithelial Adherens Junction Signaling	0.494	0.0986	RAPGEF1,MYL5,ACVR2B,TCF3,APC,TUBB2B,EPN2,AGGF1,KEAP1,SSX2IP,LEF1,JUP,MAGI2,CTNND1
Stearate Biosynthesis I (Animals)	0.486	0.118	FAM213B,DHCR24,FASN,DBT
Chemokine Signaling	0.484	0.106	CALM1 (includes others),MAPK14,GNAI1,LIMK2,MAPK13,MAPK12,MAPK11
Dopamine Receptor Signaling	0.481	0.104	PPP1R3D,PPP1R7,PPP2R5D,PRKAR1B,ADCY7,PCBD1,PPP2R5A,QDPR
Tumoricidal Function of Hepatic Natural Killer Cells	0.476	0.125	FADD,CASP6,CASP9
nNOS Signaling in Skeletal Muscle Cells	0.473	0.143	CALM1 (includes others),SNTA1
Sertoli Cell-Sertoli Cell Junction Signaling	0.45	0.0952	MAP3K14,MAP2K7,MAP3K4,MAPK13,MAPK12,MAPK11,TUBB2B,EPN2,EPB41,AGGF1,MAPK14,KEAP1,PRKAR1B,JUP,MAGI2,MAP3K3
Prostate Cancer Signaling	0.448	0.101	CASP9,FOXO1,SOS2,CREBBP,LEF1,CREB3L4,PIK3R2,SIN3A
Lysine Degradation II	0.445	0.2	AASDH
Lysine Degradation V	0.445	0.2	AASDH
2-oxobutanoate Degradation I	0.445	0.2	PCCA
Chronic Myeloid Leukemia Signaling	0.434	0.0989	GAB2,IKBKB,HDAC9,MECOM,SMAD3,SOS2,CDK4,PIK3R2,SIN3A
CDP-diacylglycerol Biosynthesis I	0.433	0.133	AGPAT4,GPAM
Adenosine Nucleotides Degradation II	0.433	0.133	ADAL,ADA
RAR Activation	0.429	0.0941	NSD1,CSK,SMAD3,BMP2,CREBBP,SMARCD2,MAPK13,ERCC2,MAPK12,MAPK11,MAPK14,PNRC1,PRKAR1B,PIK3R2,NR2F6,ADCY7
ERK/MAPK Signaling	0.422	0.0934	RAPGEF1,RAC2,PPP2R5D,CREBBP,SOS2,CREB3L4,MKNK2,PPP2R5A,KSR1,ELF2,PAK1,PPP1R3D,TLN2,PPP1R7,PRKAR1B,PIK3R2,JMJD7-PLA2G4B
UVA-Induced MAPK Signaling	0.417	0.0988	MAPK14,CASP9,PARP8,PLCL2,MAPK13,PIK3R2,MAPK12,MAPK11
Glucocorticoid Receptor Signaling	0.415	0.0916	MAP3K14,MAP2K7,CDKN1C,PRKAB1,HSPA14,PRKAB2,SMAD3,CREBBP,SOS2,SMARCD2,MAPK13,MAPK12,ERCC2,MAPK11,TSC22D3,IKBKB,TAF6L,MAPK14,NCOA2,PLAU,PIK3R2,CREBZF,TAF15
Netrin Signaling	0.413	0.108	RAC2,PRKAR1B,NCK1,ABLIM1
Notch Signaling	0.413	0.108	APH1B,PSEN2,DLL4,DTX2
STAT3 Pathway	0.399	0.0986	MAPK14,PIM1,SOCS6,MAPK13,INSR,MAPK12,MAPK11
Cell Cycle: G2/M DNA Damage Checkpoint Regulation	0.393	0.102	CDC25B,TOP2B,GADD45A,PTPMT1,PLK1
HMGB1 Signaling	0.388	0.094	MAP2K7,KAT7,MAPK14,SP1,RHOB,RHOD,MAPK13,PIK3R2,MAPK12,MAPK11,KAT2A
Arginine Biosynthesis IV	0.384	0.167	GLUD2
Pentose Phosphate Pathway (Non-oxidative Branch)	0.384	0.167	TKT
Acetyl-CoA Biosynthesis I (Pyruvate Dehydrogenase Complex)	0.384	0.167	DBT
Glycogen Biosynthesis II (from UDP-D-Glucose)	0.384	0.167	GYG2
Glycoaminoglycan-protein Linkage Region Biosynthesis	0.384	0.167	B3GALT6
GDP-mannose Biosynthesis	0.384	0.167	MPI
Toll-like Receptor Signaling	0.383	0.0972	SIGIRR,IKBKB,MAP3K14,MAPK14,MAPK13,MAPK12,MAPK11
BMP signaling pathway	0.383	0.0972	MAPK14,BMP2,CREBBP,PRKAR1B,MAPK13,MAPK12,MAPK11
Mitochondrial L-carnitine Shuttle Pathway	0.366	0.118	CPT2,CPT1C
Tryptophan Degradation III (Eukaryotic)	0.366	0.118	ACAT1,EHHADH
p53 Signaling	0.366	0.0938	CASP6,HDAC9,GADD45B,MAPK14,GADD45A,ADCK3,CSNK1D,CDK4,PIK3R2
IL-17A Signaling in Airway Cells	0.363	0.0968	IKBKB,MAPK14,MAPK13,PIK3R2,MAPK12,MAPK11
Semaphorin Signaling in Neurons	0.357	0.098	PAK1,CDK5,RHOB,RHOD,LIMK2
UVB-Induced MAPK Signaling	0.357	0.098	MAPK14,MAPK13,PIK3R2,MAPK12,MAPK11
Role of PKR in Interferon Induction and Antiviral Response	0.351	0.1	FADD,IKBKB,MAPK14,CASP9
ERK5 Signaling	0.348	0.0952	GAB1,MEF2D,CREBBP,CREB3L4,MAPK7,MAP3K3
Type II Diabetes Mellitus Signaling	0.348	0.0917	IKBKB,MAP3K14,TRADD,MAP2K7,PRKAB2,PRKAB1,SOCS6,PIK3R2,INSR,MAPK12
Cytotoxic T Lymphocyte-mediated Apoptosis of Target Cells	0.344	0.103	FADD,CASP6,CASP9
Role of IL-17A in Arthritis	0.341	0.0962	MAPK14,MAPK13,PIK3R2,MAPK12,MAPK11
Acute Myeloid Leukemia Signaling	0.341	0.0933	MAP2K7,PIM1,SOS2,LEF1,JUP,PIK3R2,TCF3
Purine Nucleotides Degradation II (Aerobic)	0.337	0.111	ADAL,ADA
CCR3 Signaling in Eosinophils	0.337	0.0909	CALM1 (includes others),PAK1,MAPK14,GNAI1,LIMK2,MAPK13,PIK3R2,MAPK12,MAPK11,JMJD7-PLA2G4B
Factors Promoting Cardiogenesis in Vertebrates	0.335	0.092	MAPK14,BMP2,DVL1,LRP6,LEF1,ACVR2B,TCF3,APC
Phosphatidylcholine Biosynthesis I	0.334	0.143	CHKB
Ketolysis	0.334	0.143	ACAT1
Glycine Betaine Degradation	0.334	0.143	BHMT2
Angiopoietin Signaling	0.333	0.0938	IKBKB,PAK1,CASP9,FOXO1,NCK1,PIK3R2
Gap Junction Signaling	0.325	0.089	SOS2,CSNK1D,GNAI1,PLCL2,TUBB2B,CSNK1E,SP1,SGSM3,PRKAR1B,PIK3R2,MAPK7,NPR2,ADCY7
Lymphotoxin Î² Receptor Signaling	0.325	0.0943	IKBKB,MAP3K14,CASP9,CREBBP,PIK3R2
Colorectal Cancer Metastasis Signaling	0.323	0.0877	SIAH1,ADRBK1,SMAD3,DVL1,MMP15,LRP6,SOS2,WNT2B,IL6R,VEGFB,TCF3,MAPK12,APC,CASP9,RHOB,RHOD,PRKAR1B,LEF1,PIK3R2,ADCY7
Endothelin-1 Signaling	0.322	0.0886	PLA2G16,GNAI1,PLCL2,MAPK13,MAPK12,MAPK11,CASP6,MAPK14,CASP9,GAB1,CASP2,MAPK7,PIK3R2,ADCY7
CCR5 Signaling in Macrophages	0.319	0.0923	CALM1 (includes others),MAPK14,GNAI1,MAPK13,MAPK12,MAPK11
Role of MAPK Signaling in the Pathogenesis of Influenza	0.319	0.0923	PLA2G16,MAP2K7,MAPK14,MAPK13,MAPK12,MAPK11
Neurotrophin/TRK Signaling	0.319	0.0923	MAP2K7,GAB1,SOS2,CREBBP,CREB3L4,PIK3R2
UVC-Induced MAPK Signaling	0.315	0.0952	MAPK14,MAPK13,MAPK12,MAPK11
Estrogen Receptor Signaling	0.312	0.0887	MED18,TAF6L,THRAP3,NCOA2,MED15,SOS2,CREBBP,MED16,ERCC2,MED24,TAF15
DNA damage-induced 14-3-3Ïƒ Signaling	0.311	0.105	RAD17,RAD1
Activation of IRF by Cytosolic Pattern Recognition Receptors	0.31	0.0926	FADD,IKBKB,CREBBP,PIN1,MAPK12
Sphingosine-1-phosphate Signaling	0.308	0.0891	CASP6,CASP9,RHOB,RHOD,CASP2,GNAI1,PLCL2,PIK3R2,ADCY7
GDNF Family Ligand-Receptor Interactions	0.306	0.0909	DOK4,GAB1,SOS2,NCK1,PIK3R2,MAPK12
tRNA Splicing	0.303	0.0968	TSEN34,TSEN2,APEX1
Chondroitin Sulfate Biosynthesis	0.299	0.093	B3GALT6,CHST10,NDST2,CHST15
Oxidative Phosphorylation	0.297	0.0882	SDHA,ATP5D,NDUFA7,NDUFS7,NDUFV3,NDUFS2,NDUFA3,NDUFB8,ATPAF2
ErbB2-ErbB3 Signaling	0.295	0.0909	SP1,FOXO1,ETV4,SOS2,PIK3R2
Phosphatidylethanolamine Biosynthesis II	0.294	0.125	CHKB
Renal Cell Carcinoma Signaling	0.293	0.0896	RAPGEF1,PAK1,GAB1,SOS2,CREBBP,PIK3R2
D-myo-inositol (1,4,5,6)-Tetrakisphosphate Biosynthesis	0.285	0.087	CDC25B,MTMR4,PPP1R12C,PPP1R7,PPP2R5D,EPHX2,NUDT12,ALPL,THTPA,PPP2R5A
D-myo-inositol (3,4,5,6)-tetrakisphosphate Biosynthesis	0.285	0.087	CDC25B,MTMR4,PPP1R12C,PPP1R7,PPP2R5D,EPHX2,NUDT12,ALPL,THTPA,PPP2R5A
IL-6 Signaling	0.285	0.087	IKBKB,MAP3K14,MAP2K7,MAPK14,SOS2,IL6R,MAPK13,PIK3R2,MAPK12,MAPK11
Role of Osteoblasts, Osteoclasts and Chondrocytes in Rheumatoid Arthritis	0.283	0.0857	MAP3K14,MAP2K7,BMP2,DVL1,LRP6,WNT2B,MAPK12,TCF3,APC,TRADD,IKBKB,CALM1 (includes others),MAPK14,CASP9,FOXO1,LEF1,PIK3R2,ALPL
Actin Nucleation by ARP-WASP Complex	0.282	0.0893	PPP1R12C,RHOB,RHOD,SOS2,NCK1
Superpathway of Inositol Phosphate Compounds	0.279	0.0857	PPP1R12C,INPP5E,PPP2R5D,EPHX2,NUDT12,INPPL1,PPP2R5A,CDC25B,MTMR4,TMEM55A,PPP1R7,INPP5K,PIK3R2,ALPL,THTPA
D-myo-inositol-5-phosphate Metabolism	0.275	0.0859	CDC25B,MTMR4,PPP1R12C,TMEM55A,PPP1R7,PPP2R5D,EPHX2,NUDT12,ALPL,THTPA,PPP2R5A
Myc Mediated Apoptosis Signaling	0.268	0.0877	FADD,CASP9,SOS2,PIK3R2,MAPK12
PEDF Signaling	0.268	0.087	IKBKB,MAPK14,MAPK13,PIK3R2,MAPK12,MAPK11
Role of Oct4 in Mammalian Embryonic Stem Cell Pluripotency	0.268	0.0889	FAM208A,CASP6,NR2F6,WWP2
Dermatan Sulfate Biosynthesis	0.268	0.0889	B3GALT6,CHST10,NDST2,CHST15
Renin-Angiotensin Signaling	0.267	0.0857	PAK1,MAPK14,SOS2,PRKAR1B,MAPK13,PIK3R2,MAPK12,ADCY7,MAPK11
Dermatan Sulfate Biosynthesis (Late Stages)	0.267	0.0909	CHST10,NDST2,CHST15
Assembly of RNA Polymerase I Complex	0.259	0.111	UBTF
Prostanoid Biosynthesis	0.259	0.111	PTGES2
Glycogen Degradation II	0.259	0.111	PYGL
Methylglyoxal Degradation III	0.259	0.111	FAM213B
Folate Transformations I	0.259	0.111	MTR
Amyotrophic Lateral Sclerosis Signaling	0.258	0.0851	CAPN5,CCS,PAK1,CASP9,VEGFB,PIK3R2,RAB5B,ALS2
Heparan Sulfate Biosynthesis	0.254	0.087	B3GALT6,CHST10,NDST2,CHST15
Polyamine Regulation in Colon Cancer	0.245	0.0909	SAT2,APC
Cell Cycle Regulation by BTG Family Proteins	0.236	0.0857	PPP2R5D,CDK4,PPP2R5A
Embryonic Stem Cell Differentiation into Cardiac Lineages	0.23	0.1	ISL1
NAD biosynthesis II (from tryptophan)	0.23	0.1	NMNAT1
Glutathione-mediated Detoxification	0.227	0.087	GSTZ1,GSTM4
TCA Cycle II (Eukaryotic)	0.227	0.087	SDHA,ACO1
Glycogen Degradation III	0.205	0.0909	PYGL

## Sheet: cluster_5
Ingenuity Canonical Pathways	-log(p-value)	Ratio	Molecules
Protein Ubiquitination Pathway	12.3	0.184	USP14,HSPA14,DNAJC6,HLA-B,UBE2V2,DNAJC3,HSPA5,HSP90B1,HSP90AB1,PSMC6,UCHL5,SUGT1,PSMA3,PSMD14,PSMA2,PSMC2,PSMB4,UCHL3,PSMA6,USP15,PSMD13,USP38,HSPA9,PSMC4,PSMD6,DNAJC1,PSMA1,PSMD3,USP1,HSPA8,PSMB7,DNAJC24,HSCB,CUL2,PSMB2,PSMD2,DNAJB11,PSMD12,UBR1,HSPA13,PSMA4,HSP90AA1,PSMD1,HSPB7,UBE2E1
NRF2-mediated Oxidative Stress Response	4.18	0.134	USP14,PIK3C2A,PRDX1,DNAJC6,MAPK8,DNAJC3,DNAJC1,MAFK,MAFF,MAFG,FOS,HMOX1,STIP1,PRKCD,DNAJB11,VCP,UBE2K,CCT7,DNAJA2,MAP2K3,GCLM,MAP2K1,EIF2AK3
Aldosterone Signaling in Epithelial Cells	4.12	0.143	PIK3C2A,HSPA14,PDIA3,DNAJC6,HSPA9,DNAJC3,DNAJC1,HSPA5,HSPA8,PIP5K1A,DNAJC24,HSP90B1,HSP90AB1,HSCB,PRKCD,DNAJB11,HSPA13,HSP90AA1,HSPB7,MAP2K1
Unfolded protein response	4.02	0.212	HSPA8,HSP90B1,HSPA14,HSPA9,VCP,MAPK8,DNAJC3,DNAJA2,HSPA5,EIF2AK3,EIF2A
RAN Signaling	3.88	0.375	KPNA5,KPNA4,KPNA2,RAN,XPO1,KPNA1
Endoplasmic Reticulum Stress Pathway	3.15	0.286	HSP90B1,MAPK8,DNAJC3,EIF2S1,HSPA5,EIF2AK3
Oxidative Phosphorylation	2.88	0.137	ATP5J,COX7B,SDHB,NDUFA9,COX10,NDUFB5,ATP5L,NDUFB3,NDUFV2,NDUFAB1,COX5A,NDUFB6,CYB5A,ATP5G3
Mitochondrial Dysfunction	2.85	0.117	ATP5J,NDUFAF1,SDHB,COX7B,NDUFA9,COX10,NDUFB5,ATP5L,MAPK8,VDAC3,NDUFB3,VDAC2,NDUFV2,NDUFAB1,COX5A,NDUFB6,CYB5A,OGDH,ATP5G3
UDP-N-acetyl-D-glucosamine Biosynthesis II	2.82	0.6	GNPNAT1,GFPT1,GFPT2
Glucocorticoid Receptor Signaling	2.54	0.0996	HSPA14,GTF2F2,TAF7,HSPA5,GTF2A2,HSP90B1,POLR2C,HSP90AB1,PPP3R1,POLR2H,CHUK,NFKBIB,TAF2,MAP2K1,PIK3C2A,TAF5L,CDK7,HSPA9,MAPK8,POLR2K,PPP3CC,HSPA8,FOS,NFATC2,HSP90AA1
Estrogen Receptor Signaling	2.5	0.121	CCNC,GTF2F2,CDK7,TAF5L,POLR2K,TAF7,MED6,POLR2C,CDK8,MED17,MED10,MED31,POLR2H,TAF2,MAP2K1
Regulation of eIF4 and p70S6K Signaling	2.38	0.114	PIK3C2A,EIF3J,AGO2,RPS21,PAIP2,EIF2S1,EIF2B2,EIF2A,RPS4X,RPS6,EIF4A3,PPM1J,RPS25,RPS3,MAP2K1,EIF1AY
Assembly of RNA Polymerase II Complex	2.38	0.167	GTF2A2,POLR2C,TAF5L,CDK7,POLR2H,POLR2K,TAF7,TAF2
EIF2 Signaling	2.36	0.108	RPL11,PIK3C2A,RPL30,EIF3J,AGO2,RPS21,EIF2S1,EIF2B2,RPS4X,EIF2A,RPS6,RPL14,EIF4A3,RPS25,RPS3,MAP2K1,EIF2AK3,RPL38
Phosphatidylethanolamine Biosynthesis II	2.13	0.375	EPT1,CHKA,ETNK1
Regulation of IL-2 Expression in Activated and Anergic T Lymphocytes	2.08	0.132	FOS,PPP3R1,MAPK8,TOB1,NFATC2,PPP3CC,CHUK,NFKB2,NFKBIB,MAP2K1
Prostate Cancer Signaling	1.97	0.127	RB1,HSP90B1,PIK3C2A,HSP90AB1,HSP90AA1,CHUK,NFKB2,NFKBIB,MAP2K1,CDK2
p53 Signaling	1.8	0.115	RB1,PIK3C2A,TOPBP1,SIRT1,MAPK8,GNL3,TNFRSF10A,CHEK2,TP53BP2,CDK2,CHEK1
April Mediated Signaling	1.79	0.158	FOS,MAPK8,NFATC2,CHUK,NFKB2,NFKBIB
LPS-stimulated MAPK Signaling	1.79	0.125	FOS,PIK3C2A,PRKCD,MAPK8,MAP2K3,CHUK,NFKB2,NFKBIB,MAP2K1
TNFR2 Signaling	1.78	0.179	FOS,MAPK8,CHUK,NFKB2,NFKBIB
RANK Signaling in Osteoclasts	1.76	0.118	FOS,PIK3C2A,PPP3R1,MAPK8,NFATC2,PPP3CC,CHUK,NFKB2,NFKBIB,MAP2K1
Mitotic Roles of Polo-Like Kinase	1.71	0.129	HSP90B1,HSP90AB1,PLK3,PPM1J,PTTG1,HSP90AA1,CHEK2,CCNB1
CD27 Signaling in Lymphocytes	1.69	0.137	FOS,MAPK8,MAP2K3,CHUK,NFKB2,NFKBIB,MAP2K1
B Cell Activating Factor Signaling	1.68	0.15	FOS,MAPK8,NFATC2,CHUK,NFKB2,NFKBIB
CD40 Signaling	1.68	0.127	FOS,PIK3C2A,MAPK8,MAP2K3,CHUK,NFKB2,NFKBIB,MAP2K1
Cell Cycle: G1/S Checkpoint Regulation	1.68	0.127	RPL11,RB1,E2F6,CCND3,PAK1IP1,E2F5,GNL3,CDK2
4-1BB Signaling in T Lymphocytes	1.6	0.161	MAPK8,CHUK,NFKB2,NFKBIB,MAP2K1
IL-10 Signaling	1.57	0.121	HMOX1,SOCS3,FOS,MAPK8,MAP2K3,CHUK,NFKB2,NFKBIB
Role of CHK Proteins in Cell Cycle Checkpoint Control	1.53	0.127	E2F6,RAD9A,PPM1J,E2F5,CHEK2,CDK2,CHEK1
Polyamine Regulation in Colon Cancer	1.53	0.182	AZIN1,MXD1,SAT1,PSME4
Telomerase Signaling	1.48	0.106	RB1,HSP90B1,PIK3C2A,HSP90AB1,ETS2,PPM1J,DKC1,TERF2IP,HSP90AA1,MAP2K1
CD28 Signaling in T Helper Cells	1.46	0.102	FOS,PIK3C2A,ARPC5L,PPP3R1,MAPK8,NFATC2,PPP3CC,CHUK,NFKB2,NFKBIB,MAP2K1
TCA Cycle II (Eukaryotic)	1.46	0.174	SDHB,IDH3A,MDH1,OGDH
Estrogen-mediated S-phase Entry	1.4	0.167	RB1,E2F6,E2F5,CDK2
Gluconeogenesis I	1.4	0.167	PGK1,ME2,MDH1,BPGM
Cell Cycle Regulation by BTG Family Proteins	1.39	0.143	RB1,E2F6,PPM1J,E2F5,CDK2
Toll-like Receptor Signaling	1.37	0.111	TLR2,FOS,TICAM1,MAPK8,MAP2K3,CHUK,NFKB2,IRAK2
Role of BRCA1 in DNA Damage Response	1.35	0.117	RB1,E2F6,TOPBP1,E2F5,RBBP8,CHEK2,CHEK1
Cell Cycle: G2/M DNA Damage Checkpoint Regulation	1.3	0.122	YWHAQ,CDK7,BORA,CHEK2,CHEK1,CCNB1
Pyridoxal 5'-phosphate Salvage Pathway	1.28	0.113	CDK8,PRKCD,CDK7,MAPK8,MAP2K3,MAP2K1,CDK2
Phosphatidylcholine Biosynthesis I	1.28	0.286	CHKA,PHKA1
Glutamine Biosynthesis I	1.26	1	GLUL
Sorbitol Degradation I	1.26	1	SORD
Cyclins and Cell Cycle Regulation	1.23	0.104	RB1,E2F6,CCND3,PPM1J,CDK7,E2F5,CDK2,CCNB1
T Cell Receptor Signaling	1.21	0.0989	FOS,PIK3C2A,PPP3R1,MAPK8,NFATC2,PPP3CC,CHUK,NFKB2,MAP2K1
Role of IL-17A in Arthritis	1.2	0.115	PIK3C2A,MAPK8,MAP2K3,NFKB2,NFKBIB,MAP2K1
Aryl Hydrocarbon Receptor Signaling	1.2	0.0896	RB1,FOS,HSP90B1,CCND3,HSP90AB1,MAPK8,HSP90AA1,HSPB7,NFKB2,CHEK2,CDK2,CHEK1
Erythropoietin Signaling	1.19	0.108	SOCS3,FOS,PIK3C2A,PRKCD,NFKB2,NFKBIB,MAP2K1
Remodeling of Epithelial Adherens Junctions	1.19	0.108	TUBB3,RAB5A,ARPC5L,TUBB4B,MAPRE1,TUBA1C,DNM1L
Neurotrophin/TRK Signaling	1.19	0.108	FOS,NTRK2,PIK3C2A,SPRY2,MAPK8,MAP2K3,MAP2K1
Role of PKR in Interferon Induction and Antiviral Response	1.18	0.125	MAP2K3,CHUK,NFKB2,EIF2S1,NFKBIB
IL-12 Signaling and Production in Macrophages	1.13	0.0894	TLR2,JMJD6,FOS,PIK3C2A,PRKCD,MAPK8,CHUK,NFKB2,REL,NFKBIB,MAP2K1
Type II Diabetes Mellitus Signaling	1.12	0.0917	SOCS3,PIK3C2A,PRKCD,MAPK8,CHUK,NFKB2,ADIPOR2,NFKBIB,ADIPOR1,ACSL1
GADD45 Signaling	1.08	0.158	CCND3,CDK2,CCNB1
DNA damage-induced 14-3-3ìÄ Signaling	1.08	0.158	RAD9A,CDK2,CCNB1
14-3-3-mediated Signaling	1.08	0.0901	YWHAQ,FOS,TUBB3,PIK3C2A,TUBB4B,PDIA3,PRKCD,MAPK8,TUBA1C,MAP2K1
Assembly of RNA Polymerase I Complex	1.08	0.222	TAF1A,POLR1B
iNOS Signaling	1.07	0.116	FOS,CHUK,NFKB2,NFKBIB,IRAK2
Huntington's Disease Signaling	1.07	0.0787	ATP5J,SDHB,PIK3C2A,HSPA14,HSPA9,MAPK8,RCOR1,POLR2K,HSPA5,HSPA8,POLR2C,PRKCD,PENK,TCERG1,POLR2H,PSME4,DNM1L
DNA Methylation and Transcriptional Repression Signaling	1.03	0.15	SAP18,SAP130,DNMT1
PI3K Signaling in B Lymphocytes	1	0.087	FOS,PDIA3,PPP3R1,LYN,NFATC2,PPP3CC,CHUK,NFKB2,NFKBIB,MAP2K1
IL-6 Signaling	1	0.087	SOCS3,FOS,PIK3C2A,MAPK8,HSPB7,MAP2K3,CHUK,NFKB2,NFKBIB,MAP2K1
Induction of Apoptosis by HIV1	0.988	0.102	SLC25A13,MAPK8,CHUK,NFKB2,NFKBIB,SLC25A5
ATM Signaling	0.988	0.102	RAD9A,MAPK8,CHEK2,CDK2,CHEK1,CCNB1
TWEAK Signaling	0.982	0.121	CHUK,NFKB2,NFKBIB,TNFRSF12A
Guanine and Guanosine Salvage I	0.972	0.5	HPRT1
Spermine Biosynthesis	0.972	0.5	AMD1
All-trans-decaprenyl Diphosphate Biosynthesis	0.972	0.5	PDSS1
Taurine Biosynthesis	0.972	0.5	CDO1
Flavin Biosynthesis IV (Mammalian)	0.972	0.5	RFK
TNFR1 Signaling	0.947	0.106	FOS,MAPK8,CHUK,NFKB2,NFKBIB
Nucleotide Excision Repair Pathway	0.946	0.118	POLR2C,CDK7,POLR2H,POLR2K
PPAR Signaling	0.923	0.0889	FOS,HSP90B1,HSP90AB1,HSP90AA1,CHUK,NFKB2,NFKBIB,MAP2K1
fMLP Signaling in Neutrophils	0.916	0.0857	PIK3C2A,ARPC5L,PRKCD,PPP3R1,NFATC2,PPP3CC,NFKB2,NFKBIB,MAP2K1
Pancreatic Adenocarcinoma Signaling	0.916	0.0857	HMOX1,RB1,E2F6,PIK3C2A,E2F5,MAPK8,NFKB2,MAP2K1,CDK2
IL-17A Signaling in Fibroblasts	0.912	0.114	FOS,CHUK,NFKB2,NFKBIB
IL-17A Signaling in Airway Cells	0.911	0.0968	PIK3C2A,MAPK8,CHUK,NFKB2,NFKBIB,MAP2K1
IL-1 Signaling	0.903	0.0879	FOS,MAPK8,MAP2K3,CHUK,GNA13,NFKB2,NFKBIB,IRAK2
Glycolysis I	0.89	0.13	PGK1,PFKP,BPGM
Hypoxia Signaling in the Cardiovascular System	0.887	0.0952	HSP90B1,HSP90AB1,HSP90AA1,UBE2V2,NFKBIB,UBE2E1
Cleavage and Polyadenylation of Pre-mRNA	0.862	0.167	CSTF2,CSTF3
Netrin Signaling	0.847	0.108	PPP3R1,NFATC2,PPP3CC,NTN1
PKCëü Signaling in T Lymphocytes	0.845	0.0826	FOS,PIK3C2A,PPP3R1,MAPK8,NFATC2,PPP3CC,CHUK,NFKB2,NFKBIB
UVB-Induced MAPK Signaling	0.837	0.098	FOS,PIK3C2A,PRKCD,MAPK8,MAP2K1
Androgen Signaling	0.828	0.0818	POLR2C,PRKCD,CDK7,HSP90AA1,POLR2H,POLR2K,GNA13,NFKB2,TAF2
3-phosphoinositide Biosynthesis	0.822	0.078	WBP11,SOCS3,PIP5K1A,MTMR9,PTPN2,PIK3C2A,DOT1L,PTPN1,ACP1,RNGTT,NUDT15
PRPP Biosynthesis I	0.808	0.333	PRPS1
Methylglyoxal Degradation I	0.808	0.333	GLO1
1,25-dihydroxyvitamin D3 Biosynthesis	0.808	0.333	POR
Glutathione Biosynthesis	0.808	0.333	GCLM
Tetrahydrobiopterin Biosynthesis I	0.808	0.333	PTS
Hypusine Biosynthesis	0.808	0.333	DOHH
Spermidine Biosynthesis I	0.808	0.333	AMD1
Tetrahydrobiopterin Biosynthesis II	0.808	0.333	PTS
Gë±q Signaling	0.808	0.0775	HMOX1,PIK3C2A,PRKCD,PPP3R1,NFATC2,PPP3CC,CHUK,NFKB2,NFKBIB,MAP2K1,ADRA1D
Choline Biosynthesis III	0.804	0.154	HMOX1,PHKA1
Role of NFAT in Regulation of the Immune Response	0.775	0.075	FOS,PIK3C2A,PPP3R1,LYN,NFATC2,XPO1,PPP3CC,CHUK,GNA13,NFKB2,NFKBIB,MAP2K1
Antiproliferative Role of TOB in T Cell Signaling	0.774	0.115	RB1,TOB1,CDK2
Cell Cycle Control of Chromosomal Replication	0.774	0.115	CDK7,CHEK2,CDK2
PPARë±/RXRë± Activation	0.762	0.0745	HSP90B1,HSP90AB1,PDIA3,MAPK8,HSP90AA1,MAP2K3,CHUK,NFKB2,ADIPOR2,NFKBIB,MAP2K1,ADIPOR1
Systemic Lupus Erythematosus Signaling	0.761	0.0725	PPIH,PIK3C2A,SNRPB,PRPF3,SNRNP27,SNRPF,HLA-B,PRPF4,FOS,SNRPB2,LYN,NFATC2,HNRNPC,LSM5
MIF Regulation of Innate Immunity	0.759	0.1	FOS,MAPK8,NFKB2,NFKBIB
DNA Double-Strand Break Repair by Non-Homologous End Joining	0.753	0.143	LIG4,XRCC4
ë_-glutamyl Cycle	0.753	0.143	GGCT,GCLM
D-myo-inositol (1,4,5,6)-Tetrakisphosphate Biosynthesis	0.748	0.0783	WBP11,SOCS3,MTMR9,PTPN2,DOT1L,PTPN1,ACP1,RNGTT,NUDT15
D-myo-inositol (3,4,5,6)-tetrakisphosphate Biosynthesis	0.748	0.0783	WBP11,SOCS3,MTMR9,PTPN2,DOT1L,PTPN1,ACP1,RNGTT,NUDT15
Neuregulin Signaling	0.736	0.0824	RPS6,HSP90B1,HSP90AB1,PRKCD,HSP90AA1,ERRFI1,MAP2K1
IL-3 Signaling	0.735	0.0857	FOS,PIK3C2A,PRKCD,PPP3R1,PPP3CC,MAP2K1
Prolactin Signaling	0.735	0.0857	SOCS3,FOS,PIK3C2A,PRKCD,TCF7,MAP2K1
Small Cell Lung Cancer Signaling	0.735	0.0857	RB1,PIK3C2A,CHUK,NFKB2,NFKBIB,CDK2
JAK/Stat Signaling	0.735	0.0857	SOCS3,FOS,PIK3C2A,PTPN1,NFKB2,MAP2K1
UVC-Induced MAPK Signaling	0.707	0.0952	FOS,PRKCD,MAPK8,MAP2K1
CDP-diacylglycerol Biosynthesis I	0.706	0.133	AGPAT5,ABHD5
Superpathway of Geranylgeranyldiphosphate Biosynthesis I (via Mevalonate)	0.706	0.133	IDI1,COX10
Salvage Pathways of Pyrimidine Ribonucleotides	0.701	0.0805	CDK8,PRKCD,CDK7,MAPK8,MAP2K3,MAP2K1,CDK2
2-ketoglutarate Dehydrogenase Complex	0.695	0.25	OGDH
Heme Degradation	0.695	0.25	HMOX1
Spermine and Spermidine Degradation I	0.695	0.25	SAT1
Geranylgeranyldiphosphate Biosynthesis	0.695	0.25	COX10
Arginine Degradation I (Arginase Pathway)	0.695	0.25	OAT
Trans, trans-farnesyl Diphosphate Biosynthesis	0.695	0.25	IDI1
Rapoport-Luebering Glycolytic Shunt	0.695	0.25	BPGM
L-cysteine Degradation I	0.695	0.25	CDO1
Molybdenum Cofactor Biosynthesis	0.695	0.25	MOCS2
Acetate Conversion to Acetyl-CoA	0.695	0.25	ACSL1
PI3K/AKT Signaling	0.689	0.0756	YWHAQ,HSP90B1,HSP90AB1,PPM1J,HSP90AA1,CHUK,NFKB2,NFKBIB,MAP2K1
Antioxidant Action of Vitamin C	0.668	0.0787	PNPLA8,HMOX1,PDIA3,MAPK8,CHUK,NFKB2,NFKBIB
Death Receptor Signaling	0.652	0.0778	TIPARP,MAPK8,HSPB7,CHUK,NFKB2,NFKBIB,TNFRSF10A
Chronic Myeloid Leukemia Signaling	0.637	0.0769	RB1,E2F6,PIK3C2A,E2F5,CHUK,NFKB2,MAP2K1
Role of Oct4 in Mammalian Embryonic Stem Cell Pluripotency	0.636	0.0889	RB1,PHB,ETS2,JARID2
ë_-linolenate Biosynthesis II (Animals)	0.623	0.118	CYB5A,ACSL1
Phosphatidylglycerol Biosynthesis II (Non-plastidic)	0.623	0.118	AGPAT5,ABHD5
Fcë_ Receptor-mediated Phagocytosis in Macrophages and Monocytes	0.622	0.0761	HMOX1,PIP5K1A,ARPC5L,PRKCD,EZR,LYN,RAB11A
GM-CSF Signaling	0.618	0.082	PIK3C2A,PPP3R1,LYN,PPP3CC,MAP2K1
Tetrahydrofolate Salvage from 5,10-methenyltetrahydrofolate	0.61	0.2	MTHFD2L
Tetrapyrrole Biosynthesis II	0.61	0.2	ALAS1
CMP-N-acetylneuraminate Biosynthesis I (Eukaryotes)	0.61	0.2	NANS
Adenine and Adenosine Salvage III	0.61	0.2	HPRT1
Purine Ribonucleosides Degradation to Ribose-1-phosphate	0.61	0.2	PGM2
Hereditary Breast Cancer Signaling	0.607	0.0734	RB1,POLR2C,PIK3C2A,POLR2H,POLR2K,CHEK2,CHEK1,CCNB1
Ceramide Signaling	0.594	0.0769	FOS,PIK3C2A,PPM1J,MAPK8,NFKB2,MAP2K1
OX40 Signaling Pathway	0.572	0.0833	HLA-B,MAPK8,NFKB2,NFKBIB
D-myo-inositol-5-phosphate Metabolism	0.572	0.0703	WBP11,SOCS3,MTMR9,PTPN2,DOT1L,PTPN1,ACP1,RNGTT,NUDT15
IL-9 Signaling	0.569	0.0909	SOCS3,PIK3C2A,NFKB2
p70S6K Signaling	0.555	0.0708	YWHAQ,RPS6,PIK3C2A,PDIA3,PPM1J,PRKCD,LYN,MAP2K1
UVA-Induced MAPK Signaling	0.548	0.0741	FOS,RPS6KA6,TIPARP,PIK3C2A,PDIA3,MAPK8
Arginine Biosynthesis IV	0.542	0.167	OAT
Proline Biosynthesis II (from Arginine)	0.542	0.167	OAT
Chondroitin and Dermatan Biosynthesis	0.542	0.167	CSGALNACT2
Arginine Degradation VI (Arginase 2 Pathway)	0.542	0.167	OAT
Histidine Degradation III	0.542	0.167	MTHFD2L
Acetyl-CoA Biosynthesis I (Pyruvate Dehydrogenase Complex)	0.542	0.167	DLAT
GDP-glucose Biosynthesis	0.542	0.167	PGM2
GDP-mannose Biosynthesis	0.542	0.167	PMM2
mTOR Signaling	0.539	0.0663	RPS6,HMOX1,RPS6KA6,PIK3C2A,EIF4A3,PPM1J,PRKCD,EIF3J,RPS25,RPS21,RPS3,RPS4X
Molecular Mechanisms of Cancer	0.536	0.0625	PIK3C2A,HAT1,CDK7,WNT9A,MAPK8,NFKB2,CHEK1,FOS,RB1,E2F6,LAMTOR3,RABIF,CCND3,PRKCD,E2F5,MAP2K3,GNA13,NFKBIB,MAP2K1,CHEK2,BCL2L11,CDK2
Growth Hormone Signaling	0.532	0.0758	SOCS3,FOS,RPS6KA6,PIK3C2A,PRKCD
GDNF Family Ligand-Receptor Interactions	0.532	0.0758	FOS,PIK3C2A,MAPK8,RET,MAP2K1
ERK/MAPK Signaling	0.53	0.0659	YWHAQ,PPP1R14C,FOS,LAMTOR3,PIK3C2A,ETS2,VRK2,PPM1J,PRKCD,MAPKAPK5,HSPB7,MAP2K1
eNOS Signaling	0.526	0.0682	HSPA8,HSP90B1,HSPA14,PIK3C2A,HSP90AB1,PRKCD,HSPA9,HSP90AA1,HSPA5
3-phosphoinositide Degradation	0.526	0.0682	WBP11,SOCS3,MTMR9,PTPN2,DOT1L,PTPN1,ACP1,RNGTT,NUDT15
iCOS-iCOSL Signaling in T Helper Cells	0.525	0.0707	PIK3C2A,PPP3R1,NFATC2,PPP3CC,CHUK,NFKB2,NFKBIB
ErbB Signaling	0.519	0.0723	FOS,PIK3C2A,PRKCD,MAPK8,MAP2K3,MAP2K1
Cholecystokinin/Gastrin-mediated Signaling	0.512	0.07	FOS,PRKCD,MAPK8,MAP2K3,EPHA4,GNA13,MAP2K1
B Cell Receptor Signaling	0.512	0.0659	PIK3C2A,PPP3R1,MAPK8,LYN,NFATC2,MAP2K3,PPP3CC,CHUK,NFKB2,NFKBIB,MAP2K1
Role of RIG1-like Receptors in Antiviral Innate Immunity	0.501	0.0833	CHUK,NFKB2,NFKBIB
IL-2 Signaling	0.498	0.0769	FOS,PIK3C2A,MAPK8,MAP2K1
HGF Signaling	0.488	0.0686	FOS,PIK3C2A,ETS2,PRKCD,MAPK8,MAP2K1,CDK2
Sphingosine and Sphingosine-1-phosphate Metabolism	0.487	0.143	SGPP1
Glucose and Glucose-1-phosphate Degradation	0.487	0.143	PGM2
Citrulline Biosynthesis	0.487	0.143	OAT
Ketolysis	0.487	0.143	OXCT1
Aspartate Degradation II	0.487	0.143	MDH1
PEDF Signaling	0.486	0.0725	PIK3C2A,CHUK,NFKB2,NFKBIB,TCF7
Thrombopoietin Signaling	0.481	0.0755	FOS,PIK3C2A,PRKCD,MAP2K1
Apoptosis Signaling	0.479	0.0698	MAPK8,CHUK,NFKB2,NFKBIB,MAP2K1,BCL2L11
Type I Diabetes Mellitus Signaling	0.476	0.068	SOCS3,HLA-B,MAPK8,MAP2K3,CHUK,NFKB2,NFKBIB
Breast Cancer Regulation by Stathmin1	0.476	0.0638	PPP1R14C,E2F6,TUBB3,PIK3C2A,TUBB4B,PPM1J,PRKCD,E2F5,TUBA1C,GNA13,MAP2K1,CDK2
Role of JAK1, JAK2 and TYK2 in Interferon Signaling	0.467	0.0909	PTPN2,NFKB2
Activation of IRF by Cytosolic Pattern Recognition Receptors	0.465	0.0741	MAPK8,CHUK,NFKB2,NFKBIB
Role of PI3K/AKT Signaling in the Pathogenesis of Influenza	0.465	0.0741	PIK3C2A,NFKB2,NFKBIB,MAP2K1
EGF Signaling	0.465	0.0741	FOS,PIK3C2A,MAPK8,MAP2K1
NGF Signaling	0.464	0.0673	RPS6KA6,PIK3C2A,PRKCD,MAPK8,CHUK,NFKB2,MAP2K1
STAT3 Pathway	0.458	0.0704	SOCS3,NTRK2,PTPN2,MAPK8,MAP2K1
Glioblastoma Multiforme Signaling	0.454	0.0647	RB1,E2F6,PIK3C2A,PDIA3,PRKCD,WNT9A,E2F5,MAP2K1,CDK2
NF-ë¼B Activation by Viruses	0.444	0.0694	PIK3C2A,PRKCD,CHUK,NFKB2,NFKBIB
Thyroid Cancer Signaling	0.442	0.0769	NTRK2,RET,MAP2K1
Oleate Biosynthesis II (Animals)	0.44	0.125	CYB5A
Clathrin-mediated Endocytosis Signaling	0.44	0.0629	HSPA8,CD2AP,RAB5A,PIK3C2A,EPHB2,ARPC5L,PICALM,PPP3R1,RAB11A,PPP3CC,DNM1L
Production of Nitric Oxide and Reactive Oxygen Species in Macrophages	0.44	0.0629	TLR2,PPP1R14C,FOS,PIK3C2A,PPM1J,PRKCD,MAPK8,CHUK,NFKB2,NFKBIB,MAP2K1
Superpathway of Inositol Phosphate Compounds	0.44	0.0629	WBP11,SOCS3,PIP5K1A,MTMR9,PTPN2,PIK3C2A,DOT1L,PTPN1,ACP1,RNGTT,NUDT15
Calcium-induced T Lymphocyte Apoptosis	0.434	0.0714	PRKCD,PPP3R1,NFATC2,PPP3CC
Acute Phase Response Signaling	0.429	0.0629	HMOX1,SOCS3,FOS,MAPK8,MAP2K3,CHUK,NFKB2,NFKBIB,NOLC1,MAP2K1
Fcë_RIIB Signaling in B Lymphocytes	0.425	0.075	PIK3C2A,MAPK8,LYN
Mechanisms of Viral Exit from Host Cells	0.425	0.075	CHMP2B,PRKCD,XPO1
Role of IL-17F in Allergic Inflammatory Airway Diseases	0.425	0.075	RPS6KA6,NFKB2,MAP2K1
IL-22 Signaling	0.419	0.0833	SOCS3,MAPK8
PDGF Signaling	0.418	0.0676	FOS,PIK3C2A,MAPK8,ACP1,MAP2K1
Glioma Signaling	0.408	0.0652	RB1,E2F6,PIK3C2A,PRKCD,E2F5,MAP2K1
Melanoma Signaling	0.407	0.0732	RB1,PIK3C2A,MAP2K1
Glycogen Degradation II	0.4	0.111	PGM2
Leucine Degradation I	0.4	0.111	ACADM
Heme Biosynthesis II	0.4	0.111	ALAS1
UDP-N-acetyl-D-galactosamine Biosynthesis II	0.4	0.111	GNPNAT1
Folate Transformations I	0.4	0.111	MTHFD2L
IL-8 Signaling	0.4	0.0611	HMOX1,FOS,CCND3,PIK3C2A,PRKCD,MAPK8,CHUK,GNA13,NFKBIB,MAP2K1,IRAK2
IL-17A Signaling in Gastric Cells	0.397	0.08	FOS,MAPK8
Role of JAK family kinases in IL-6-type Cytokine Signaling	0.397	0.08	SOCS3,MAPK8
Gap Junction Signaling	0.391	0.0616	TUBB3,PIK3C2A,TUBB4B,PDIA3,PRKCD,PPP3R1,TUBA1C,PPP3CC,MAP2K1
Nitric Oxide Signaling in the Cardiovascular System	0.386	0.0638	HSP90B1,PIK3C2A,HSP90AB1,PRKCD,HSP90AA1,MAP2K1
Gë±12/13 Signaling	0.381	0.0625	PIK3C2A,MAPK8,CHUK,GNA13,NFKB2,NFKBIB,MAP2K1
IGF-1 Signaling	0.376	0.0632	YWHAQ,SOCS3,FOS,PIK3C2A,MAPK8,MAP2K1
Role of Pattern Recognition Receptors in Recognition of Bacteria and Viruses	0.372	0.0619	TLR2,PIK3C2A,TICAM1,PRKCD,MAPK8,NFKB2,EIF2S1
NAD Phosphorylation and Dephosphorylation	0.366	0.1	ACP1
Dolichyl-diphosphooligosaccharide Biosynthesis	0.366	0.1	ALG5
nNOS Signaling in Neurons	0.361	0.0682	PRKCD,PPP3R1,PPP3CC
Role of p14/p19ARF in Tumor Suppression	0.357	0.0741	RB1,PIK3C2A
ERK5 Signaling	0.341	0.0635	YWHAQ,FOS,RPS6KA6,GNA13
Fatty Acid ë_-oxidation I	0.339	0.0714	ACADM,ACSL1
HMGB1 Signaling	0.336	0.0598	FOS,PIK3C2A,HAT1,MAPK8,MAP2K3,NFKB2,MAP2K1
Dendritic Cell Maturation	0.335	0.0588	TLR2,PIK3C2A,PDIA3,HLA-B,MAPK8,CD58,CHUK,NFKB2,NFKBIB
Acyl-CoA Hydrolysis	0.335	0.0909	ACOT7
Glycogen Degradation III	0.335	0.0909	PGM2
Mevalonate Pathway I	0.335	0.0909	IDI1
Purine Nucleotides De Novo Biosynthesis II	0.335	0.0909	ADSS
Ephrin A Signaling	0.333	0.0652	PIK3C2A,EPHA4,EPHA2
Melatonin Signaling	0.33	0.0625	PDIA3,PRKCD,MAP2K3,MAP2K1
Angiopoietin Signaling	0.33	0.0625	PIK3C2A,CHUK,NFKB2,NFKBIB
Protein Kinase A Signaling	0.327	0.0567	PPP1R14C,PTPRE,PTPN2,PDIA3,TIMM50,ACP1,NFKB2,PPP3CC,PTPDC1,NTN1,PDE8A,YWHAQ,PRKCD,PPP3R1,PTPN1,NFATC2,CHUK,GNA13,NFKBIB,MAP2K1
Role of MAPK Signaling in the Pathogenesis of Influenza	0.319	0.0615	PNPLA8,MAPK8,MAP2K3,MAP2K1
Rac Signaling	0.311	0.0588	PIP5K1A,PIK3C2A,ARPC5L,MAPK8,NFKB2,MAP2K1
CNTF Signaling	0.307	0.0625	RPS6KA6,PIK3C2A,MAP2K1
Role of JAK2 in Hormone-like Cytokine Signaling	0.306	0.0667	SOCS3,PTPN1
Renal Cell Carcinoma Signaling	0.298	0.0597	FOS,PIK3C2A,CUL2,MAP2K1
Adipogenesis pathway	0.297	0.0574	SAP18,DGKD,CDK7,SIRT1,SAP130,SOX9,TCF7
Phospholipases	0.295	0.0612	PNPLA8,HMOX1,PDIA3
Fc Epsilon RI Signaling	0.294	0.0577	PIK3C2A,PRKCD,MAPK8,LYN,MAP2K3,MAP2K1
Neuropathic Pain Signaling In Dorsal Horn Neurons	0.291	0.0581	FOS,NTRK2,PIK3C2A,PDIA3,PRKCD
TGF-ë_ Signaling	0.291	0.0581	FOS,MAPK8,MAP2K3,MAP2K1,PMEPA1
Triacylglycerol Biosynthesis	0.29	0.0645	AGPAT5,ABHD5
Leptin Signaling in Obesity	0.288	0.0588	SOCS3,PIK3C2A,PDIA3,MAP2K1
Renin-Angiotensin Signaling	0.286	0.0571	FOS,PIK3C2A,PRKCD,MAPK8,NFKB2,MAP2K1
Fatty Acid Activation	0.285	0.0769	ACSL1
Superpathway of Citrulline Metabolism	0.285	0.0769	OAT
Wnt/Ca+ pathway	0.283	0.06	PDIA3,NFATC2,NFKB2
VEGF Signaling	0.283	0.0575	PIK3C2A,EIF2S1,MAP2K1,EIF2B2,EIF1AY
Synaptic Long Term Depression	0.282	0.0565	PNPLA8,PDIA3,PPM1J,PRKCD,LYN,GNA13,MAP2K1
Insulin Receptor Signaling	0.282	0.0565	PPP1R14C,SOCS3,PIK3C2A,PTPN1,MAPK8,MAP2K1,EIF2B2
Inhibition of Angiogenesis by TSP1	0.276	0.0625	CD47,MAPK8
MIF-mediated Glucocorticoid Regulation	0.276	0.0625	NFKB2,NFKBIB
Antigen Presentation Pathway	0.276	0.0625	PDIA3,HLA-B
Synaptic Long Term Potentiation	0.271	0.0561	PPP1R14C,PDIA3,PRKCD,PPP3R1,PPP3CC,MAP2K1
GNRH Signaling	0.268	0.0556	FOS,PRKCD,MAPK8,MAP2K3,NFKB2,DNM1L,MAP2K1
Telomere Extension by Telomerase	0.263	0.0714	TERF2IP
Colanic Acid Building Blocks Biosynthesis	0.263	0.0714	PMM2
Oxidative Ethanol Degradation III	0.263	0.0714	ACSL1
Parkinson's Signaling	0.263	0.0714	MAPK8
Relaxin Signaling	0.261	0.0551	PDE8A,FOS,PIK3C2A,GNA13,NFKB2,NFKBIB,MAP2K1
IL-17 Signaling	0.26	0.0563	PIK3C2A,MAPK8,MAP2K3,MAP2K1
Lymphotoxin ë_ Receptor Signaling	0.251	0.0566	PIK3C2A,CHUK,NFKB2
Stearate Biosynthesis I (Animals)	0.25	0.0588	ACOT7,ACSL1
VEGF Family Ligand-Receptor Interactions	0.243	0.0548	FOS,PIK3C2A,PRKCD,MAP2K1
Chondroitin Sulfate Biosynthesis (Late Stages)	0.226	0.0556	CSGALNACT2,CHST11
Putrescine Degradation III	0.226	0.0625	SAT1
Ethanol Degradation IV	0.226	0.0625	ACSL1
Mitochondrial L-carnitine Shuttle Pathway	0.21	0.0588	ACSL1
D-myo-inositol (1,4,5)-trisphosphate Degradation	0.21	0.0588	INPP1

## Sheet: cluster_6
Ingenuity Canonical Pathways	-log(p-value)	Ratio	Molecules
Basal Cell Carcinoma Signaling	4.91	0.149	TP53,DVL2,BMP4,GLI2,GLI3,GLIS1,FZD2,WNT11,TCF7L2,FZD7
Adipogenesis pathway	3.31	0.0902	TP53,RUNX1T1,BMP4,DDIT3,HDAC11,HDAC7,NR2F2,NFATC4,TBL1XR1,FZD2,FZD7
PCP pathway	2.89	0.115	ROR2,DVL2,JUND,PRICKLE1,FZD2,WNT11,FZD7
RhoA Signaling	2.82	0.084	PTK2B,CDC42EP5,ARHGAP35,ARHGAP12,PIP4K2B,RAPGEF6,CDC42EP3,CDC42EP1,PLD1,ARHGAP8/PRR5-ARHGAP8
Wnt/Î²-catenin Signaling	2.78	0.0736	SOX4,TP53,DVL2,RARA,SOX12,TLE4,RARG,FZD2,WNT11,TCF7L2,TAB1,FZD7
N-acetylglucosamine Degradation I	2.66	0.667	GNPDA1,AMDHD2
Aryl Hydrocarbon Receptor Signaling	2.44	0.0746	AHRR,NR2F1,TP53,HSPB2,RARA,CDKN1B,RXRA,RARG,AHR,CYP1B1
N-acetylglucosamine Degradation II	2.37	0.5	GNPDA1,AMDHD2
Sonic Hedgehog Signaling	2.13	0.138	DYRK1B,GLI2,GLI3,GLIS1
Circadian Rhythm Signaling	1.98	0.125	NR1D1,BHLHE41,CRY2,ATF4
Wnt/Ca+ pathway	1.95	0.1	DVL2,ATF4,NFATC4,FZD2,FZD7
Mouse Embryonic Stem Cell Pluripotency	1.9	0.0761	TP53,DVL2,BMP4,FZD2,TCF7L2,TAB1,FZD7
Retinoic acid Mediated Apoptosis Signaling	1.88	0.0962	PARP16,RARA,CASP8,RXRA,RARG
B Cell Receptor Signaling	1.8	0.0599	RAP2B,MAP3K12,BCL2L1,PTK2B,POU2F2,PAG1,MAP3K1,ATF4,NFATC4,CAMK2G
Molecular Mechanisms of Cancer	1.79	0.0483	TP53,RAP2B,BMP4,ARHGEF17,RASGRF2,BCL2L1,ADCY9,ARHGEF6,ARHGEF2,CDKN1B,CASP8,FZD2,WNT11,RALGDS,TAB1,CAMK2G,FZD7
Cyclins and Cell Cycle Regulation	1.74	0.0779	TP53,HDAC11,WEE1,HDAC7,CDKN1B,SKP2
Thyroid Cancer Signaling	1.68	0.103	TP53,BDNF,RXRA,TCF7L2
Phospholipase C Signaling	1.68	0.0531	ADCY9,NAPEPLD,HDAC11,HDAC7,ARHGEF6,GNG2,ATF4,ARHGEF17,ARHGEF2,NFATC4,PLD1,RALGDS
Cell Cycle: G1/S Checkpoint Regulation	1.55	0.0794	TP53,HDAC11,HDAC7,CDKN1B,SKP2
Role of Oct4 in Mammalian Embryonic Stem Cell Pluripotency	1.48	0.0889	NR2F1,TP53,RARA,NR2F2
Role of Wnt/GSK-3Î² Signaling in the Pathogenesis of Influenza	1.48	0.0758	DVL2,FZD2,WNT11,TCF7L2,FZD7
Small Cell Lung Cancer Signaling	1.38	0.0714	TP53,BCL2L1,CDKN1B,RXRA,SKP2
RAR Activation	1.37	0.0529	NR2F1,ADCY9,SMARCA2,RARA,MAP3K1,NR2F2,RXRA,RARG,CITED2
Signaling by Rho Family GTPases	1.36	0.0489	MAP3K12,PTK2B,CDC42EP5,ARHGEF6,GNG2,PIP4K2B,CDC42EP3,ARHGEF17,CDC42EP1,ARHGEF2,PLD1
Choline Biosynthesis III	1.33	0.154	NAPEPLD,PLD1
CD27 Signaling in Lymphocytes	1.31	0.0784	MAP3K12,BCL2L1,MAP3K1,CASP8
Regulation of the Epithelial-Mesenchymal Transition Pathway	1.28	0.0508	PYGO2,DVL2,SNAI2,TWIST1,PARD6G,FZD2,WNT11,TCF7L2,FZD7
S-methyl-5-thio-Î±-D-ribose 1-phosphate Degradation	1.27	0.5	MRI1
Formaldehyde Oxidation II (Glutathione-dependent)	1.27	0.5	ADH5
Glutamate Biosynthesis II	1.27	0.5	GLUD1
Glutamate Degradation X	1.27	0.5	GLUD1
Corticotropin Releasing Hormone Signaling	1.18	0.0571	ADCY9,GLI2,GLI3,BDNF,ATF4,JUND
Pancreatic Adenocarcinoma Signaling	1.18	0.0571	TP53,BCL2L1,NAPEPLD,CDKN1B,PLD1,RALGDS
Granzyme B Signaling	1.16	0.125	NUMA1,CASP8
Breast Cancer Regulation by Stathmin1	1.15	0.0479	TP53,ADCY9,PPP1R3C,ARHGEF6,GNG2,ARHGEF17,ARHGEF2,CDKN1B,CAMK2G
TR/RXR Activation	1.14	0.061	LDLR,THRA,TBL1XR1,THRB,RXRA
Hereditary Breast Cancer Signaling	1.12	0.055	TP53,SMARCA2,HDAC11,WEE1,HDAC7,DDB2
tRNA Charging	1.11	0.0811	CARS2,AARS,NARS2
Diphthamide Biosynthesis	1.1	0.333	DPH5
RhoGDI Signaling	1.07	0.0479	ARHGEF6,GNG2,ARHGAP35,ARHGAP12,PIP4K2B,ARHGEF17,ARHGEF2,ARHGAP8/PRR5-ARHGAP8
Factors Promoting Cardiogenesis in Vertebrates	1.06	0.0575	BMP4,FZD2,WNT11,TCF7L2,FZD7
Axonal Guidance Signaling	1.05	0.0394	SEMA6D,MICAL1,PXN,GLI2,BMP4,GLI3,FES,GLIS1,BDNF,ARHGEF6,GNG2,EPHB3,NFATC4,FZD2,WNT11,FZD7
Role of NFAT in Cardiac Hypertrophy	1.04	0.0473	ADCY9,HDAC11,HDAC7,MAP3K1,GNG2,NFATC4,CABIN1,CAMK2G
p38 MAPK Signaling	1.03	0.0522	TP53,DDIT3,HSPB2,ATF4,EEF2K,TAB1
Colorectal Cancer Metastasis Signaling	1.03	0.0439	TP53,BCL2L1,ADCY9,ARRB1,GNG2,FZD2,RALGDS,WNT11,TCF7L2,FZD7
PPAR Signaling	1.01	0.0556	NR2F1,NR1H3,RXRA,CITED2,TAB1
Chronic Myeloid Leukemia Signaling	0.992	0.0549	TP53,BCL2L1,HDAC11,HDAC7,CDKN1B
SAPK/JNK Signaling	0.992	0.0549	TP53,MAP3K12,MAP3K1,GNG2,TAB1
Protein Kinase A Signaling	0.991	0.0397	ADCY9,PXN,GLI3,PTK2B,PPP1R3C,GNG2,MAP3K1,ATF4,HIST1H1D,PDE8B,NFATC4,EYA1,TCF7L2,CAMK2G
Acetate Conversion to Acetyl-CoA	0.982	0.25	ACSS1
Endoplasmic Reticulum Stress Pathway	0.958	0.0952	DDIT3,ATF4
PEDF Signaling	0.928	0.058	TP53,BCL2L1,BDNF,CASP8
Tetrapyrrole Biosynthesis II	0.89	0.2	HMBS
Human Embryonic Stem Cell Pluripotency	0.878	0.0472	BMP4,BDNF,FZD2,WNT11,TCF7L2,FZD7
Ovarian Cancer Signaling	0.867	0.0469	TP53,ARRB1,FZD2,WNT11,TCF7L2,FZD7
Estrogen-mediated S-phase Entry	0.862	0.0833	CDKN1B,SKP2
Rac Signaling	0.84	0.049	PTK2B,MAP3K1,PIP4K2B,PLD1,ANK1
Ethanol Degradation II	0.833	0.08	ADH5,ACSS1
Phospholipases	0.831	0.0612	NAPEPLD,PNPLA3,PLD1
Cell Cycle: G2/M DNA Damage Checkpoint Regulation	0.831	0.0612	TP53,WEE1,SKP2
Arginine Biosynthesis IV	0.817	0.167	GLUD1
Glycoaminoglycan-protein Linkage Region Biosynthesis	0.817	0.167	XYLT2
Pregnenolone Biosynthesis	0.817	0.167	MICAL1
Antiproliferative Role of TOB in T Cell Signaling	0.806	0.0769	CDKN1B,SKP2
VDR/RXR Activation	0.804	0.0519	RUNX2,HOXA10,CDKN1B,RXRA
Role of NANOG in Mammalian Embryonic Stem Cell Pluripotency	0.791	0.0472	TP53,BMP4,FZD2,WNT11,FZD7
Calcium Signaling	0.778	0.0422	RAP2B,HDAC11,HDAC7,ATF4,NFATC4,CABIN1,CAMK2G
Prostate Cancer Signaling	0.776	0.0506	TP53,AR,ATF4,CDKN1B
Melanocyte Development and Pigmentation Signaling	0.736	0.0488	ADCY9,MITF,ATF4,KIT
Oleate Biosynthesis II (Animals)	0.704	0.125	SCD
Histidine Degradation VI	0.704	0.125	MICAL1
RANK Signaling in Osteoclasts	0.699	0.0471	MAP3K12,PTK2B,MITF,MAP3K1
PAK Signaling	0.675	0.046	PXN,PTK2B,ARHGEF6,EPHB3
Role of Osteoblasts, Osteoclasts and Chondrocytes in Rheumatoid Arthritis	0.671	0.0381	BMP4,PTK2B,RUNX2,NFATC4,FZD2,WNT11,TCF7L2,FZD7
Induction of Apoptosis by HIV1	0.666	0.0508	TP53,BCL2L1,CASP8
Heme Biosynthesis II	0.658	0.111	HMBS
UDP-N-acetyl-D-galactosamine Biosynthesis II	0.658	0.111	GNPDA1
Folate Transformations I	0.658	0.111	MTHFR
IL-1 Signaling	0.63	0.044	ADCY9,MAP3K1,GNG2,TAB1
Huntington's Disease Signaling	0.629	0.037	TP53,BCL2L1,BDNF,HDAC11,HDAC7,GNG2,ATF4,CASP8
PXR/RXR Activation	0.625	0.0484	SCD,PCK2,RXRA
FcÎ³ Receptor-mediated Phagocytosis in Macrophages and Monocytes	0.619	0.0435	NAPEPLD,PXN,PTK2B,PLD1
GNRH Signaling	0.588	0.0397	MAP3K12,ADCY9,MAP3K1,ATF4,CAMK2G
Neurotrophin/TRK Signaling	0.586	0.0462	SPRY1,BDNF,ATF4
Endothelin-1 Signaling	0.585	0.038	ADCY9,NAPEPLD,SHC2,PNPLA3,CASP8,PLD1
p53 Signaling	0.578	0.0417	TP53,BCL2L1,TP53INP1,SNAI2
Notch Signaling	0.575	0.0541	DTX3,LFNG
CDK5 Signaling	0.568	0.0412	ADCY9,BDNF,CABLES1,PPP1R3C
Paxillin Signaling	0.568	0.0412	PXN,PTK2B,ARHGEF6,GIT2
Agrin Interactions at Neuromuscular Junction	0.562	0.0448	PXN,ARHGEF6,UTRN
April Mediated Signaling	0.559	0.0526	MAP3K1,NFATC4
Ubiquinol-10 Biosynthesis (Eukaryotic)	0.55	0.0833	MICAL1
Role of PKR in Interferon Induction and Antiviral Response	0.528	0.05	TP53,CASP8
B Cell Activating Factor Signaling	0.528	0.05	MAP3K1,NFATC4
Melanoma Signaling	0.513	0.0488	TP53,MITF
Ephrin B Signaling	0.507	0.0417	PXN,GNG2,EPHB3
Toll-like Receptor Signaling	0.507	0.0417	MAP3K1,TIRAP,TAB1
BMP signaling pathway	0.507	0.0417	BMP4,RUNX2,TAB1
NGF Signaling	0.504	0.0385	TP53,MAP3K12,MAP3K1,ATF4
Renin-Angiotensin Signaling	0.496	0.0381	ADCY9,PTK2B,MAP3K1,SHC2
Role of Tissue Factor in Cancer	0.496	0.0381	TP53,BCL2L1,ARRB1,PTK2B
DNA Double-Strand Break Repair by Homologous Recombination	0.495	0.0714	RAD52
Î³-glutamyl Cycle	0.495	0.0714	OPLAH
Oxidative Ethanol Degradation III	0.495	0.0714	ACSS1
HER-2 Signaling in Breast Cancer	0.487	0.0405	TP53,PARD6G,CDKN1B
Glioblastoma Multiforme Signaling	0.486	0.036	TP53,CDKN1B,FZD2,WNT11,FZD7
Acute Myeloid Leukemia Signaling	0.477	0.04	RARA,KIT,TCF7L2
Granzyme A Signaling	0.47	0.0667	HIST1H1D
GÎ±q Signaling	0.465	0.0352	NAPEPLD,PTK2B,GNG2,NFATC4,PLD1
PKCÎ¸ Signaling in T Lymphocytes	0.464	0.0367	MAP3K12,MAP3K1,NFATC4,CAMK2G
Xenobiotic Metabolism Signaling	0.462	0.0328	AHRR,MAP3K12,MAP3K1,RXRA,AHR,CYP1B1,CITED2,CAMK2G
Ethanol Degradation IV	0.448	0.0625	ACSS1
IL-8 Signaling	0.438	0.0333	BCL2L1,NAPEPLD,PTK2B,GNG2,PLD1,LASP1
TNFR1 Signaling	0.436	0.0426	MAP3K1,CASP8
Glucocorticoid Receptor Signaling	0.427	0.0319	BCL2L1,AR,PCK2,SMARCA2,POU2F2,MAP3K1,NFATC4,TAB1
LXR/RXR Activation	0.426	0.0351	SCD,LDLR,NR1H3,RXRA
UVA-Induced MAPK Signaling	0.422	0.037	TP53,BCL2L1,PARP16
PI3K Signaling in B Lymphocytes	0.419	0.0348	ATF4,NFATC4,PLEKHA2,CAMK2G
GÎ±i Signaling	0.419	0.0348	ADCY9,GNG2,ADORA1,RALGDS
FXR/RXR Activation	0.412	0.0345	PCK2,RARA,NR1H3,RXRA
1D-myo-inositol Hexakisphosphate Biosynthesis II (Mammalian)	0.408	0.0556	ITPKB
D-myo-inositol (1,3,4)-trisphosphate Biosynthesis	0.408	0.0556	ITPKB
Nur77 Signaling in T Lymphocytes	0.403	0.04	RXRA,CABIN1
FAK Signaling	0.397	0.0357	PXN,ARHGEF6,GIT2
Cardiomyocyte Differentiation via BMP Receptors	0.39	0.0526	BMP4
GADD45 Signaling	0.39	0.0526	TP53
DNA damage-induced 14-3-3Ïƒ Signaling	0.39	0.0526	TP53
HIPPO signaling	0.39	0.0353	AJUBA,PPP1R3C,SKP2
Hepatic Cholestasis	0.384	0.0323	ADCY9,RARA,NR1H3,TIRAP,RXRA
Unfolded protein response	0.382	0.0385	DDIT3,ATF4
TGF-Î² Signaling	0.382	0.0349	BMP4,RUNX2,TAB1
Apoptosis Signaling	0.382	0.0349	TP53,BCL2L1,CASP8
VEGF Signaling	0.374	0.0345	BCL2L1,PXN,PTK2B
Antioxidant Action of Vitamin C	0.36	0.0337	NAPEPLD,PNPLA3,PLD1
Regulation of Cellular Mechanics by Calpain Protease	0.354	0.0364	PXN,CDKN1B
Death Receptor Signaling	0.353	0.0333	PARP16,HSPB2,CASP8
Cardiac Î²-adrenergic Signaling	0.348	0.0317	ADCY9,PPP1R3C,GNG2,PDE8B
T Cell Receptor Signaling	0.346	0.033	PAG1,MAP3K1,NFATC4
Myc Mediated Apoptosis Signaling	0.336	0.0351	TP53,CASP8
Triacylglycerol Degradation	0.328	0.0435	PNPLA3
D-myo-inositol (1,4,5)-Trisphosphate Biosynthesis	0.328	0.0435	PIP4K2B
Superpathway of D-myo-inositol (1,4,5)-trisphosphate Metabolism	0.328	0.0435	ITPKB
Role of JAK1 and JAK3 in Î³c Cytokine Signaling	0.328	0.0345	FES,PTK2B
NF-ÎºB Signaling	0.326	0.0301	BMP4,MAP3K1,TIRAP,CASP8,TAB1
Telomerase Signaling	0.326	0.0319	TP53,HDAC11,HDAC7
ATM Signaling	0.32	0.0339	TP53,ATF4
Antiproliferative Role of Somatostatin Receptor 2	0.32	0.0339	GNG2,CDKN1B
Tumoricidal Function of Hepatic Natural Killer Cells	0.315	0.0417	CASP8
Bupropion Degradation	0.315	0.0417	CYP1B1
Role of BRCA1 in DNA Damage Response	0.312	0.0333	TP53,SMARCA2
Role of Macrophages, Fibroblasts and Endothelial Cells in Rheumatoid Arthritis	0.307	0.0286	ROR2,ATF4,NFATC4,FZD2,WNT11,TCF7L2,FZD7,CAMK2G
GM-CSF Signaling	0.304	0.0328	BCL2L1,CAMK2G
IL-15 Production	0.303	0.04	PTK2B
Acetone Degradation I (to Methylglyoxal)	0.303	0.04	CYP1B1
iCOS-iCOSL Signaling in T Helper Cells	0.295	0.0303	NFATC4,PLEKHA2,CAMK2G
Non-Small Cell Lung Cancer Signaling	0.289	0.0317	TP53,RXRA
Hypoxia Signaling in the Cardiovascular System	0.289	0.0317	TP53,ATF4
Superpathway of Inositol Phosphate Compounds	0.286	0.0286	PPAPDC2,ITPKB,PPM1H,PPFIBP2,PIP4K2B
Sphingosine-1-phosphate Signaling	0.284	0.0297	ADCY9,PTK2B,CASP8
Role of p14/p19ARF in Tumor Suppression	0.28	0.037	TP53
HGF Signaling	0.278	0.0294	MAP3K12,PXN,MAP3K1
CCR5 Signaling in Macrophages	0.275	0.0308	PTK2B,GNG2
Cardiac Hypertrophy Signaling	0.275	0.0279	MAP3K12,ADCY9,MAP3K1,GNG2,NFATC4,TAB1
3-phosphoinositide Biosynthesis	0.271	0.0284	PPAPDC2,PPM1H,PPFIBP2,PIP4K2B
TNFR2 Signaling	0.269	0.0357	MAP3K1
Retinol Biosynthesis	0.269	0.0357	PNPLA3
Noradrenaline and Adrenaline Degradation	0.269	0.0357	ADH5
ILK Signaling	0.269	0.0279	PXN,SNAI2,PPAP2B,ARHGEF6,ATF4
Chemokine Signaling	0.269	0.0303	PTK2B,CAMK2G
Cytotoxic T Lymphocyte-mediated Apoptosis of Target Cells	0.259	0.0345	CASP8
G Protein Signaling Mediated by Tubby	0.259	0.0345	GNG2
Thrombin Signaling	0.257	0.0275	ADCY9,ARHGEF6,GNG2,ARHGEF2,CAMK2G
ERK/MAPK Signaling	0.257	0.0275	PXN,PTK2B,HSPB2,PPP1R3C,ATF4
Leukocyte Extravasation Signaling	0.253	0.0273	PXN,PTK2B,ARHGAP35,ARHGAP12,ARHGAP8/PRR5-ARHGAP8
Synaptic Long Term Potentiation	0.252	0.028	PPP1R3C,ATF4,CAMK2G
Role of JAK2 in Hormone-like Cytokine Signaling	0.25	0.0333	SOCS2
GÎ±s Signaling	0.248	0.0278	ADCY9,GNG2,ATF4
JAK/Stat Signaling	0.243	0.0286	BCL2L1,SOCS2
tRNA Splicing	0.241	0.0323	PDE8B
Triacylglycerol Biosynthesis	0.241	0.0323	PPAP2B
STAT3 Pathway	0.238	0.0282	MAP3K12,SOCS2
Inhibition of Angiogenesis by TSP1	0.232	0.0312	TP53
IL-9 Signaling	0.224	0.0303	SOCS2
TWEAK Signaling	0.224	0.0303	CASP8
Nucleotide Excision Repair Pathway	0.216	0.0294	ERCC6
Cell Cycle Regulation by BTG Family Proteins	0.208	0.0286	BTG2
Role of RIG1-like Receptors in Antiviral Innate Immunity	0.201	0.0278	CASP8
Estrogen Biosynthesis	0.201	0.0278	CYP1B1

## Sheet: cluster_7
Ingenuity Canonical Pathways	-log(p-value)	Ratio	Molecules
Factors Promoting Cardiogenesis in Vertebrates	4.06	0.069	FZD8,CCNE2,CCNE1,FZD5,PRKCH,BMPR1B
HER-2 Signaling in Breast Cancer	3.42	0.0676	CCNE2,CCNE1,PARD6B,ERBB3,PRKCH
GADD45 Signaling	3.3	0.158	CCNE2,CCNE1,GADD45G
Estrogen-mediated S-phase Entry	3	0.125	CCNE2,CCNE1,CDC25A
Aldosterone Signaling in Epithelial Cells	2.95	0.0429	PLCG2,HSPH1,HSPB8,PRKCH,HSPD1,DNAJB9
Antiproliferative Role of TOB in T Cell Signaling	2.89	0.115	CCNE2,CCNE1,RPS6KA1
Growth Hormone Signaling	2.65	0.0606	PLCG2,RPS6KA5,PRKCH,RPS6KA1
Adipogenesis pathway	2.45	0.041	FGFR3,FZD8,ARNTL,FZD5,RPS6KA1
Wnt/Ca+ pathway	2.08	0.06	FZD8,PLCG2,FZD5
Xanthine and Xanthosine Salvage	2.08	1	PNP
Unfolded protein response	2.03	0.0577	HSPH1,ERO1LB,DNAJB9
DNA damage-induced 14-3-3Ïƒ Signaling	1.97	0.105	CCNE2,CCNE1
Calcium-induced T Lymphocyte Apoptosis	1.95	0.0536	NR4A1,ATP2A3,PRKCH
Cell Cycle: G1/S Checkpoint Regulation	1.81	0.0476	CCNE2,CCNE1,CDC25A
Guanine and Guanosine Salvage I	1.78	0.5	PNP
Adenine and Adenosine Salvage I	1.78	0.5	PNP
STAT3 Pathway	1.67	0.0423	FGFR3,BMPR1B,CDC25A
eNOS Signaling	1.61	0.0303	AQP3,PLCG2,PRKCH,CHRNA5
Cyclins and Cell Cycle Regulation	1.58	0.039	CCNE2,CCNE1,CDC25A
Molecular Mechanisms of Cancer	1.55	0.0199	FZD8,CCNE2,CCNE1,FZD5,PRKCH,BMPR1B,CDC25A
Prostate Cancer Signaling	1.55	0.038	CCNE2,CCNE1,NKX3-1
Glioblastoma Multiforme Signaling	1.54	0.0288	FZD8,CCNE1,PLCG2,FZD5
UVA-Induced MAPK Signaling	1.52	0.037	PLCG2,RPS6KA5,RPS6KA1
Melanocyte Development and Pigmentation Signaling	1.51	0.0366	PLCG2,RPS6KA5,RPS6KA1
ErbB Signaling	1.5	0.0361	PLCG2,ERBB3,PRKCH
Arsenate Detoxification I (Glutaredoxin)	1.48	0.25	PNP
Creatine-phosphate Biosynthesis	1.48	0.25	CKB
Arginine Degradation I (Arginase Pathway)	1.48	0.25	ARG2
Neuregulin Signaling	1.47	0.0353	PLCG2,ERBB3,PRKCH
Virus Entry via Endocytic Pathways	1.47	0.0353	CD55,PLCG2,PRKCH
Cell Cycle Regulation by BTG Family Proteins	1.47	0.0571	CCNE2,CCNE1
Neuropathic Pain Signaling In Dorsal Horn Neurons	1.46	0.0349	KCNN4,PLCG2,PRKCH
Dopamine-DARPP32 Feedback in cAMP Signaling	1.43	0.0265	PLCG2,CREM,ATP2A3,PRKCH
Adenine and Adenosine Salvage III	1.39	0.2	PNP
Purine Ribonucleosides Degradation to Ribose-1-phosphate	1.39	0.2	PNP
Role of IL-17F in Allergic Inflammatory Airway Diseases	1.36	0.05	RPS6KA5,RPS6KA1
Nitric Oxide Signaling in the Cardiovascular System	1.36	0.0319	ATP2A3,ARG2,PRKCH
Urea Cycle	1.31	0.167	ARG2
Arginine Degradation VI (Arginase 2 Pathway)	1.31	0.167	ARG2
NF-ÎºB Signaling	1.3	0.0241	FGFR3,PLCG2,PELI1,BMPR1B
nNOS Signaling in Neurons	1.29	0.0455	PRKCH,RASD1
Protein Ubiquitination Pathway	1.27	0.0205	HSPH1,HSPB8,HSPD1,DNAJB9,USP2
NRF2-mediated Oxidative Stress Response	1.25	0.0233	HSPB8,PRKCH,DNAJB9,FKBP5
NGF Signaling	1.25	0.0288	PLCG2,RPS6KA5,RPS6KA1
Citrulline Biosynthesis	1.25	0.143	ARG2
Corticotropin Releasing Hormone Signaling	1.24	0.0286	PLCG2,NR4A1,PRKCH
Role of NANOG in Mammalian Embryonic Stem Cell Pluripotency	1.23	0.0283	FZD8,FZD5,BMPR1B
Synaptic Long Term Potentiation	1.22	0.028	PLCG2,PRKCH,RPS6KA1
CNTF Signaling	1.22	0.0417	RPS6KA5,RPS6KA1
Regulation of the Epithelial-Mesenchymal Transition Pathway	1.22	0.0226	FGFR3,FZD8,PARD6B,FZD5
Phospholipases	1.2	0.0408	PLCG2,LIPG
Cell Cycle: G2/M DNA Damage Checkpoint Regulation	1.2	0.0408	CKS2,RPS6KA1
14-3-3-mediated Signaling	1.18	0.027	PLCG2,PRKCH,RPS6KA1
ERK/MAPK Signaling	1.18	0.022	PLCG2,RPS6KA5,RPS6KA1,DUSP2
Semaphorin Signaling in Neurons	1.17	0.0392	SEMA4D,RND1
UVB-Induced MAPK Signaling	1.17	0.0392	RPS6KA5,PRKCH
Thrombopoietin Signaling	1.14	0.0377	PLCG2,PRKCH
Calcium Transport I	1.14	0.111	ATP2A3
ErbB4 Signaling	1.1	0.0357	PLCG2,PRKCH
ATM Signaling	1.06	0.0339	GADD45G,CDC25A
Human Embryonic Stem Cell Pluripotency	1.05	0.0236	FGFR3,FZD8,FZD5
D-myo-inositol-5-phosphate Metabolism	1.04	0.0234	PLCG2,DUSP2,CDC25A
PCP pathway	1.04	0.0328	FZD8,FZD5
cAMP-mediated signaling	1.03	0.0194	CREM,RPS6KA1,PTGER4,ADRB2
ERK5 Signaling	1.01	0.0317	RPS6KA5,RPS6KA1
Melatonin Signaling	1	0.0312	PLCG2,PRKCH
Erythropoietin Signaling	0.992	0.0308	PLCG2,PRKCH
CCR5 Signaling in Macrophages	0.992	0.0308	PLCG2,PRKCH
Superpathway of Citrulline Metabolism	0.987	0.0769	ARG2
Guanosine Nucleotides Degradation III	0.987	0.0769	PNP
TREM1 Signaling	0.98	0.0303	PLCG2,CD83
Role of Wnt/GSK-3Î² Signaling in the Pathogenesis of Influenza	0.98	0.0303	FZD8,FZD5
Macropinocytosis Signaling	0.98	0.0303	PLCG2,PRKCH
Basal Cell Carcinoma Signaling	0.97	0.0299	FZD8,FZD5
Urate Biosynthesis/Inosine 5'-phosphate Degradation	0.957	0.0714	PNP
FLT3 Signaling in Hematopoietic Progenitor Cells	0.938	0.0286	RPS6KA5,RPS6KA1
Prolactin Signaling	0.938	0.0286	PLCG2,PRKCH
Small Cell Lung Cancer Signaling	0.938	0.0286	CCNE2,CCNE1
Extrinsic Prothrombin Activation Pathway	0.929	0.0667	PROC
Glutathione Redox Reactions I	0.929	0.0667	GPX3
Adenosine Nucleotides Degradation II	0.929	0.0667	PNP
BMP signaling pathway	0.918	0.0278	BMPR1B,PITX2
Axonal Guidance Signaling	0.909	0.0148	FZD8,SEMA4D,RND1,PLCG2,FZD5,PRKCH
VEGF Family Ligand-Receptor Interactions	0.908	0.0274	PLCG2,PRKCH
Purine Nucleotides Degradation II (Aerobic)	0.855	0.0556	PNP
FGF Signaling	0.835	0.0247	FGFR3,RPS6KA5
CREB Signaling in Neurons	0.833	0.0189	PLCG2,PRKCH,RPS6KA1
Cardiomyocyte Differentiation via BMP Receptors	0.833	0.0526	BMPR1B
Î±-Adrenergic Signaling	0.819	0.0241	PLCG2,PRKCH
Bladder Cancer Signaling	0.819	0.0241	FGFR3,RPS6KA5
Wnt/Î²-catenin Signaling	0.811	0.0184	FZD8,SOX8,FZD5
TGF-Î² Signaling	0.794	0.0233	BMPR1B,PITX2
Apoptosis Signaling	0.794	0.0233	PLCG2,RPS6KA1
G Beta Gamma Signaling	0.786	0.023	PLCG2,PRKCH
Sertoli Cell-Sertoli Cell Junction Signaling	0.783	0.0179	TJP2,SORBS1,PLS1
Protein Kinase A Signaling	0.765	0.0142	PLCG2,CREM,PRKCH,DUSP2,CDC25A
Triacylglycerol Degradation	0.757	0.0435	LIPG
D-myo-inositol (1,4,5)-Trisphosphate Biosynthesis	0.757	0.0435	PLCG2
Glioma Signaling	0.749	0.0217	PLCG2,PRKCH
Mouse Embryonic Stem Cell Pluripotency	0.749	0.0217	FZD8,FZD5
Production of Nitric Oxide and Reactive Oxygen Species in Macrophages	0.747	0.0171	PLCG2,ARG2,PRKCH
Superpathway of Inositol Phosphate Compounds	0.747	0.0171	PLCG2,DUSP2,CDC25A
mTOR Signaling	0.718	0.0166	RPS6KA5,PRKCH,RPS6KA1
Thrombin Signaling	0.713	0.0165	PLCG2,PRKCH,GATA3
Cell Cycle Control of Chromosomal Replication	0.709	0.0385	ORC6
Complement System	0.709	0.0385	CD55
Natural Killer Cell Signaling	0.7	0.0202	PLCG2,PRKCH
Intrinsic Prothrombin Activation Pathway	0.694	0.037	PROC
Cholecystokinin/Gastrin-mediated Signaling	0.694	0.02	CREM,PRKCH
Role of Macrophages, Fibroblasts and Endothelial Cells in Rheumatoid Arthritis	0.688	0.0143	FZD8,PLCG2,FZD5,PRKCH
Breast Cancer Regulation by Stathmin1	0.685	0.016	CCNE2,CCNE1,PRKCH
HGF Signaling	0.681	0.0196	PLCG2,PRKCH
Retinol Biosynthesis	0.68	0.0357	LIPG
Fc Epsilon RI Signaling	0.668	0.0192	PLCG2,PRKCH
G Protein Signaling Mediated by Tubby	0.667	0.0345	PLCG2
Renin-Angiotensin Signaling	0.662	0.019	PLCG2,PRKCH
Role of Tissue Factor in Cancer	0.662	0.019	RPS6KA5,RPS6KA1
Sperm Motility	0.65	0.0187	PLCG2,PRKCH
GÎ±s Signaling	0.644	0.0185	PTGER4,ADRB2
4-1BB Signaling in T Lymphocytes	0.641	0.0323	TNFSF9
Circadian Rhythm Signaling	0.629	0.0312	ARNTL
Coagulation System	0.629	0.0312	PROC
Role of Pattern Recognition Receptors in Recognition of Bacteria and Viruses	0.616	0.0177	PLCG2,PRKCH
Cellular Effects of Sildenafil (Viagra)	0.616	0.0177	KCNN4,PLCG2
p70S6K Signaling	0.616	0.0177	PLCG2,PRKCH
P2Y Purigenic Receptor Signaling Pathway	0.616	0.0177	PLCG2,PRKCH
D-myo-inositol (1,4,5,6)-Tetrakisphosphate Biosynthesis	0.605	0.0174	DUSP2,CDC25A
D-myo-inositol (3,4,5,6)-tetrakisphosphate Biosynthesis	0.605	0.0174	DUSP2,CDC25A
p38 MAPK Signaling	0.605	0.0174	RPS6KA5,RPS6KA1
PTEN Signaling	0.6	0.0172	FGFR3,BMPR1B
Cardiac Hypertrophy Signaling	0.575	0.014	PLCG2,RPS6KA1,ADRB2
Synaptic Long Term Depression	0.559	0.0161	PLCG2,PRKCH
Transcriptional Regulatory Network in Embryonic Stem Cells	0.555	0.0256	GBX2
FcÎ³RIIB Signaling in B Lymphocytes	0.546	0.025	PLCG2
Mechanisms of Viral Exit from Host Cells	0.546	0.025	PRKCH
Ovarian Cancer Signaling	0.54	0.0156	FZD8,FZD5
Colorectal Cancer Metastasis Signaling	0.53	0.0132	FZD8,FZD5,PTGER4
UVC-Induced MAPK Signaling	0.528	0.0238	PRKCH
AMPK Signaling	0.526	0.0153	CHRNA5,ADRB2
3-phosphoinositide Degradation	0.522	0.0152	DUSP2,CDC25A
Aryl Hydrocarbon Receptor Signaling	0.513	0.0149	CCNE2,CCNE1
G-Protein Coupled Receptor Signaling	0.485	0.0124	RPS6KA1,PTGER4,ADRB2
3-phosphoinositide Biosynthesis	0.484	0.0142	DUSP2,CDC25A
GÎ±q Signaling	0.48	0.0141	PLCG2,PRKCH
Nur77 Signaling in T Lymphocytes	0.466	0.02	NR4A1
Gap Junction Signaling	0.464	0.0137	PLCG2,PRKCH
Role of IL-17A in Arthritis	0.452	0.0192	RPS6KA1
GABA Receptor Signaling	0.452	0.0192	KCNN4
Tec Kinase Signaling	0.442	0.0132	PLCG2,PRKCH
Dendritic Cell Maturation	0.438	0.0131	PLCG2,CD83
Germ Cell-Sertoli Cell Junction Signaling	0.435	0.013	SORBS1,PLS1
Role of CHK Proteins in Cell Cycle Checkpoint Control	0.433	0.0182	CDC25A
ErbB2-ErbB3 Signaling	0.433	0.0182	ERBB3
Regulation of Cellular Mechanics by Calpain Protease	0.433	0.0182	CCNE1
Hepatic Cholestasis	0.431	0.0129	TJP2,PRKCH
Endothelin-1 Signaling	0.421	0.0127	PLCG2,PRKCH
Eicosanoid Signaling	0.409	0.0169	PTGER4
Agranulocyte Adhesion and Diapedesis	0.398	0.0121	CXCL14,PODXL
Calcium Signaling	0.395	0.012	ATP2A3,CHRNA5
Mitotic Roles of Polo-Like Kinase	0.393	0.0161	CDC25A
Pyridoxal 5'-phosphate Salvage Pathway	0.393	0.0161	PRKCH
Role of NFAT in Cardiac Hypertrophy	0.385	0.0118	PLCG2,PRKCH
T Helper Cell Differentiation	0.377	0.0154	GATA3
Neurotrophin/TRK Signaling	0.377	0.0154	RPS6KA1
IL-10 Signaling	0.372	0.0152	ARG2
GDNF Family Ligand-Receptor Interactions	0.372	0.0152	PLCG2
Chemokine Signaling	0.372	0.0152	PLCG2
Agrin Interactions at Neuromuscular Junction	0.367	0.0149	ERBB3
Renal Cell Carcinoma Signaling	0.367	0.0149	EGLN3
Leptin Signaling in Obesity	0.362	0.0147	PLCG2
Caveolar-mediated Endocytosis Signaling	0.353	0.0143	CD55
IL-3 Signaling	0.353	0.0143	PRKCH
Leukocyte Extravasation Signaling	0.345	0.0109	PLCG2,PRKCH
LPS-stimulated MAPK Signaling	0.344	0.0139	PRKCH
NF-ÎºB Activation by Viruses	0.344	0.0139	PRKCH
PDGF Signaling	0.335	0.0135	PLCG2
Regulation of IL-2 Expression in Activated and Anergic T Lymphocytes	0.327	0.0132	PLCG2
VDR/RXR Activation	0.323	0.013	PRKCH
Communication between Innate and Adaptive Immune Cells	0.323	0.013	CD83
Systemic Lupus Erythematosus Signaling	0.32	0.0104	PLCG2,CREM
Crosstalk between Dendritic Cells and Natural Killer Cells	0.311	0.0125	CD83
FAK Signaling	0.296	0.0119	PLCG2
HIPPO signaling	0.293	0.0118	TJP2
Salvage Pathways of Pyrimidine Ribonucleotides	0.286	0.0115	PRKCH
VEGF Signaling	0.286	0.0115	PLCG2
Role of Osteoblasts, Osteoclasts and Chondrocytes in Rheumatoid Arthritis	0.281	0.00952	FZD8,FZD5
Antioxidant Action of Vitamin C	0.279	0.0112	PLCG2
FcÎ³ Receptor-mediated Phagocytosis in Macrophages and Monocytes	0.27	0.0109	PRKCH
p53 Signaling	0.257	0.0104	GADD45G
HIF1Î± Signaling	0.257	0.0104	EGLN3
Signaling by Rho Family GTPases	0.251	0.00889	SEPT3,DES
Phospholipase C Signaling	0.249	0.00885	PLCG2,PRKCH
Sphingosine-1-phosphate Signaling	0.243	0.0099	PLCG2
Type I Diabetes Mellitus Signaling	0.238	0.00971	HSPD1
fMLP Signaling in Neutrophils	0.233	0.00952	PRKCH
Pancreatic Adenocarcinoma Signaling	0.233	0.00952	CCNE1
Type II Diabetes Mellitus Signaling	0.223	0.00917	PRKCH
Hereditary Breast Cancer Signaling	0.223	0.00917	GADD45G
PKCÎ¸ Signaling in T Lymphocytes	0.223	0.00917	PLCG2
CCR3 Signaling in Eosinophils	0.22	0.00909	PRKCH
Androgen Signaling	0.22	0.00909	PRKCH
LXR/RXR Activation	0.211	0.00877	ARG2
PI3K Signaling in B Lymphocytes	0.208	0.0087	PLCG2
RhoA Signaling	0.2	0.0084	2014-09-03

## Sheet: cluster_8
Ingenuity Canonical Pathways	-log(p-value)	Ratio	Molecules
Hepatic Fibrosis / Hepatic Stellate Cell Activation	13.9	0.138	IGFBP4,TNFSF4,COL8A1,PDGFC,COL15A1,TGFBR2,COL1A2,COL16A1,COL5A1,TGFB2,PDGFRA,TNFRSF11B,PDGFRB,COL5A2,COL12A1,IGFBP5,MMP2,TNFSF18,COL1A1,IGF2,COL6A3,ACTA2,IGFBP3,COL11A1,COL7A1,COL3A1
Inhibition of Matrix Metalloproteases	5.08	0.189	HSPG2,SDC1,RECK,THBS2,MMP2,MMP11,LRP1
Inhibition of Angiogenesis by TSP1	3.36	0.156	HSPG2,TGFBR2,SDC1,THBS1,GUCY1A2
Axonal Guidance Signaling	3.16	0.0468	DPYSL2,SLIT3,PAPPA,PLXNC1,ADAMTS1,SEMA5A,UNC5B,CXCL12,MMP2,PDGFC,WNT2,LIMK1,PLCD3,PLXNB2,MMP11,ROBO2,ADAMTS5,WNT5A,NRP1
ILK Signaling	2.95	0.0615	TGFB1I1,FBLIM1,LIMS2,RND3,ACTA2,FLNA,IRS1,RHOJ,ACTG2,ACTG1,PDGFC
Wnt/Î²-catenin Signaling	2.72	0.0613	TGFBR2,GJA1,TCF4,APPL2,RARB,TGFB2,DKK1,WNT2,LRP1,WNT5A
Cellular Effects of Sildenafil (Viagra)	2.66	0.0708	PLCD3,ACTA2,GUCY1A2,PDE5A,MYLK,ACTG2,ACTG1,PDE1C
Glioblastoma Multiforme Signaling	2.66	0.0647	PLCD3,IGF2,RND3,PDGFRA,RHOJ,PDGFC,WNT2,PDGFRB,WNT5A
Agrin Interactions at Neuromuscular Junction	2.62	0.0896	LAMC1,ACTA2,LAMA2,LAMB1,ACTG2,ACTG1
Caveolar-mediated Endocytosis Signaling	2.52	0.0857	ACTA2,FLNA,ITGA11,CAV1,ACTG2,ACTG1
RhoA Signaling	2.52	0.0672	LPAR6,LPAR1,RND3,ACTA2,MYLK,ACTG2,ACTG1,LIMK1
Regulation of the Epithelial-Mesenchymal Transition Pathway	2.46	0.0565	TGFBR2,LOX,TCF4,TWIST2,EGR1,TGFB2,MMP2,WNT2,PDGFRB,WNT5A
Semaphorin Signaling in Neurons	2.43	0.098	DPYSL2,RND3,RHOJ,LIMK1,NRP1
Human Embryonic Stem Cell Pluripotency	2.35	0.063	TGFBR2,TCF4,PDGFRA,TGFB2,PDGFC,WNT2,PDGFRB,WNT5A
Sphingosine-1-phosphate Signaling	2.34	0.0693	PLCD3,RND3,CASP1,PDGFRA,RHOJ,PDGFC,PDGFRB
Colorectal Cancer Metastasis Signaling	2.14	0.0482	TGFBR2,TCF4,RND3,TGFB2,RHOJ,MMP2,MMP11,PDGFC,WNT2,LRP1,WNT5A
PCP pathway	2.1	0.082	SDC1,CTHRC1,SDC3,WNT2,WNT5A
Regulation of Actin-based Motility by Rho	2.06	0.069	RND3,ACTA2,RHOJ,MYLK,ACTG2,LIMK1
Factors Promoting Cardiogenesis in Vertebrates	2.06	0.069	TBX5,TGFBR2,TCF4,TGFB2,DKK1,LRP1
Atherosclerosis Signaling	2.04	0.0609	COL1A2,COL1A1,PLA2R1,CXCL12,PDGFC,TNFRSF14,COL3A1
Role of Osteoblasts, Osteoclasts and Chondrocytes in Rheumatoid Arthritis	1.95	0.0476	COL1A1,TCF4,IKBKE,DKK1,ACP5,ADAMTS5,WNT2,LRP1,WNT5A,TNFRSF11B
Nitric Oxide Signaling in the Cardiovascular System	1.9	0.0638	BDKRB2,GUCY1A2,CAV1,PDE5A,PDGFC,PDE1C
MSP-RON Signaling Pathway	1.88	0.0889	ACTA2,ACTG2,RPS6KA2,ACTG1
Germ Cell-Sertoli Cell Junction Signaling	1.86	0.0519	TGFBR2,RND3,ACTA2,TGFB2,RHOJ,ACTG2,ACTG1,LIMK1
Intrinsic Prothrombin Activation Pathway	1.77	0.111	COL1A2,COL1A1,COL3A1
Tight Junction Signaling	1.74	0.0494	TGFBR2,F2RL2,ACTA2,TGFB2,MYLK,ACTG2,ACTG1,TNFRSF11B
LPS/IL-1 Mediated Inhibition of RXR Function	1.7	0.0457	ALDH1A1,ALDH1L2,SREBF1,ALDH3B1,SLC27A1,FMO4,NDST1,ABCA1,TNFRSF11B
VDR/RXR Activation	1.69	0.0649	IGFBP3,TGFB2,IGFBP5,VDR,HSD17B2
Histamine Degradation	1.62	0.167	HNMT,ALDH1A1
Actin Cytoskeleton Signaling	1.6	0.0439	F2R,ACTA2,FLNA,MYLK,ACTG2,SSH1,ACTG1,PDGFC,LIMK1
Glioma Invasiveness Signaling	1.59	0.0727	F2R,RND3,RHOJ,MMP2
GÎ±12/13 Signaling	1.57	0.0536	LPAR6,F2RL2,F2R,LPAR1,IKBKE,CDH11
Role of Macrophages, Fibroblasts and Endothelial Cells in Rheumatoid Arthritis	1.54	0.0393	PLCD3,TCF4,CXCL12,CEBPD,IKBKE,DKK1,PDGFC,WNT2,LRP1,WNT5A,TNFRSF11B
Virus Entry via Endocytic Pathways	1.53	0.0588	ACTA2,FLNA,CAV1,ACTG2,ACTG1
Gap Junction Signaling	1.52	0.0479	PLCD3,LPAR1,ACTA2,GUCY1A2,CAV1,ACTG2,ACTG1
Eicosanoid Signaling	1.49	0.0678	PTGIS,PTGFR,PTGIR,PLA2R1
PAK Signaling	1.49	0.0575	PDGFRA,MYLK,PDGFC,PDGFRB,LIMK1
Death Receptor Signaling	1.43	0.0556	ACTA2,IKBKE,ACTG2,ACTG1,LIMK1
PPAR Signaling	1.43	0.0556	PDGFRA,IKBKE,PDGFC,PDGFRB,TNFRSF11B
Integrin Signaling	1.37	0.0419	RND3,ACTA2,ITGA11,CAV1,RHOJ,MYLK,ACTG2,ACTG1
Amyotrophic Lateral Sclerosis Signaling	1.37	0.0532	GRIA1,GPX1,CASP1,PDGFC,GRIA3
Growth Hormone Signaling	1.34	0.0606	IGF2,IRS1,IGFBP3,RPS6KA2
PPARÎ±/RXRÎ± Activation	1.33	0.0435	TGFBR2,PLCD3,IRS1,TGFB2,IKBKE,SLC27A1,ABCA1
Ovarian Cancer Signaling	1.33	0.0469	GJA1,TCF4,MMP2,PDGFC,WNT2,WNT5A
Mechanisms of Viral Exit from Host Cells	1.32	0.075	ACTA2,ACTG2,ACTG1
Agranulocyte Adhesion and Diapedesis	1.28	0.0424	ACTA2,CXCL12,MMP2,MMP11,ACTG2,CD34,ACTG1
eNOS Signaling	1.27	0.0455	BDKRB2,LPAR6,LPAR1,GUCY1A2,CAV1,PDGFC
RhoGDI Signaling	1.26	0.0419	RND3,ACTA2,RHOJ,ACTG2,ACTG1,CDH11,LIMK1
Aryl Hydrocarbon Receptor Signaling	1.25	0.0448	ALDH1A1,NFIX,ALDH1L2,RARB,TGFB2,ALDH3B1
Methylglyoxal Degradation I	1.22	0.333	HAGHL
Thyronamine and Iodothyronamine Metabolism	1.22	0.333	DIO2
Thyroid Hormone Metabolism I (via Deiodination)	1.22	0.333	DIO2
PDGF Signaling	1.19	0.0541	PDGFRA,CAV1,PDGFC,PDGFRB
Sperm Motility	1.17	0.0467	PLCD3,PLA2R1,GUCY1A2,PDE1C,PTK7
Epithelial Adherens Junction Signaling	1.15	0.0423	TGFBR2,TCF4,ACTA2,TGFB2,ACTG2,ACTG1
IL-8 Signaling	1.12	0.0389	ANGPT1,RND3,RHOJ,IKBKE,MMP2,PDGFC,LIMK1
NAD Biosynthesis from 2-amino-3-carboxymuconate Semialdehyde	1.1	0.25	QPRT
Uracil Degradation II (Reductive)	1.1	0.25	DPYSL2
Pentose Phosphate Pathway (Oxidative Branch)	1.1	0.25	H6PD
Thymine Degradation	1.1	0.25	DPYSL2
Wnt/Ca+ pathway	1.09	0.06	PLCD3,ROR1,WNT5A
Bladder Cancer Signaling	1.05	0.0482	THBS1,MMP2,MMP11,PDGFC
Signaling by Rho Family GTPases	1.05	0.0356	RND3,ACTA2,RHOJ,MYLK,ACTG2,ACTG1,CDH11,LIMK1
FAK Signaling	1.03	0.0476	ACTA2,ACTG2,TNS1,ACTG1
Dendritic Cell Maturation	1.03	0.0392	COL1A2,PLCD3,COL1A1,IKBKE,COL3A1,TNFRSF11B
Granulocyte Adhesion and Diapedesis	1.01	0.0387	SDC1,CXCL12,MMP2,MMP11,SDC3,TNFRSF11B
Antiproliferative Role of TOB in T Cell Signaling	1.01	0.0769	TGFBR2,TGFB2
Citrulline-Nitric Oxide Cycle	1.01	0.2	ASS1
VEGF Signaling	0.992	0.046	ACTA2,ACTG2,ACTG1,PDGFC
Adipogenesis pathway	0.982	0.041	EGR2,SREBF1,TXNIP,CEBPD,WNT5A
Protein Kinase A Signaling	0.966	0.0312	TGFBR2,PLCD3,PTPRG,TCF4,PTPRU,FLNA,PTPN13,TGFB2,PDE5A,MYLK,PDE1C
Synaptic Long Term Depression	0.96	0.0403	PLCD3,GRIA1,PLA2R1,GUCY1A2,GRIA3
Arginine Biosynthesis IV	0.935	0.167	ASS1
Urea Cycle	0.935	0.167	ASS1
Retinoate Biosynthesis I	0.93	0.069	DHRS3,ALDH1A1
Glioma Signaling	0.926	0.0435	IGF2,PDGFRA,PDGFC,PDGFRB
Induction of Apoptosis by HIV1	0.925	0.0508	BBC3,IKBKE,TNFRSF11B
IGF-1 Signaling	0.889	0.0421	IGFBP4,IRS1,IGFBP3,IGFBP5
tRNA Splicing	0.883	0.0645	PDE5A,PDE1C
p53 Signaling	0.877	0.0417	MDM4,BBC3,THBS1,DRAM1
Salvage Pathways of Pyrimidine Deoxyribonucleotides	0.872	0.143	TK2
Paxillin Signaling	0.866	0.0412	ACTA2,ITGA11,ACTG2,ACTG1
Coagulation System	0.86	0.0625	BDKRB2,F2R
Dermatan Sulfate Biosynthesis (Late Stages)	0.839	0.0606	CHST14,NDST1
Remodeling of Epithelial Adherens Junctions	0.834	0.0462	ACTA2,ACTG2,ACTG1
Clathrin-mediated Endocytosis Signaling	0.829	0.0343	F2R,ACTA2,DAB2,ACTG2,ACTG1,PDGFC
Role of Wnt/GSK-3Î² Signaling in the Pathogenesis of Influenza	0.82	0.0455	TCF4,WNT2,WNT5A
Airway Pathology in Chronic Obstructive Pulmonary Disease	0.818	0.125	MMP2
Basal Cell Carcinoma Signaling	0.806	0.0448	TCF4,WNT2,WNT5A
IL-17A Signaling in Fibroblasts	0.798	0.0571	CEBPD,IKBKE
Thrombin Signaling	0.774	0.033	PLCD3,F2RL2,F2R,RND3,RHOJ,MYLK
Prostanoid Biosynthesis	0.772	0.111	PTGIS
Calcium Transport I	0.772	0.111	ATP2B4
Leucine Degradation I	0.772	0.111	BCAT1
Leukocyte Extravasation Signaling	0.767	0.0328	ACTA2,CXCL12,MMP2,MMP11,ACTG2,ACTG1
Notch Signaling	0.76	0.0541	DTX4,MAML2
STAT3 Pathway	0.754	0.0423	TGFBR2,PDGFRA,PDGFRB
Type II Diabetes Mellitus Signaling	0.738	0.0367	IRS1,IKBKE,SLC27A1,TNFRSF11B
Molecular Mechanisms of Cancer	0.737	0.0284	TGFBR2,TCF4,BBC3,RND3,IRS1,TGFB2,RHOJ,WNT2,LRP1,WNT5A
NAD biosynthesis II (from tryptophan)	0.73	0.1	QPRT
NAD Phosphorylation and Dephosphorylation	0.73	0.1	ACP5
Pentose Phosphate Pathway	0.73	0.1	H6PD
Tec Kinase Signaling	0.701	0.0329	RND3,ACTA2,RHOJ,ACTG2,ACTG1
p70S6K Signaling	0.701	0.0354	PLCD3,F2RL2,F2R,IRS1
Regulation of IL-2 Expression in Activated and Anergic T Lymphocytes	0.695	0.0395	TGFBR2,TGFB2,IKBKE
PTEN Signaling	0.674	0.0345	TGFBR2,PDGFRA,IKBKE,PDGFRB
HMGB1 Signaling	0.665	0.0342	RND3,TGFB2,RHOJ,TNFRSF11B
The Visual Cycle	0.66	0.0833	DHRS3
Crosstalk between Dendritic Cells and Natural Killer Cells	0.651	0.0375	ACTA2,ACTG2,ACTG1
Dermatan Sulfate Biosynthesis	0.632	0.0444	CHST14,NDST1
TR/RXR Activation	0.631	0.0366	COL6A3,SREBF1,DIO2
Fatty Acid Activation	0.629	0.0769	SLC27A1
Chondroitin Sulfate Degradation (Metazoa)	0.629	0.0769	CEMIP
Isoleucine Degradation I	0.629	0.0769	BCAT1
Superpathway of Citrulline Metabolism	0.629	0.0769	ASS1
Fatty Acid Î±-oxidation	0.629	0.0769	ALDH1A1
cAMP-mediated signaling	0.612	0.0291	CHRM2,PTGIR,LPAR1,PDE5A,PKIG,PDE1C
nNOS Signaling in Skeletal Muscle Cells	0.601	0.0714	SNTB1
Dermatan Sulfate Degradation (Metazoa)	0.601	0.0714	CEMIP
Oxidative Ethanol Degradation III	0.601	0.0714	ALDH1A1
Calcium Signaling	0.601	0.0301	ACTA2,GRIA1,SLC8A1,ATP2B4,GRIA3
Cardiac Î²-adrenergic Signaling	0.592	0.0317	PDE5A,SLC8A1,PKIG,PDE1C
Neuropathic Pain Signaling In Dorsal Horn Neurons	0.592	0.0349	PLCD3,GRIA1,GRIA3
TGF-Î² Signaling	0.592	0.0349	TGFBR2,TGFB2,VDR
Glutamate Receptor Signaling	0.592	0.0417	GRIA1,GRIA3
Role of NFAT in Cardiac Hypertrophy	0.581	0.0296	CTF1,TGFBR2,PLCD3,TGFB2,SLC8A1
Ephrin Receptor Signaling	0.581	0.0296	ANGPT1,PTPN13,CXCL12,PDGFC,LIMK1
Phospholipases	0.579	0.0408	PLCD3,PLA2R1
D-myo-inositol-5-phosphate Metabolism	0.578	0.0312	PLCD3,TNS3,PTPN13,ACP5
Glutathione Redox Reactions I	0.575	0.0667	GPX1
RAR Activation	0.575	0.0294	DHRS3,ALDH1A1,RARB,IGFBP3,TGFB2
Antioxidant Action of Vitamin C	0.565	0.0337	PLCD3,PLA2R1,IKBKE
Cardiac Hypertrophy Signaling	0.561	0.0279	TGFBR2,PLCD3,RND3,IRS1,TGFB2,RHOJ
Tryptophan Degradation X (Mammalian, via Tryptamine)	0.552	0.0625	ALDH1A1
Valine Degradation I	0.552	0.0625	BCAT1
Putrescine Degradation III	0.552	0.0625	ALDH1A1
Ethanol Degradation IV	0.552	0.0625	ALDH1A1
3-phosphoinositide Degradation	0.549	0.0303	TNS3,INPP4B,PTPN13,ACP5
Chronic Myeloid Leukemia Signaling	0.548	0.033	TGFBR2,TGFB2,IKBKE
Unfolded protein response	0.543	0.0385	SREBF1,CEBPD
FcÎ³ Receptor-mediated Phagocytosis in Macrophages and Monocytes	0.539	0.0326	ACTA2,ACTG2,ACTG1
Î³-linolenate Biosynthesis II (Animals)	0.53	0.0588	SLC27A1
Mitochondrial L-carnitine Shuttle Pathway	0.53	0.0588	SLC27A1
mTOR Signaling	0.509	0.0276	RND3,IRS1,RHOJ,RPS6KA2,PDGFC
HIF1Î± Signaling	0.507	0.0312	MMP2,MMP11,PDGFC
Actin Nucleation by ARP-WASP Complex	0.5	0.0357	RND3,RHOJ
CDK5 Signaling	0.499	0.0309	LAMC1,EGR1,LAMB1
Dopamine Degradation	0.49	0.0526	ALDH1A1
NAD Salvage Pathway II	0.49	0.0526	ACP5
CXCR4 Signaling	0.448	0.027	RND3,EGR1,CXCL12,RHOJ
Pyridoxal 5'-phosphate Salvage Pathway	0.442	0.0323	DMPK,LIMK1
Pancreatic Adenocarcinoma Signaling	0.442	0.0286	TGFBR2,TGFB2,PDGFC
Role of Tissue Factor in Cancer	0.442	0.0286	EGR1,RPS6KA2,LIMK1
Polyamine Regulation in Colon Cancer	0.438	0.0455	TCF4
ERK5 Signaling	0.433	0.0317	CTF1,RPS6KA2
G-Protein Coupled Receptor Signaling	0.43	0.0248	CHRM2,PTGIR,LPAR1,PDE5A,IKBKE,PDE1C
Synaptic Long Term Potentiation	0.429	0.028	PLCD3,GRIA1,GRIA3
Angiopoietin Signaling	0.425	0.0312	ANGPT1,IKBKE
Triacylglycerol Degradation	0.423	0.0435	NDST1
D-myo-inositol (1,4,5)-Trisphosphate Biosynthesis	0.423	0.0435	PLCD3
Xenobiotic Metabolism Signaling	0.421	0.0246	FTL,ALDH1A1,ALDH1L2,ALDH3B1,FMO4,NDST1
T Helper Cell Differentiation	0.417	0.0308	TGFBR2,TNFRSF11B
Hepatic Cholestasis	0.41	0.0258	SREBF1,TGFB2,IKBKE,TNFRSF11B
Thyroid Hormone Metabolism II (via Conjugation and/or Degradation)	0.409	0.0417	DIO2
Chemokine Signaling	0.408	0.0303	CXCL12,LIMK1
IL-15 Production	0.395	0.04	PTK7
Ethanol Degradation II	0.395	0.04	ALDH1A1
Endothelin-1 Signaling	0.395	0.0253	PLCD3,PLA2R1,CASP1,GUCY1A2
Role of Pattern Recognition Receptors in Recognition of Bacteria and Viruses	0.392	0.0265	PTX3,CASP1,TGFB2
Acute Phase Response Signaling	0.39	0.0252	FTL,TCF4,IKBKE,TNFRSF11B
LXR/RXR Activation	0.386	0.0263	SREBF1,ABCA1,TNFRSF11B
PEDF Signaling	0.385	0.029	TCF4,IKBKE
PI3K Signaling in B Lymphocytes	0.38	0.0261	PLCD3,IRS1,IKBKE
D-myo-inositol (1,4,5,6)-Tetrakisphosphate Biosynthesis	0.38	0.0261	TNS3,PTPN13,ACP5
D-myo-inositol (3,4,5,6)-tetrakisphosphate Biosynthesis	0.38	0.0261	TNS3,PTPN13,ACP5
GÎ±i Signaling	0.38	0.0261	CHRM2,LPAR1,CAV1
p38 MAPK Signaling	0.38	0.0261	TGFBR2,TGFB2,RPS6KA2
IL-6 Signaling	0.38	0.0261	COL1A1,IKBKE,TNFRSF11B
Small Cell Lung Cancer Signaling	0.378	0.0286	RARB,IKBKE
NF-ÎºB Activation by Viruses	0.363	0.0278	IKBKE,TNFRSF14
Ephrin B Signaling	0.363	0.0278	CXCL12,LIMK1
TNFR2 Signaling	0.358	0.0357	IKBKE
Retinol Biosynthesis	0.358	0.0357	DHRS3
Noradrenaline and Adrenaline Degradation	0.358	0.0357	ALDH1A1
Fatty Acid Î²-oxidation I	0.358	0.0357	SLC27A1
NF-ÎºB Signaling	0.357	0.0241	TGFBR2,PDGFRA,PDGFRB,TNFRSF11B
Sertoli Cell-Sertoli Cell Junction Signaling	0.349	0.0238	ACTA2,GUCY1A2,ACTG2,ACTG1
Acute Myeloid Leukemia Signaling	0.343	0.0267	RUNX1,TCF4
Role of JAK2 in Hormone-like Cytokine Signaling	0.336	0.0333	IRS1
NRF2-mediated Oxidative Stress Response	0.332	0.0233	FTL,ACTA2,ACTG2,ACTG1
4-1BB Signaling in T Lymphocytes	0.326	0.0323	IKBKE
Triacylglycerol Biosynthesis	0.326	0.0323	LPPR4
Production of Nitric Oxide and Reactive Oxygen Species in Macrophages	0.319	0.0229	RND3,RHOJ,IKBKE,TNFRSF11B
Superpathway of Inositol Phosphate Compounds	0.319	0.0229	PLCD3,TNS3,PTPN13,ACP5
Relaxin Signaling	0.318	0.0236	GUCY1A2,PDE5A,PDE1C
IL-9 Signaling	0.307	0.0303	IRS1
TWEAK Signaling	0.307	0.0303	IKBKE
UVA-Induced MAPK Signaling	0.306	0.0247	PLCD3,RPS6KA2
Stearate Biosynthesis I (Animals)	0.298	0.0294	SLC27A1
HIPPO signaling	0.284	0.0235	FAT4,FRMD6
Role of RIG1-like Receptors in Antiviral Innate Immunity	0.281	0.0278	IKBKE
Estrogen Biosynthesis	0.281	0.0278	HSD17B2
Chondroitin Sulfate Biosynthesis (Late Stages)	0.281	0.0278	NDST1
Salvage Pathways of Pyrimidine Ribonucleotides	0.274	0.023	DMPK,LIMK1
Netrin Signaling	0.273	0.027	UNC5B
April Mediated Signaling	0.265	0.0263	IKBKE
Neuroprotective Role of THOP1 in Alzheimer's Disease	0.265	0.0263	MME
3-phosphoinositide Biosynthesis	0.259	0.0213	TNS3,PTPN13,ACP5
Thyroid Cancer Signaling	0.258	0.0256	TCF4
Transcriptional Regulatory Network in Embryonic Stem Cells	0.258	0.0256	MEIS1
Phototransduction Pathway	0.258	0.0256	GUCY1A2
GÎ±q Signaling	0.255	0.0211	RND3,RHOJ,IKBKE
Role of PKR in Interferon Induction and Antiviral Response	0.251	0.025	IKBKE
B Cell Activating Factor Signaling	0.251	0.025	IKBKE
Role of IL-17F in Allergic Inflammatory Airway Diseases	0.251	0.025	RPS6KA2
Heparan Sulfate Biosynthesis (Late Stages)	0.251	0.025	NDST1
iNOS Signaling	0.231	0.0233	IKBKE
Chondroitin Sulfate Biosynthesis	0.231	0.0233	NDST1
Ephrin A Signaling	0.213	0.0217	LIMK1
Heparan Sulfate Biosynthesis	0.213	0.0217	NDST1
Serotonin Degradation	0.213	0.0217	ALDH1A1
TNFR1 Signaling	0.207	0.0213	IKBKE
CNTF Signaling	0.202	0.0208	RPS6KA2
OX40 Signaling Pathway	0.202	0.0208	TNFSF4
Nicotine Degradation II	0.197	0.0204	FMO4
Cell Cycle: G2/M DNA Damage Checkpoint Regulation	0.197	0.0204	MDM4

## Sheet: cluster_9
Ingenuity Canonical Pathways	-log(p-value)	Ratio	Molecules
Role of Pattern Recognition Receptors in Recognition of Bacteria and Viruses	12.1	0.0973	IFIH1,CXCL8,OAS1,IRF7,LIF,OAS2,DDX58,CCL5,IL6,C3AR1,IL11
Activation of IRF by Cytosolic Pattern Recognition Receptors	7.12	0.111	IFIH1,IRF7,DDX58,IL6,IFIT2,ISG15
Role of IL-17F in Allergic Inflammatory Airway Diseases	6.26	0.125	CXCL10,CXCL8,CXCL1,IL6,IL11
IL-17A Signaling in Gastric Cells	5.54	0.16	CXCL10,CXCL8,CXCL1,CCL5
Interferon Signaling	4.99	0.118	IFIT3,IFIT1,OAS1,MX1
Role of Hypercytokinemia/hyperchemokinemia in the Pathogenesis of Influenza	4.94	0.114	CXCL10,CXCL8,CCL5,IL6
Communication between Innate and Adaptive Immune Cells	4.84	0.0649	CXCL10,CXCL8,CCL5,IL6,TNFSF13B
Hematopoiesis from Pluripotent Stem Cells	4.66	0.0976	CXCL8,LIF,IL6,IL11
Differential Regulation of Cytokine Production in Macrophages and T Helper Cells by IL-17A and IL-17F	4.31	0.167	CXCL1,CCL5,IL6
Agranulocyte Adhesion and Diapedesis	4.27	0.0364	CXCL10,CXCL8,CLDN4,CXCL1,CCL5,ACTC1
IL-17 Signaling	3.72	0.0563	CXCL10,CXCL8,CXCL1,IL6
Granulocyte Adhesion and Diapedesis	3.39	0.0323	CXCL10,CXCL8,CLDN4,CXCL1,CCL5
Role of RIG1-like Receptors in Antiviral Innate Immunity	3.39	0.0833	IFIH1,IRF7,DDX58
Pathogenesis of Multiple Sclerosis	3.25	0.222	CXCL10,CCL5
Hepatic Fibrosis / Hepatic Stellate Cell Activation	3	0.0265	CXCL8,TNFSF10,CCL5,IL6,TNFSF13B
Role of IL-17A in Psoriasis	2.99	0.167	CXCL8,CXCL1
Role of IL-17A in Arthritis	2.92	0.0577	CXCL8,CXCL1,CCL5
HMGB1 Signaling	2.89	0.0342	CXCL8,LIF,IL6,IL11
Hepatic Cholestasis	2.45	0.0258	CXCL8,LIF,IL6,IL11
VDR/RXR Activation	2.43	0.039	CXCL10,SPP1,CCL5
Differential Regulation of Cytokine Production in Intestinal Epithelial Cells by IL-17A and IL-17F	2.41	0.087	CXCL1,CCL5
Altered T Cell and B Cell Signaling in Rheumatoid Arthritis	2.4	0.038	SPP1,IL6,TNFSF13B
Crosstalk between Dendritic Cells and Natural Killer Cells	2.38	0.0375	TNFSF10,IL6,ACTC1
IL-8 Signaling	2.22	0.0222	CXCL8,NCF2,HBEGF,CXCL1
NAD Biosynthesis III	2.09	0.5	NAMPT
Role of Tissue Factor in Cancer	2.06	0.0286	CXCL8,HBEGF,CXCL1
Thyroid Cancer Signaling	1.97	0.0513	CXCL10,CXCL1
Serotonin Receptor Signaling	1.92	0.0488	GCH1,IL4I1
Tetrahydrobiopterin Biosynthesis I	1.92	0.333	GCH1
Tetrahydrobiopterin Biosynthesis II	1.92	0.333	GCH1
Role of Cytokines in Mediating Communication between Immune Cells	1.83	0.0435	CXCL8,IL6
Melatonin Degradation II	1.79	0.25	IL4I1
Tryptophan Degradation to 2-amino-3-carboxymuconate Semialdehyde	1.62	0.167	IDO1
IL-17A Signaling in Airway Cells	1.58	0.0323	CXCL1,IL6
Role of Macrophages, Fibroblasts and Endothelial Cells in Rheumatoid Arthritis	1.58	0.0143	CXCL8,CCL5,IL6,TNFSF13B
IL-15 Signaling	1.56	0.0312	CXCL8,IL6
Role of MAPK Signaling in the Pathogenesis of Influenza	1.55	0.0308	CXCL10,CCL5
TREM1 Signaling	1.53	0.0303	CXCL8,IL6
Role of NFAT in Cardiac Hypertrophy	1.51	0.0178	LIF,IL6,IL11
Airway Pathology in Chronic Obstructive Pulmonary Disease	1.5	0.125	CXCL8
Leukocyte Extravasation Signaling	1.42	0.0164	CLDN4,NCF2,ACTC1
Dopamine Receptor Signaling	1.41	0.026	GCH1,IL4I1
NAD biosynthesis II (from tryptophan)	1.4	0.1	IDO1
Death Receptor Signaling	1.29	0.0222	TNFSF10,ACTC1
Phenylalanine Degradation IV (Mammalian, via Side Chain)	1.29	0.0769	IL4I1
Role of Osteoblasts, Osteoclasts and Chondrocytes in Rheumatoid Arthritis	1.28	0.0143	SPP1,IL6,IL11
Role of Lipids/Lipid Rafts in the Pathogenesis of Influenza	1.26	0.0714	RSAD2
Tryptophan Degradation X (Mammalian, via Tryptamine)	1.2	0.0625	IL4I1
Putrescine Degradation III	1.2	0.0625	IL4I1
Tryptophan Degradation III (Eukaryotic)	1.18	0.0588	IDO1
Dopamine Degradation	1.13	0.0526	IL4I1
Pyrimidine Deoxyribonucleotides De Novo Biosynthesis I	1.13	0.0526	CMPK2
Atherosclerosis Signaling	1.1	0.0174	CXCL8,IL6
IL-6 Signaling	1.1	0.0174	CXCL8,IL6
Glucocorticoid Receptor Signaling	1.09	0.012	CXCL8,CCL5,IL6
Pyrimidine Ribonucleotides Interconversion	1.07	0.0455	CMPK2
Pyrimidine Ribonucleotides De Novo Biosynthesis	1.03	0.0417	CMPK2
IL-15 Production	1.02	0.04	IL6
Role of JAK family kinases in IL-6-type Cytokine Signaling	1.02	0.04	IL6
Complement System	1	0.0385	C3AR1
Noradrenaline and Adrenaline Degradation	0.97	0.0357	IL4I1
Tec Kinase Signaling	0.901	0.0132	TNFSF10,ACTC1
IL-17A Signaling in Fibroblasts	0.879	0.0286	IL6
Inhibition of Matrix Metalloproteases	0.856	0.027	TFPI2
Tight Junction Signaling	0.856	0.0123	CLDN4,ACTC1
Sertoli Cell-Sertoli Cell Junction Signaling	0.831	0.0119	CLDN4,ACTC1
B Cell Activating Factor Signaling	0.825	0.025	TNFSF13B
Mechanisms of Viral Exit from Host Cells	0.825	0.025	ACTC1
Graft-versus-Host Disease Signaling	0.796	0.0233	IL6
Role of Oct4 in Mammalian Embryonic Stem Cell Pluripotency	0.778	0.0222	SPP1
MSP-RON Signaling Pathway	0.778	0.0222	ACTC1
Serotonin Degradation	0.769	0.0217	IL4I1
Systemic Lupus Erythematosus Signaling	0.737	0.0104	IL6,TNFSF13B
Superpathway of Melatonin Degradation	0.737	0.02	IL4I1
Retinoic acid Mediated Apoptosis Signaling	0.721	0.0192	TNFSF10
Lymphotoxin Î² Receptor Signaling	0.714	0.0189	CXCL1
Role of PI3K/AKT Signaling in the Pathogenesis of Influenza	0.706	0.0185	CCL5
PXR/RXR Activation	0.653	0.0161	IL6
ERK5 Signaling	0.647	0.0159	LIF
Angiopoietin Signaling	0.641	0.0156	ANGPTL1
Signaling by Rho Family GTPases	0.638	0.00889	NCF2,ACTC1
CCR5 Signaling in Macrophages	0.635	0.0154	CCL5
T Helper Cell Differentiation	0.635	0.0154	IL6
Remodeling of Epithelial Adherens Junctions	0.635	0.0154	ACTC1
IL-10 Signaling	0.629	0.0152	IL6
Chemokine Signaling	0.629	0.0152	CCL5
Agrin Interactions at Neuromuscular Junction	0.624	0.0149	ACTC1
Caveolar-mediated Endocytosis Signaling	0.607	0.0143	ACTC1
JAK/Stat Signaling	0.607	0.0143	IL6
Xenobiotic Metabolism Signaling	0.587	0.0082	IL6,IL4I1
Bladder Cancer Signaling	0.544	0.012	CXCL8
ErbB Signaling	0.544	0.012	HBEGF
FAK Signaling	0.539	0.0119	ACTC1
Neuregulin Signaling	0.535	0.0118	HBEGF
Virus Entry via Endocytic Pathways	0.535	0.0118	ACTC1
TGF-Î² Signaling	0.531	0.0116	IRF7
Regulation of Actin-based Motility by Rho	0.527	0.0115	ACTC1
G Beta Gamma Signaling	0.527	0.0115	HBEGF
Salvage Pathways of Pyrimidine Ribonucleotides	0.527	0.0115	CMPK2
VEGF Signaling	0.527	0.0115	ACTC1
FcÎ³ Receptor-mediated Phagocytosis in Macrophages and Monocytes	0.506	0.0109	ACTC1
Mouse Embryonic Stem Cell Pluripotency	0.506	0.0109	LIF
p53 Signaling	0.491	0.0104	PMAIP1
Paxillin Signaling	0.488	0.0103	ACTC1
HGF Signaling	0.47	0.0098	IL6
Rac Signaling	0.47	0.0098	NCF2
fMLP Signaling in Neutrophils	0.46	0.00952	NCF2
Renin-Angiotensin Signaling	0.46	0.00952	CCL5
Pancreatic Adenocarcinoma Signaling	0.46	0.00952	HBEGF
Role of NANOG in Mammalian Embryonic Stem Cell Pluripotency	0.456	0.00943	LIF
Cellular Effects of Sildenafil (Viagra)	0.434	0.00885	ACTC1
LXR/RXR Activation	0.431	0.00877	IL6
PI3K Signaling in B Lymphocytes	0.428	0.0087	ATF3
RhoA Signaling	0.416	0.0084	ACTC1
Aryl Hydrocarbon Receptor Signaling	0.377	0.00746	IL6
Epithelial Adherens Junction Signaling	0.358	0.00704	ACTC1
GÎ±q Signaling	0.358	0.00704	RGS16
Gap Junction Signaling	0.349	0.00685	ACTC1
Dendritic Cell Maturation	0.334	0.00654	IL6
Germ Cell-Sertoli Cell Junction Signaling	0.332	0.00649	ACTC1
Acute Phase Response Signaling	0.322	0.00629	IL6
PPARÎ±/RXRÎ± Activation	0.318	0.00621	IL6
NF-ÎºB Signaling	0.309	0.00602	TNFSF13B
Calcium Signaling	0.309	0.00602	ACTC1
RhoGDI Signaling	0.307	0.00599	ACTC1
NRF2-mediated Oxidative Stress Response	0.298	0.00581	ACTC1
Clathrin-mediated Endocytosis Signaling	0.293	0.00571	ACTC1
Production of Nitric Oxide and Reactive Oxygen Species in Macrophages	0.293	0.00571	NCF2
ILK Signaling	0.286	0.00559	ACTC1
Integrin Signaling	0.267	0.00524	ACTC1
LPS/IL-1 Mediated Inhibition of RXR Function	0.258	0.00508	IL4I1
Actin Cytoskeleton Signaling	0.247	0.00488	ACTC1
Cardiac Hypertrophy Signaling	0.234	0.00465	IL6
Colorectal Cancer Metastasis Signaling	0.218	0.00439	IL6
G-Protein Coupled Receptor Signaling	0.203	0.00413	RGS16
Protein Ubiquitination Pathway	0.201	0.0041	USP18

## Sheet: cluster_10
Ingenuity Canonical Pathways	-log(p-value)	Ratio	Molecules
Death Receptor Signaling	7.5	0.133	RIPK1,CASP3,PARP10,ZC3HAV1,PARP12,NFKB1,PARP9,CASP7,FAS,PARP14,BIRC2,CASP10
Interferon Signaling	5.91	0.206	SOCS1,IFI35,IRF9,JAK2,STAT1,IRF1,IFITM1
Type I Diabetes Mellitus Signaling	5.06	0.0971	SOCS1,RIPK1,CASP3,MYD88,JAK2,STAT1,NFKB1,IL1RAP,IRF1,FAS
TWEAK Signaling	4.81	0.182	RIPK1,CASP3,NFKB1,CASP7,BIRC2,TRAF1
Role of Macrophages, Fibroblasts and Endothelial Cells in Rheumatoid Arthritis	4.69	0.0571	SOCS1,ICAM1,MMP3,MYD88,JAK2,NFKB1,PIK3R3,FZD4,RIPK1,CCL2,IL1RN,TLR3,IL1RAP,MMP1,ADAMTS4,TRAF1
Glucocorticoid Receptor Signaling	4.66	0.0598	ICAM1,SGK1,JAK2,NFKB1,TAF13,PIK3R3,GTF2B,CCL2,BAG1,DUSP1,IL1RN,PTGS2,SERPINE1,STAT1,MMP1
Retinoic acid Mediated Apoptosis Signaling	4.63	0.135	CASP3,PARP10,ZC3HAV1,PARP12,PARP9,IRF1,PARP14
Tumoricidal Function of Hepatic Natural Killer Cells	4.39	0.208	SERPINB9,ICAM1,CASP3,CASP7,FAS
Role of PKR in Interferon Induction and Antiviral Response	4.31	0.15	CASP3,EIF2AK2,TLR3,STAT1,NFKB1,IRF1
UVA-Induced MAPK Signaling	4.21	0.0988	PIK3R3,CASP3,PARP10,ZC3HAV1,PARP12,STAT1,PARP9,PARP14
TREM1 Signaling	3.95	0.106	NLRC5,ICAM1,CCL2,MYD88,JAK2,TLR3,NFKB1
TNFR1 Signaling	3.91	0.128	RIPK1,CASP3,TNFAIP3,NFKB1,CASP7,BIRC2
Atherosclerosis Signaling	3.87	0.0783	PLA2G4A,ICAM1,CCL2,MMP3,IL1RN,RARRES3,NFKB1,F3,MMP1
Toll-like Receptor Signaling	3.71	0.0972	MYD88,IL1RN,TNFAIP3,EIF2AK2,TLR3,NFKB1,TRAF1
Granulocyte Adhesion and Diapedesis	3.55	0.0645	CXCL16,CLDN23,ICAM1,CCL2,MMP3,CLDN1,IL1RN,ITGA2,IL1RAP,MMP1
Role of RIG1-like Receptors in Antiviral Innate Immunity	3.51	0.139	DHX58,RIPK1,NFKB1,TRIM25,CASP10
Role of JAK1 and JAK3 in Î³c Cytokine Signaling	3.4	0.103	IL7R,PIK3R3,SOCS1,IL15RA,JAK2,STAT1
Role of JAK1, JAK2 and TYK2 in Interferon Signaling	3.36	0.182	SOCS1,JAK2,STAT1,NFKB1
Induction of Apoptosis by HIV1	3.36	0.102	RIPK1,CASP3,NFKB1,FAS,BIRC2,TRAF1
Colorectal Cancer Metastasis Signaling	3.33	0.0526	PIK3R3,GNB4,FZD4,CASP3,MMP3,DIRAS3,JAK2,PTGS2,TLR3,STAT1,NFKB1,MMP1
NF-ÎºB Signaling	3.31	0.0602	PIK3R3,RIPK1,MYD88,IL1RN,BCL10,TNFAIP3,EIF2AK2,TLR3,NGF,NFKB1
Apoptosis Signaling	3.23	0.0814	CASP3,NFKB1,CASP7,FAS,MCL1,BIRC2,CASP10
CD40 Signaling	3.2	0.0952	PIK3R3,ICAM1,TNFAIP3,PTGS2,NFKB1,TRAF1
p38 MAPK Signaling	3.16	0.0696	PLA2G4A,H3F3A/H3F3B,DUSP1,IL1RN,MEF2C,STAT1,IL1RAP,FAS
IL-6 Signaling	3.16	0.0696	PIK3R3,SOCS1,TNFAIP6,IL1RN,JAK2,NFKB1,IL1RAP,MCL1
iNOS Signaling	3.14	0.116	MYD88,JAK2,STAT1,NFKB1,IRF1
IL-15 Production	3.14	0.16	JAK2,STAT1,NFKB1,IRF1
Tec Kinase Signaling	2.98	0.0592	TEC,PIK3R3,GNB4,DIRAS3,ITGA2,JAK2,STAT1,NFKB1,FAS
Prolactin Signaling	2.96	0.0857	PIK3R3,SOCS1,NMI,JAK2,STAT1,IRF1
TNFR2 Signaling	2.94	0.143	TNFAIP3,NFKB1,BIRC2,TRAF1
IL-17 Signaling	2.93	0.0845	PIK3R3,CCL2,MMP3,JAK2,PTGS2,NFKB1
Hepatic Fibrosis / Hepatic Stellate Cell Activation	2.88	0.0529	ICAM1,CCL2,EDN1,STAT1,SERPINE1,NFKB1,IL1RAP,AGTR1,FAS,MMP1
Acute Phase Response Signaling	2.85	0.0566	PIK3R3,SOCS1,RIPK1,MYD88,IL1RN,JAK2,SERPINE1,NFKB1,IL1RAP
Role of IL-17A in Arthritis	2.77	0.0962	PIK3R3,CCL2,PTGS2,NFKB1,MMP1
Agranulocyte Adhesion and Diapedesis	2.73	0.0545	CXCL16,CLDN23,ICAM1,CCL2,MMP3,CLDN1,IL1RN,ITGA2,MMP1
Lymphotoxin Î² Receptor Signaling	2.73	0.0943	PIK3R3,CASP3,NFKB1,BIRC2,TRAF1
Activation of IRF by Cytosolic Pattern Recognition Receptors	2.69	0.0926	DHX58,RIPK1,IRF9,STAT1,NFKB1
Oncostatin M Signaling	2.67	0.121	MMP3,JAK2,STAT1,MMP1
IL-17A Signaling in Fibroblasts	2.58	0.114	CCL2,NFKBIZ,NFKB1,MMP1
Role of Osteoblasts, Osteoclasts and Chondrocytes in Rheumatoid Arthritis	2.54	0.0476	PIK3R3,FZD4,MMP3,IL1RN,ITGA2,NFKB1,IL1RAP,MMP1,BIRC2,ADAMTS4
PI3K/AKT Signaling	2.42	0.0588	PIK3R3,PPP2CB,ITGA2,JAK2,PTGS2,NFKB1,MCL1
Dendritic Cell Maturation	2.37	0.0523	PIK3R3,ICAM1,MYD88,IL1RN,JAK2,TLR3,STAT1,NFKB1
Role of MAPK Signaling in the Pathogenesis of Influenza	2.34	0.0769	PLA2G4A,CASP3,CCL2,RARRES3,PTGS2
Endothelin-1 Signaling	2.29	0.0506	PIK3R3,PLA2G4A,CASP3,EDN1,RARRES3,PTGS2,CASP7,CASP10
HIF1Î± Signaling	2.26	0.0625	PIK3R3,MMP3,EDN1,HIF1A,SLC2A3,MMP1
Salvage Pathways of Pyrimidine Deoxyribonucleotides	2.26	0.286	TYMP,APOBEC3G
PEDF Signaling	2.23	0.0725	PIK3R3,NGF,NFKB1,CASP7,FAS
Small Cell Lung Cancer Signaling	2.2	0.0714	PIK3R3,PTGS2,NFKB1,BIRC2,TRAF1
JAK/Stat Signaling	2.2	0.0714	PIK3R3,SOCS1,JAK2,STAT1,NFKB1
Sphingosine-1-phosphate Signaling	2.16	0.0594	PIK3R3,CASP3,DIRAS3,SPHK1,CASP7,CASP10
NF-ÎºB Activation by Viruses	2.15	0.0694	PIK3R3,RIPK1,ITGA2,EIF2AK2,NFKB1
PDGF Signaling	2.1	0.0676	PIK3R3,SPHK1,JAK2,EIF2AK2,STAT1
Role of JAK family kinases in IL-6-type Cytokine Signaling	2.09	0.12	SOCS1,JAK2,STAT1
Renin-Angiotensin Signaling	2.08	0.0571	PIK3R3,CCL2,JAK2,STAT1,NFKB1,AGTR1
Role of Tissue Factor in Cancer	2.08	0.0571	PIK3R3,CASP3,PLAUR,JAK2,F3,MMP1
ILK Signaling	1.98	0.0447	PIK3R3,PPP2CB,CASP3,DIRAS3,HIF1A,PTGS2,RICTOR,NFKB1
ERK/MAPK Signaling	1.94	0.044	PIK3R3,PPP2CB,PLA2G4A,H3F3A/H3F3B,DUSP1,ITGA2,STAT1,ELF1
Role of Pattern Recognition Receptors in Recognition of Bacteria and Viruses	1.93	0.0531	PIK3R3,MYD88,EIF2AK2,TLR3,NFKB1,RIPK2
Leukocyte Extravasation Signaling	1.92	0.0437	TEC,PIK3R3,CLDN23,ICAM1,MMP3,CLDN1,ITGA2,MMP1
Cytotoxic T Lymphocyte-mediated Apoptosis of Target Cells	1.91	0.103	CASP3,CASP7,FAS
LXR/RXR Activation	1.91	0.0526	CCL2,IL1RN,PTGS2,TLR3,NFKB1,IL1RAP
Role of JAK2 in Hormone-like Cytokine Signaling	1.87	0.1	SOCS1,JAK2,STAT1
HMGB1 Signaling	1.86	0.0513	PIK3R3,ICAM1,CCL2,DIRAS3,SERPINE1,NFKB1
Molecular Mechanisms of Cancer	1.81	0.0341	PIK3R3,FZD4,CASP3,DIRAS3,ITGA2,HIF1A,JAK2,NFKB1,CASP7,FAS,BIRC2,CASP10
Coagulation System	1.8	0.0938	PLAUR,SERPINE1,F3
MIF-mediated Glucocorticoid Regulation	1.8	0.0938	PLA2G4A,PTGS2,NFKB1
Antioxidant Action of Vitamin C	1.78	0.0562	PLA2G4A,RARRES3,JAK2,NFKB1,SLC2A3
IL-9 Signaling	1.76	0.0909	PIK3R3,STAT1,NFKB1
IL-15 Signaling	1.65	0.0625	PIK3R3,IL15RA,JAK2,NFKB1
p53 Signaling	1.65	0.0521	PIK3R3,PLAGL1,HIF1A,PML,FAS
Erythropoietin Signaling	1.63	0.0615	PIK3R3,SOCS1,JAK2,NFKB1
Growth Hormone Signaling	1.61	0.0606	PIK3R3,SOCS1,JAK2,STAT1
Production of Nitric Oxide and Reactive Oxygen Species in Macrophages	1.56	0.04	PIK3R3,PPP2CB,DIRAS3,JAK2,STAT1,NFKB1,IRF1
MIF Regulation of Innate Immunity	1.54	0.075	PLA2G4A,PTGS2,NFKB1
Huntington's Disease Signaling	1.54	0.037	PIK3R3,GNB4,CASP3,SGK1,PSME2,NGF,CASP7,CASP10
Pancreatic Adenocarcinoma Signaling	1.5	0.0476	PIK3R3,JAK2,PTGS2,STAT1,NFKB1
Glycerol-3-phosphate Shuttle	1.48	0.5	GPD2
MSP-RON Signaling Pathway	1.41	0.0667	PIK3R3,CCL2,JAK2
Ceramide Signaling	1.38	0.0513	PIK3R3,PPP2CB,SPHK1,NFKB1
Altered T Cell and B Cell Signaling in Rheumatoid Arthritis	1.36	0.0506	IL1RN,TLR3,NFKB1,FAS
Crosstalk between Dendritic Cells and Natural Killer Cells	1.35	0.05	IL15RA,TLR3,NFKB1,FAS
CNTF Signaling	1.34	0.0625	PIK3R3,JAK2,STAT1
Endoplasmic Reticulum Stress Pathway	1.32	0.0952	CASP3,CASP7
IL-12 Signaling and Production in Macrophages	1.26	0.0407	PIK3R3,MYD88,STAT1,NFKB1,IRF1
Thrombopoietin Signaling	1.23	0.0566	PIK3R3,JAK2,STAT1
PPAR Signaling	1.19	0.0444	IL1RN,PTGS2,NFKB1,IL1RAP
Glioma Invasiveness Signaling	1.19	0.0545	PIK3R3,DIRAS3,PLAUR
Spermine and Spermidine Degradation I	1.19	0.25	SMOX
Myo-inositol Biosynthesis	1.19	0.25	IMPA1
Melatonin Degradation II	1.19	0.25	SMOX
RAR Activation	1.18	0.0353	PIK3R3,DUSP1,JAK2,PML,NFKB1,MMP1
IL-1 Signaling	1.18	0.044	GNB4,MYD88,NFKB1,IL1RAP
T Cell Receptor Signaling	1.18	0.044	TEC,PIK3R3,BCL10,NFKB1
Myc Mediated Apoptosis Signaling	1.16	0.0526	PIK3R3,CASP3,FAS
Amyotrophic Lateral Sclerosis Signaling	1.14	0.0426	PIK3R3,CASP3,CASP7,BIRC2
Eicosanoid Signaling	1.12	0.0508	PLA2G4A,RARRES3,PTGS2
Glycerol Degradation I	1.09	0.2	GPD2
UDP-N-acetyl-D-glucosamine Biosynthesis II	1.09	0.2	UAP1
IL-8 Signaling	1.09	0.0333	PIK3R3,GNB4,ICAM1,DIRAS3,PTGS2,NFKB1
GM-CSF Signaling	1.09	0.0492	PIK3R3,JAK2,STAT1
G Protein Signaling Mediated by Tubby	1.08	0.069	GNB4,JAK2
IL-17A Signaling in Airway Cells	1.07	0.0484	PIK3R3,JAK2,NFKB1
Cholecystokinin/Gastrin-mediated Signaling	1.06	0.04	IL1RN,DIRAS3,MEF2C,PTGS2
ERK5 Signaling	1.05	0.0476	SGK1,MEF2C,NGF
Hypoxia Signaling in the Cardiovascular System	1.05	0.0476	EDN1,HIF1A,UBE2L6
GÎ±q Signaling	1.05	0.0352	PIK3R3,GNB4,DIRAS3,NFKB1,AGTR1
HGF Signaling	1.04	0.0392	PIK3R3,ITGA2,PTGS2,ELF1
Rac Signaling	1.04	0.0392	PIK3R3,ITGA2,SH3RF1,NFKB1
4-1BB Signaling in T Lymphocytes	1.03	0.0645	NFKB1,TRAF1
Chondroitin and Dermatan Biosynthesis	1.02	0.167	CHSY3
IL-10 Signaling	1.01	0.0455	IL1RN,NFKB1,IL1RAP
Type II Diabetes Mellitus Signaling	0.959	0.0367	PIK3R3,SOCS1,ACSL4,NFKB1
IL-3 Signaling	0.951	0.0429	PIK3R3,JAK2,STAT1
IL-4 Signaling	0.951	0.0429	PIK3R3,SOCS1,JAK2
LPS/IL-1 Mediated Inhibition of RXR Function	0.947	0.0305	HS3ST3B1,MYD88,IL1RN,SMOX,ACSL4,IL1RAP
Cell Cycle Regulation by BTG Family Proteins	0.937	0.0571	PPP2CB,CCRN4L
Role of Hypercytokinemia/hyperchemokinemia in the Pathogenesis of Influenza	0.937	0.0571	CCL2,IL1RN
GÎ±12/13 Signaling	0.928	0.0357	TEC,PIK3R3,MEF2C,NFKB1
Chondroitin Sulfate Biosynthesis (Late Stages)	0.917	0.0556	HS3ST3B1,CHSY3
VEGF Family Ligand-Receptor Interactions	0.91	0.0411	PIK3R3,PLA2G4A,NRP2
Airway Pathology in Chronic Obstructive Pulmonary Disease	0.899	0.125	MMP1
Inhibition of Matrix Metalloproteases	0.897	0.0541	MMP3,MMP1
PTEN Signaling	0.887	0.0345	PIK3R3,CASP3,ITGA2,NFKB1
Acute Myeloid Leukemia Signaling	0.885	0.04	PIK3R3,PML,NFKB1
Role of NFAT in Regulation of the Immune Response	0.885	0.0312	PIK3R3,RCAN1,GNB4,MEF2C,NFKB1
Docosahexaenoic Acid (DHA) Signaling	0.878	0.0526	PIK3R3,CASP3
April Mediated Signaling	0.878	0.0526	NFKB1,TRAF1
PPARÎ±/RXRÎ± Activation	0.876	0.0311	GPD2,MEF2C,JAK2,NFKB1,IL1RAP
Prostanoid Biosynthesis	0.852	0.111	PTGS2
Glycogen Degradation II	0.852	0.111	TYMP
UDP-N-acetyl-D-galactosamine Biosynthesis II	0.852	0.111	UAP1
B Cell Activating Factor Signaling	0.842	0.05	NFKB1,TRAF1
Role of IL-17F in Allergic Inflammatory Airway Diseases	0.842	0.05	CCL2,NFKB1
Adipogenesis pathway	0.831	0.0328	FZD4,HIF1A,CCRN4L,RPS6KC1
B Cell Receptor Signaling	0.829	0.0299	PIK3R3,BCL10,MEF2C,BCL6,NFKB1
CTLA4 Signaling in Cytotoxic T Lymphocytes	0.814	0.037	PIK3R3,PPP2CB,JAK2
Graft-versus-Host Disease Signaling	0.793	0.0465	IL1RN,FAS
Chondroitin Sulfate Biosynthesis	0.793	0.0465	HS3ST3B1,CHSY3
Human Embryonic Stem Cell Pluripotency	0.787	0.0315	PIK3R3,FZD4,SPHK1,NGF
Ovarian Cancer Signaling	0.778	0.0312	PIK3R3,FZD4,EDN1,PTGS2
Glycogen Degradation III	0.772	0.0909	TYMP
Neuregulin Signaling	0.77	0.0353	NRG1,PIK3R3,ITGA2
RANK Signaling in Osteoclasts	0.77	0.0353	PIK3R3,NFKB1,BIRC2
Role of Oct4 in Mammalian Embryonic Stem Cell Pluripotency	0.762	0.0444	TDRD7,SH3GLB1
Dermatan Sulfate Biosynthesis	0.762	0.0444	HS3ST3B1,CHSY3
Regulation of the Epithelial-Mesenchymal Transition Pathway	0.757	0.0282	PIK3R3,FZD4,HIF1A,JAK2,NFKB1
PAK Signaling	0.75	0.0345	PIK3R3,CASP3,ITGA2
Salvage Pathways of Pyrimidine Ribonucleotides	0.75	0.0345	SGK1,EIF2AK2,APOBEC3G
Phospholipase C Signaling	0.75	0.0265	PLA2G4A,GNB4,DIRAS3,ITGA2,MEF2C,NFKB1
Role of Cytokines in Mediating Communication between Immune Cells	0.747	0.0435	IL1RN,IL24
mTOR Signaling	0.73	0.0276	PIK3R3,PPP2CB,DIRAS3,HIF1A,RICTOR
Assembly of RNA Polymerase II Complex	0.719	0.0417	GTF2B,TAF13
Glutamate Receptor Signaling	0.719	0.0417	SLC1A3,HOMER1
Fatty Acid Activation	0.706	0.0769	ACSL4
Phenylalanine Degradation IV (Mammalian, via Side Chain)	0.706	0.0769	SMOX
Guanosine Nucleotides Degradation III	0.706	0.0769	NT5E
Fatty Acid Î±-oxidation	0.706	0.0769	PTGS2
Phospholipases	0.705	0.0408	PLA2G4A,RARRES3
Mouse Embryonic Stem Cell Pluripotency	0.701	0.0326	PIK3R3,FZD4,JAK2
Wnt/Ca+ pathway	0.692	0.04	FZD4,NFKB1
Aldosterone Signaling in Epithelial Cells	0.684	0.0286	PIK3R3,DUSP1,SGK1,DNAJA1
Telomerase Signaling	0.683	0.0319	PIK3R3,PPP2CB,ELF1
CD27 Signaling in Lymphocytes	0.679	0.0392	CASP3,NFKB1
UVB-Induced MAPK Signaling	0.679	0.0392	PIK3R3,H3F3A/H3F3B
Urate Biosynthesis/Inosine 5'-phosphate Degradation	0.677	0.0714	NT5E
Vitamin-C Transport	0.677	0.0714	SLC2A3
Parkinson's Signaling	0.677	0.0714	CASP3
3-phosphoinositide Biosynthesis	0.677	0.0284	PIK3R3,DUSP1,PI4K2B,PPM1K
IGF-1 Signaling	0.674	0.0316	PIK3R3,SOCS1,JAK2
IL-2 Signaling	0.666	0.0385	PIK3R3,SOCS1
CDK5 Signaling	0.656	0.0309	PPP2CB,ITGA2,NGF
Extrinsic Prothrombin Activation Pathway	0.651	0.0667	F3
Adenosine Nucleotides Degradation II	0.651	0.0667	NT5E
Role of PI3K/AKT Signaling in the Pathogenesis of Influenza	0.642	0.037	PIK3R3,NFKB1
EGF Signaling	0.642	0.037	PIK3R3,STAT1
ErbB2-ErbB3 Signaling	0.631	0.0364	NRG1,PIK3R3
Granzyme B Signaling	0.626	0.0625	CASP3
Tryptophan Degradation X (Mammalian, via Tryptamine)	0.626	0.0625	SMOX
Putrescine Degradation III	0.626	0.0625	SMOX
Axonal Guidance Signaling	0.62	0.0222	PIK3R3,GNB4,ADAMTS6,FZD4,NRP2,ITGA2,ADAM19,NGF,ADAMTS4
Actin Nucleation by ARP-WASP Complex	0.619	0.0357	DIRAS3,ITGA2
ErbB4 Signaling	0.619	0.0357	NRG1,PIK3R3
Î³-linolenate Biosynthesis II (Animals)	0.604	0.0588	ACSL4
Mitochondrial L-carnitine Shuttle Pathway	0.604	0.0588	ACSL4
D-myo-inositol (1,4,5)-trisphosphate Degradation	0.604	0.0588	IMPA1
NGF Signaling	0.599	0.0288	PIK3R3,NGF,NFKB1
fMLP Signaling in Neutrophils	0.591	0.0286	PIK3R3,GNB4,NFKB1
Germ Cell-Sertoli Cell Junction Signaling	0.59	0.026	PIK3R3,DIRAS3,ITGA2,RAB8B
Antiproliferative Role of Somatostatin Receptor 2	0.587	0.0339	PIK3R3,GNB4
Hepatic Cholestasis	0.584	0.0258	MYD88,IL1RN,NFKB1,IL1RAP
Role of NANOG in Mammalian Embryonic Stem Cell Pluripotency	0.584	0.0283	PIK3R3,FZD4,JAK2
Differential Regulation of Cytokine Production in Macrophages and T Helper Cells by IL-17A and IL-17F	0.582	0.0556	CCL2
Purine Nucleotides Degradation II (Aerobic)	0.582	0.0556	NT5E
Role of BRCA1 in DNA Damage Response	0.577	0.0333	BRIP1,STAT1
CD28 Signaling in T Helper Cells	0.569	0.0278	PIK3R3,BCL10,NFKB1
Estrogen-Dependent Breast Cancer Signaling	0.567	0.0328	PIK3R3,NFKB1
PCP pathway	0.567	0.0328	FZD4,JUNB
Cardiomyocyte Differentiation via BMP Receptors	0.562	0.0526	MEF2C
Dopamine Degradation	0.562	0.0526	SMOX
NAD Salvage Pathway II	0.562	0.0526	NT5E
PKCÎ¸ Signaling in T Lymphocytes	0.562	0.0275	PIK3R3,BCL10,NFKB1
Pyridoxal 5'-phosphate Salvage Pathway	0.557	0.0323	SGK1,EIF2AK2
CCR3 Signaling in Eosinophils	0.555	0.0273	PIK3R3,PLA2G4A,GNB4
Androgen Signaling	0.555	0.0273	GNB4,GTF2B,NFKB1
Tight Junction Signaling	0.543	0.0247	PPP2CB,CLDN23,CLDN1,NFKB1
Angiopoietin Signaling	0.538	0.0312	PIK3R3,NFKB1
p70S6K Signaling	0.534	0.0265	PIK3R3,PPP2CB,AGTR1
P2Y Purigenic Receptor Signaling Pathway	0.534	0.0265	PIK3R3,GNB4,NFKB1
CCR5 Signaling in Macrophages	0.529	0.0308	GNB4,FAS
T Helper Cell Differentiation	0.529	0.0308	STAT1,BCL6
Neurotrophin/TRK Signaling	0.529	0.0308	PIK3R3,NGF
Macropinocytosis Signaling	0.52	0.0303	PIK3R3,NGF
Agrin Interactions at Neuromuscular Junction	0.511	0.0299	NRG1,ITGA2
Renal Cell Carcinoma Signaling	0.511	0.0299	PIK3R3,HIF1A
Sertoli Cell-Sertoli Cell Junction Signaling	0.51	0.0238	CLDN23,CLDN1,ITGA2,RAB8B
Polyamine Regulation in Colon Cancer	0.509	0.0455	PSME2
Pyrimidine Ribonucleotides Interconversion	0.509	0.0455	ENTPD7
Role of NFAT in Cardiac Hypertrophy	0.505	0.0237	PIK3R3,RCAN1,GNB4,MEF2C
Leptin Signaling in Obesity	0.502	0.0294	PIK3R3,JAK2
Differential Regulation of Cytokine Production in Intestinal Epithelial Cells by IL-17A and IL-17F	0.493	0.0435	CCL2
D-myo-inositol (1,4,5)-Trisphosphate Biosynthesis	0.493	0.0435	PI4K2B
Superpathway of D-myo-inositol (1,4,5)-trisphosphate Metabolism	0.493	0.0435	IMPA1
Signaling by Rho Family GTPases	0.49	0.0222	PIK3R3,GNB4,DIRAS3,ITGA2,NFKB1
FLT3 Signaling in Hematopoietic Progenitor Cells	0.486	0.0286	PIK3R3,STAT1
IL-22 Signaling	0.478	0.0417	STAT1
Pyrimidine Ribonucleotides De Novo Biosynthesis	0.478	0.0417	ENTPD7
STAT3 Pathway	0.478	0.0282	SOCS1,JAK2
Superpathway of Inositol Phosphate Compounds	0.474	0.0229	PIK3R3,DUSP1,PI4K2B,PPM1K
LPS-stimulated MAPK Signaling	0.47	0.0278	PIK3R3,NFKB1
Synaptic Long Term Depression	0.465	0.0242	PPP2CB,PLA2G4A,RARRES3
Estrogen Receptor Signaling	0.465	0.0242	GTF2B,H3F3A/H3F3B,TAF13
Insulin Receptor Signaling	0.465	0.0242	PIK3R3,SGK1,JAK2
IL-17A Signaling in Gastric Cells	0.464	0.04	NFKB1
HER-2 Signaling in Breast Cancer	0.454	0.027	NRG1,PIK3R3
Cardiac Î²-adrenergic Signaling	0.453	0.0238	PPP2CB,GNB4,AKAP7
B Cell Development	0.45	0.0385	IL7R
Complement System	0.45	0.0385	CFH
Relaxin Signaling	0.448	0.0236	PIK3R3,GNB4,NFKB1
Thrombin Signaling	0.441	0.022	PIK3R3,GNB4,DIRAS3,NFKB1
Regulation of IL-2 Expression in Activated and Anergic T Lymphocytes	0.44	0.0263	BCL10,NFKB1
Role of p14/p19ARF in Tumor Suppression	0.437	0.037	PIK3R3
VDR/RXR Activation	0.432	0.026	GTF2B,KLF4
Communication between Innate and Adaptive Immune Cells	0.432	0.026	IL1RN,TLR3
Dopamine Receptor Signaling	0.432	0.026	PPP2CB,SMOX
Reelin Signaling in Neurons	0.426	0.0256	PIK3R3,ITGA2
Noradrenaline and Adrenaline Degradation	0.424	0.0357	SMOX
Fatty Acid Î²-oxidation I	0.424	0.0357	ACSL4
Protein Kinase A Signaling	0.424	0.0198	GNB4,DUSP5,H3F3A/H3F3B,DUSP1,PTGS2,NFKB1,AKAP7
Prostate Cancer Signaling	0.419	0.0253	PIK3R3,NFKB1
Protein Ubiquitination Pathway	0.413	0.0205	BAG1,PSME2,DNAJA1,UBE2L6,BIRC2
Xenobiotic Metabolism Signaling	0.413	0.0205	PIK3R3,HS3ST3B1,PPP2CB,SMOX,NFKB1
Aryl Hydrocarbon Receptor Signaling	0.411	0.0224	NCOA7,NFKB1,FAS
Integrin Signaling	0.402	0.0209	PIK3R3,DIRAS3,ITGA2,NEDD9
TR/RXR Activation	0.399	0.0244	PIK3R3,HIF1A
Melanocyte Development and Pigmentation Signaling	0.399	0.0244	PIK3R3,PAX3
Bladder Cancer Signaling	0.393	0.0241	MMP3,MMP1
ErbB Signaling	0.393	0.0241	NRG1,PIK3R3
FAK Signaling	0.386	0.0238	PIK3R3,ITGA2
Glioblastoma Multiforme Signaling	0.386	0.0216	PIK3R3,FZD4,DIRAS3
Regulation of eIF4 and p70S6K Signaling	0.382	0.0214	PIK3R3,PPP2CB,ITGA2
Virus Entry via Endocytic Pathways	0.38	0.0235	PIK3R3,ITGA2
Inhibition of Angiogenesis by TSP1	0.38	0.0312	CASP3
Antigen Presentation Pathway	0.38	0.0312	NLRC5
TGF-Î² Signaling	0.374	0.0233	RUNX3,SERPINE1
Dermatan Sulfate Biosynthesis (Late Stages)	0.37	0.0303	HS3ST3B1
Regulation of Actin-based Motility by Rho	0.368	0.023	DIRAS3,ITGA2
Factors Promoting Cardiogenesis in Vertebrates	0.368	0.023	FZD4,MEF2C
VEGF Signaling	0.368	0.023	PIK3R3,HIF1A
Stearate Biosynthesis I (Animals)	0.36	0.0294	ACSL4
CXCR4 Signaling	0.346	0.0203	PIK3R3,GNB4,DIRAS3
Chronic Myeloid Leukemia Signaling	0.346	0.022	PIK3R3,NFKB1
SAPK/JNK Signaling	0.346	0.022	PIK3R3,RIPK1
tRNA Charging	0.333	0.027	WARS
Notch Signaling	0.333	0.027	DLL1
Thyroid Cancer Signaling	0.317	0.0256	NGF
Paxillin Signaling	0.315	0.0206	PIK3R3,ITGA2
Cardiac Hypertrophy Signaling	0.314	0.0186	PIK3R3,GNB4,DIRAS3,MEF2C
FcÎ³RIIB Signaling in B Lymphocytes	0.309	0.025	PIK3R3
Mechanisms of Viral Exit from Host Cells	0.309	0.025	SH3GLB1
Heparan Sulfate Biosynthesis (Late Stages)	0.309	0.025	HS3ST3B1
iCOS-iCOSL Signaling in T Helper Cells	0.306	0.0202	PIK3R3,NFKB1
CREB Signaling in Neurons	0.303	0.0189	PIK3R3,GNB4,GTF2B
Melanoma Signaling	0.302	0.0244	PIK3R3
Autoimmune Thyroid Disease Signaling	0.302	0.0244	FAS
Serotonin Receptor Signaling	0.302	0.0244	SMOX
Allograft Rejection Signaling	0.294	0.0238	FAS
Primary Immunodeficiency Signaling	0.287	0.0233	IL7R
Fc Epsilon RI Signaling	0.283	0.0192	PIK3R3,PLA2G4A
Corticotropin Releasing Hormone Signaling	0.279	0.019	MEF2C,PTGS2
RhoGDI Signaling	0.275	0.018	GNB4,DIRAS3,ITGA2
Sperm Motility	0.271	0.0187	PLA2G4A,RARRES3
Ephrin Receptor Signaling	0.269	0.0178	GNB4,ITGA2,JAK2
Ephrin A Signaling	0.268	0.0217	PIK3R3
Heparan Sulfate Biosynthesis	0.268	0.0217	HS3ST3B1
Serotonin Degradation	0.268	0.0217	SMOX
NRF2-mediated Oxidative Stress Response	0.259	0.0174	PIK3R3,JUNB,DNAJA1
OX40 Signaling Pathway	0.256	0.0208	NFKB1
Clathrin-mediated Endocytosis Signaling	0.25	0.0171	PIK3R3,SH3GLB1,HIP1R
Endometrial Cancer Signaling	0.244	0.02	PIK3R3
Nur77 Signaling in T Lymphocytes	0.244	0.02	CASP3
Superpathway of Melatonin Degradation	0.244	0.02	SMOX
PI3K Signaling in B Lymphocytes	0.24	0.0174	BCL10,NFKB1
D-myo-inositol (1,4,5,6)-Tetrakisphosphate Biosynthesis	0.24	0.0174	DUSP1,PPM1K
D-myo-inositol (3,4,5,6)-tetrakisphosphate Biosynthesis	0.24	0.0174	DUSP1,PPM1K
GÎ±i Signaling	0.24	0.0174	GNB4,AGTR1
Semaphorin Signaling in Neurons	0.239	0.0196	DIRAS3
Role of CHK Proteins in Cell Cycle Checkpoint Control	0.218	0.0182	PPP2CB
Regulation of Cellular Mechanics by Calpain Protease	0.218	0.0182	ITGA2
